# Supplementary material for: Identification of Quantitative Proteomic Differences between Mycobacterium tuberculosis Lineages with Altered Virulence
Source: Front Microbiol. 2016 May 31;7:813. doi: 10.3389/fmicb.2016.00813 (PMC4885829; doi:10.3389/fmicb.2016.00813)
Supplement: Supplementary file 5 [file Table5.XLSX]

## Sheet: M.tb Core proteome
Supplementary Table 5 All protein ID's obtained from shotgun MS in each strain, and those shared by the MTBC
LAM	H37Rv	CAS	Beijing	Bovis	BCG	Avium	MTBC
Rv0001	Rv0001	Rv0001	Rv0001	Rv0001	Rv0001	Rv0001	Rv0001
Rv0002	Rv0002	Rv0003	Rv0002	Rv0002	Rv0002	Rv0002	Rv0004
Rv0004	Rv0003	Rv0004	Rv0003	Rv0003	Rv0003	Rv0003	Rv0007
Rv0007	Rv0004	Rv0005	Rv0004	Rv0004	Rv0004	Rv0004	Rv0009
Rv0008c	Rv0005	Rv0006	Rv0005	Rv0005	Rv0005	Rv0005	Rv0014c
Rv0009	Rv0006	Rv0007	Rv0006	Rv0006	Rv0006	Rv0006	Rv0016c
Rv0011c	Rv0007	Rv0009	Rv0007	Rv0007	Rv0007	Rv0007	Rv0019c
Rv0013	Rv0008c	Rv0011c	Rv0008c	Rv0008c	Rv0008c	Rv0008c	Rv0020c
Rv0014c	Rv0009	Rv0012	Rv0009	Rv0009	Rv0010c	Rv0009	Rv0022c
Rv0015c	Rv0010c	Rv0014c	Rv0010c	Rv0010c	Rv0012	Rv0010c	Rv0023
Rv0016c	Rv0011c	Rv0016c	Rv0012	Rv0011c	Rv0014c	Rv0012	Rv0024
Rv0017c	Rv0012	Rv0017c	Rv0014c	Rv0012	Rv0015c	Rv0014c	Rv0025
Rv0019c	Rv0014c	Rv0018c	Rv0015c	Rv0014c	Rv0016c	Rv0015c	Rv0026
Rv0020c	Rv0015c	Rv0019c	Rv0016c	Rv0015c	Rv0018c	Rv0016c	Rv0029
Rv0021c	Rv0016c	Rv0020c	Rv0018c	Rv0016c	Rv0019c	Rv0017c	Rv0032
Rv0022c	Rv0018c	Rv0022c	Rv0019c	Rv0017c	Rv0020c	Rv0018c	Rv0035
Rv0023	Rv0019c	Rv0023	Rv0020c	Rv0018c	Rv0022c	Rv0019c	Rv0036c
Rv0024	Rv0020c	Rv0024	Rv0021c	Rv0019c	Rv0023	Rv0020c	Rv0038
Rv0025	Rv0021c	Rv0025	Rv0022c	Rv0020c	Rv0024	Rv0021c	Rv0041
Rv0026	Rv0022c	Rv0026	Rv0023	Rv0021c	Rv0025	Rv0022c	Rv0043c
Rv0027	Rv0023	Rv0027	Rv0024	Rv0022c	Rv0026	Rv0023	Rv0044c
Rv0029	Rv0024	Rv0029	Rv0025	Rv0023	Rv0027	Rv0024	Rv0045c
Rv0032	Rv0025	Rv0030	Rv0026	Rv0024	Rv0029	Rv0025	Rv0046c
Rv0034	Rv0026	Rv0032	Rv0027	Rv0025	Rv0030	Rv0026	Rv0047c
Rv0035	Rv0029	Rv0035	Rv0029	Rv0026	Rv0031	Rv0027	Rv0048c
Rv0036c	Rv0030	Rv0036c	Rv0030	Rv0027	Rv0032	Rv0029	Rv0051
Rv0037c	Rv0031	Rv0038	Rv0032	Rv0029	Rv0033	Rv0030	Rv0054
Rv0038	Rv0032	Rv0041	Rv0033	Rv0030	Rv0034	Rv0037c	Rv0056
Rv0040c	Rv0033	Rv0043c	Rv0034	Rv0031	Rv0035	Rv0038	Rv0057
Rv0041	Rv0034	Rv0044c	Rv0035	Rv0032	Rv0036c	Rv0040c	Rv0058
Rv0042c	Rv0035	Rv0045c	Rv0036c	Rv0033	Rv0037c	Rv0041	Rv0060
Rv0043c	Rv0036c	Rv0046c	Rv0037c	Rv0034	Rv0038	Rv0042c	Rv0062
Rv0044c	Rv0037c	Rv0047c	Rv0038	Rv0035	Rv0040c	Rv0043c	Rv0066c
Rv0045c	Rv0038	Rv0048c	Rv0040c	Rv0036c	Rv0041	Rv0044c	Rv0067c
Rv0046c	Rv0040c	Rv0050	Rv0041	Rv0037c	Rv0042c	Rv0045c	Rv0068
Rv0047c	Rv0041	Rv0051	Rv0042c	Rv0038	Rv0043c	Rv0046c	Rv0069c
Rv0048c	Rv0042c	Rv0052	Rv0043c	Rv0040c	Rv0044c	Rv0047c	Rv0070c
Rv0049	Rv0043c	Rv0054	Rv0044c	Rv0041	Rv0046c	Rv0048c	Rv0072
Rv0051	Rv0044c	Rv0055	Rv0045c	Rv0042c	Rv0047c	Rv0049	Rv0073
Rv0054	Rv0045c	Rv0056	Rv0046c	Rv0043c	Rv0048c	Rv0050	Rv0074
Rv0055	Rv0046c	Rv0057	Rv0047c	Rv0044c	Rv0049	Rv0051	Rv0075
Rv0056	Rv0047c	Rv0058	Rv0048c	Rv0045c	Rv0050	Rv0052	Rv0077c
Rv0057	Rv0048c	Rv0059	Rv0049	Rv0046c	Rv0051	Rv0053	Rv0078
Rv0058	Rv0049	Rv0060	Rv0050	Rv0047c	Rv0052	Rv0055	Rv0078.1
Rv0060	Rv0050	Rv0062	Rv0051	Rv0048c	Rv0053	Rv0056	Rv0079
Rv0062	Rv0051	Rv0064	Rv0052	Rv0049	Rv0054	Rv0058	Rv0085
Rv0063	Rv0052	Rv0066c	Rv0053	Rv0050	Rv0055	Rv0063	Rv0087
Rv0065	Rv0053	Rv0067c	Rv0054	Rv0051	Rv0056	Rv0066c	Rv0088
Rv0066c	Rv0054	Rv0068	Rv0056	Rv0052	Rv0057	Rv0067c	Rv0090
Rv0067c	Rv0055	Rv0069c	Rv0057	Rv0053	Rv0058	Rv0073	Rv0091
Rv0068	Rv0056	Rv0070c	Rv0058	Rv0054	Rv0060	Rv0077c	Rv0097
Rv0069c	Rv0057	Rv0071	Rv0060	Rv0055	Rv0061	Rv0078	Rv0099
Rv0070c	Rv0058	Rv0072	Rv0062	Rv0056	Rv0062	Rv0081	Rv0103c
Rv0072	Rv0059	Rv0073	Rv0063	Rv0057	Rv0063	Rv0082	Rv0104
Rv0073	Rv0060	Rv0074	Rv0064	Rv0058	Rv0064	Rv0083	Rv0105c
Rv0074	Rv0061	Rv0075	Rv0065	Rv0059	Rv0065	Rv0084	Rv0106
Rv0075	Rv0062	Rv0077c	Rv0066c	Rv0060	Rv0066c	Rv0087	Rv0107c
Rv0077c	Rv0063	Rv0078	Rv0067c	Rv0062	Rv0067c	Rv0088	Rv0110
Rv0078	Rv0064	Rv0078.1	Rv0068	Rv0063	Rv0068	Rv0090	Rv0111
Rv0078.1	Rv0065	Rv0079	Rv0069c	Rv0064	Rv0069c	Rv0102	Rv0112
Rv0079	Rv0066c	Rv0084	Rv0070c	Rv0065	Rv0070c	Rv0106	Rv0115
Rv0080	Rv0067c	Rv0085	Rv0071	Rv0066c	Rv0071	Rv0107c	Rv0116c
Rv0081	Rv0068	Rv0086	Rv0072	Rv0067c	Rv0072	Rv0111	Rv0117
Rv0082	Rv0069c	Rv0087	Rv0073	Rv0068	Rv0073	Rv0113	Rv0118c
Rv0083	Rv0070c	Rv0088	Rv0074	Rv0069c	Rv0074	Rv0114	Rv0126
Rv0084	Rv0071	Rv0090	Rv0075	Rv0070c	Rv0075	Rv0115	Rv0127
Rv0085	Rv0072	Rv0091	Rv0076c	Rv0071	Rv0077c	Rv0116c	Rv0129c
Rv0087	Rv0073	Rv0092	Rv0077c	Rv0072	Rv0078.1	Rv0117	Rv0130
Rv0088	Rv0074	Rv0093c	Rv0078	Rv0073	Rv0079	Rv0119	Rv0131c
Rv0089	Rv0075	Rv0094c	Rv0078.1	Rv0074	Rv0080	Rv0120c	Rv0132c
Rv0090	Rv0076c	Rv0097	Rv0079	Rv0075	Rv0081	Rv0121c	Rv0133
Rv0091	Rv0077c	Rv0098	Rv0080	Rv0077c	Rv0083	Rv0125	Rv0135c
Rv0093c	Rv0078	Rv0099	Rv0081	Rv0078	Rv0087	Rv0126	Rv0136
Rv0097	Rv0078.1	Rv0100	Rv0083	Rv0078.1	Rv0088	Rv0127	Rv0139
Rv0098	Rv0079	Rv0101	Rv0085	Rv0079	Rv0089	Rv0129c	Rv0142
Rv0099	Rv0080	Rv0103c	Rv0087	Rv0081	Rv0090	Rv0130	Rv0144
Rv0102	Rv0081	Rv0104	Rv0088	Rv0082	Rv0091	Rv0131c	Rv0146
Rv0103c	Rv0082	Rv0105c	Rv0089	Rv0083	Rv0092	Rv0132c	Rv0147
Rv0104	Rv0083	Rv0106	Rv0090	Rv0084	Rv0093c	Rv0133	Rv0153c
Rv0105c	Rv0084	Rv0107c	Rv0091	Rv0085	Rv0094c	Rv0134	Rv0154c
Rv0106	Rv0085	Rv0110	Rv0092	Rv0086	Rv0095c	Rv0135c	Rv0155
Rv0107c	Rv0087	Rv0111	Rv0093c	Rv0087	Rv0097	Rv0136	Rv0157
Rv0110	Rv0088	Rv0112	Rv0094c	Rv0088	Rv0098	Rv0139	Rv0158
Rv0111	Rv0089	Rv0114	Rv0097	Rv0089	Rv0099	Rv0140	Rv0161
Rv0112	Rv0090	Rv0115	Rv0098	Rv0090	Rv0100	Rv0141c	Rv0162c
Rv0114	Rv0091	Rv0116c	Rv0099	Rv0091	Rv0101	Rv0142	Rv0163
Rv0115	Rv0092	Rv0117	Rv0100	Rv0092	Rv0102	Rv0143c	Rv0164
Rv0116c	Rv0094c	Rv0118c	Rv0101	Rv0093c	Rv0103c	Rv0144	Rv0165c
Rv0117	Rv0095c	Rv0119	Rv0102	Rv0094c	Rv0104	Rv0145	Rv0166
Rv0118c	Rv0096	Rv0120c	Rv0103c	Rv0095c	Rv0105c	Rv0146	Rv0168
Rv0121c	Rv0097	Rv0124	Rv0104	Rv0096	Rv0106	Rv0147	Rv0169
Rv0122	Rv0099	Rv0126	Rv0105c	Rv0097	Rv0107c	Rv0148	Rv0173
Rv0123	Rv0100	Rv0127	Rv0106	Rv0098	Rv0108c	Rv0153c	Rv0176
Rv0125	Rv0101	Rv0129c	Rv0107c	Rv0099	Rv0110	Rv0154c	Rv0177
Rv0126	Rv0102	Rv0130	Rv0110	Rv0101	Rv0111	Rv0155	Rv0179c
Rv0127	Rv0103c	Rv0131c	Rv0111	Rv0102	Rv0112	Rv0157	Rv0180c
Rv0128	Rv0104	Rv0132c	Rv0112	Rv0103c	Rv0113	Rv0158	Rv0182c
Rv0129c	Rv0105c	Rv0133	Rv0115	Rv0104	Rv0115	Rv0161	Rv0183
Rv0130	Rv0106	Rv0134	Rv0116c	Rv0105c	Rv0116c	Rv0162c	Rv0184
Rv0131c	Rv0107c	Rv0135c	Rv0117	Rv0106	Rv0117	Rv0163	Rv0186
Rv0132c	Rv0110	Rv0136	Rv0118c	Rv0107c	Rv0118c	Rv0164	Rv0187
Rv0133	Rv0111	Rv0137c	Rv0119	Rv0108c	Rv0119	Rv0165c	Rv0189c
Rv0135c	Rv0112	Rv0138	Rv0120c	Rv0110	Rv0120c	Rv0166	Rv0196
Rv0136	Rv0114	Rv0139	Rv0123	Rv0111	Rv0121c	Rv0167	Rv0198c
Rv0137c	Rv0115	Rv0142	Rv0124	Rv0112	Rv0123	Rv0168	Rv0199
Rv0139	Rv0116c	Rv0144	Rv0126	Rv0114	Rv0127	Rv0169	Rv0202c
Rv0142	Rv0117	Rv0145	Rv0127	Rv0115	Rv0128	Rv0170	Rv0207c
Rv0143c	Rv0118c	Rv0146	Rv0128	Rv0116c	Rv0129c	Rv0171	Rv0208c
Rv0144	Rv0119	Rv0147	Rv0129c	Rv0117	Rv0130	Rv0172	Rv0209
Rv0146	Rv0120c	Rv0153c	Rv0130	Rv0118c	Rv0131c	Rv0174	Rv0210
Rv0147	Rv0121c	Rv0154c	Rv0131c	Rv0119	Rv0132c	Rv0175	Rv0211
Rv0148	Rv0122	Rv0155	Rv0132c	Rv0120c	Rv0133	Rv0176	Rv0212c
Rv0151c	Rv0123	Rv0156	Rv0133	Rv0121c	Rv0135c	Rv0177	Rv0213c
Rv0153c	Rv0125	Rv0157	Rv0134	Rv0122	Rv0136	Rv0178	Rv0214
Rv0154c	Rv0126	Rv0158	Rv0135c	Rv0123	Rv0137c	Rv0181c	Rv0215c
Rv0155	Rv0127	Rv0159c	Rv0136	Rv0124	Rv0138	Rv0182c	Rv0216
Rv0157	Rv0128	Rv0160c	Rv0138	Rv0126	Rv0139	Rv0183	Rv0217c
Rv0158	Rv0129c	Rv0161	Rv0139	Rv0127	Rv0140	Rv0184	Rv0220
Rv0161	Rv0130	Rv0162c	Rv0142	Rv0128	Rv0141c	Rv0185	Rv0222
Rv0162c	Rv0131c	Rv0163	Rv0143c	Rv0129c	Rv0142	Rv0186	Rv0223c
Rv0163	Rv0132c	Rv0164	Rv0144	Rv0130	Rv0143c	Rv0187	Rv0225
Rv0164	Rv0133	Rv0165c	Rv0145	Rv0131c	Rv0144	Rv0189c	Rv0226c
Rv0165c	Rv0134	Rv0166	Rv0146	Rv0132c	Rv0145	Rv0190	Rv0227c
Rv0166	Rv0135c	Rv0167	Rv0147	Rv0133	Rv0146	Rv0191	Rv0231
Rv0167	Rv0136	Rv0168	Rv0148	Rv0135c	Rv0147	Rv0196	Rv0232
Rv0168	Rv0137c	Rv0169	Rv0152c	Rv0136	Rv0148	Rv0197	Rv0243
Rv0169	Rv0138	Rv0170	Rv0153c	Rv0138	Rv0150c	Rv0198c	Rv0244c
Rv0173	Rv0139	Rv0171	Rv0154c	Rv0139	Rv0151c	Rv0199	Rv0246
Rv0174	Rv0141c	Rv0172	Rv0155	Rv0142	Rv0153c	Rv0201c	Rv0248c
Rv0176	Rv0142	Rv0173	Rv0156	Rv0143c	Rv0154c	Rv0202c	Rv0250c
Rv0177	Rv0143c	Rv0174	Rv0157	Rv0144	Rv0155	Rv0204c	Rv0251c
Rv0178	Rv0144	Rv0175	Rv0158	Rv0145	Rv0157	Rv0205	Rv0252
Rv0179c	Rv0145	Rv0176	Rv0160c	Rv0146	Rv0158	Rv0206c	Rv0255c
Rv0180c	Rv0146	Rv0177	Rv0161	Rv0147	Rv0159c	Rv0207c	Rv0257
Rv0182c	Rv0147	Rv0179c	Rv0162c	Rv0148	Rv0160c	Rv0208c	Rv0258c
Rv0183	Rv0148	Rv0180c	Rv0163	Rv0149	Rv0161	Rv0209	Rv0259c
Rv0184	Rv0149	Rv0182c	Rv0164	Rv0151c	Rv0162c	Rv0210	Rv0260c
Rv0185	Rv0151c	Rv0183	Rv0165c	Rv0152c	Rv0163	Rv0211	Rv0263c
Rv0186	Rv0153c	Rv0184	Rv0166	Rv0153c	Rv0164	Rv0214	Rv0265c
Rv0187	Rv0154c	Rv0186	Rv0168	Rv0154c	Rv0165c	Rv0215c	Rv0266c
Rv0189c	Rv0155	Rv0187	Rv0169	Rv0155	Rv0166	Rv0216	Rv0267
Rv0191	Rv0157	Rv0189c	Rv0170	Rv0156	Rv0167	Rv0217c	Rv0268c
Rv0196	Rv0158	Rv0190	Rv0171	Rv0157	Rv0169	Rv0218	Rv0269c
Rv0198c	Rv0159c	Rv0191	Rv0172	Rv0158	Rv0170	Rv0219	Rv0270
Rv0199	Rv0161	Rv0193c	Rv0173	Rv0159c	Rv0171	Rv0220	Rv0271c
Rv0200	Rv0162c	Rv0194	Rv0175	Rv0160c	Rv0172	Rv0221	Rv0272c
Rv0201c	Rv0163	Rv0196	Rv0176	Rv0161	Rv0173	Rv0222	Rv0273c
Rv0202c	Rv0164	Rv0197	Rv0177	Rv0162c	Rv0174	Rv0223c	Rv0276
Rv0203	Rv0165c	Rv0198c	Rv0178	Rv0163	Rv0175	Rv0224c	Rv0281
Rv0207c	Rv0166	Rv0199	Rv0179c	Rv0164	Rv0176	Rv0225	Rv0282
Rv0208c	Rv0168	Rv0202c	Rv0180c	Rv0165c	Rv0177	Rv0226c	Rv0283
Rv0209	Rv0169	Rv0204c	Rv0181c	Rv0166	Rv0178	Rv0227c	Rv0284
Rv0210	Rv0170	Rv0205	Rv0182c	Rv0168	Rv0179c	Rv0228	Rv0286
Rv0211	Rv0171	Rv0206c	Rv0183	Rv0169	Rv0180c	Rv0230c	Rv0291
Rv0212c	Rv0172	Rv0207c	Rv0184	Rv0170	Rv0181c	Rv0231	Rv0292
Rv0213c	Rv0173	Rv0208c	Rv0185	Rv0171	Rv0182c	Rv0232	Rv0299
Rv0214	Rv0174	Rv0209	Rv0186	Rv0172	Rv0183	Rv0233	Rv0302
Rv0215c	Rv0175	Rv0210	Rv0187	Rv0173	Rv0184	Rv0234c	Rv0306
Rv0216	Rv0176	Rv0211	Rv0189c	Rv0174	Rv0185	Rv0235c	Rv0307c
Rv0217c	Rv0177	Rv0212c	Rv0190	Rv0175	Rv0186	Rv0236c	Rv0312
Rv0218	Rv0178	Rv0213c	Rv0192	Rv0176	Rv0187	Rv0237	Rv0317c
Rv0220	Rv0179c	Rv0214	Rv0193c	Rv0177	Rv0188	Rv0238	Rv0318c
Rv0222	Rv0180c	Rv0215c	Rv0194	Rv0178	Rv0189c	Rv0241c	Rv0319
Rv0223c	Rv0181c	Rv0216	Rv0195	Rv0179c	Rv0190	Rv0242c	Rv0320
Rv0224c	Rv0182c	Rv0217c	Rv0196	Rv0180c	Rv0191	Rv0243	Rv0321
Rv0225	Rv0183	Rv0220	Rv0197	Rv0181c	Rv0192	Rv0244c	Rv0322
Rv0226c	Rv0184	Rv0221	Rv0198c	Rv0182c	Rv0194	Rv0245	Rv0324
Rv0227c	Rv0185	Rv0222	Rv0199	Rv0183	Rv0196	Rv0247c	Rv0328
Rv0228	Rv0186	Rv0223c	Rv0200	Rv0184	Rv0197	Rv0248c	Rv0330c
Rv0229c	Rv0187	Rv0225	Rv0201c	Rv0185	Rv0198c	Rv0249c	Rv0334
Rv0230c	Rv0189c	Rv0226c	Rv0202c	Rv0186	Rv0199	Rv0250c	Rv0335c
Rv0231	Rv0190	Rv0227c	Rv0204c	Rv0187	Rv0201c	Rv0251c	Rv0337c
Rv0232	Rv0191	Rv0229c	Rv0205	Rv0189c	Rv0202c	Rv0252	Rv0338c
Rv0233	Rv0192	Rv0231	Rv0206c	Rv0190	Rv0203	Rv0255c	Rv0339c
Rv0235c	Rv0193c	Rv0232	Rv0207c	Rv0191	Rv0204c	Rv0256c	Rv0342
Rv0238	Rv0194	Rv0234c	Rv0208c	Rv0192	Rv0205	Rv0258c	Rv0343
Rv0239	Rv0196	Rv0236A	Rv0209	Rv0193c	Rv0206c	Rv0259c	Rv0344c
Rv0240	Rv0197	Rv0236c	Rv0210	Rv0194	Rv0207c	Rv0260c	Rv0345
Rv0241c	Rv0198c	Rv0237	Rv0211	Rv0195	Rv0208c	Rv0263c	Rv0346c
Rv0242c	Rv0199	Rv0241c	Rv0212c	Rv0196	Rv0209	Rv0264c	Rv0347
Rv0243	Rv0200	Rv0243	Rv0213c	Rv0197	Rv0210	Rv0265c	Rv0350
Rv0244c	Rv0201c	Rv0244c	Rv0214	Rv0198c	Rv0211	Rv0267	Rv0351
Rv0245	Rv0202c	Rv0246	Rv0215c	Rv0200	Rv0212c	Rv0269c	Rv0352
Rv0246	Rv0203	Rv0247c	Rv0216	Rv0201c	Rv0213c	Rv0270	Rv0357c
Rv0247c	Rv0204c	Rv0248c	Rv0217c	Rv0202c	Rv0214	Rv0271c	Rv0362
Rv0248c	Rv0205	Rv0249c	Rv0218	Rv0203	Rv0215c	Rv0272c	Rv0363c
Rv0249c	Rv0206c	Rv0250c	Rv0219	Rv0204c	Rv0216	Rv0273c	Rv0365c
Rv0250c	Rv0207c	Rv0251c	Rv0220	Rv0206c	Rv0217c	Rv0274	Rv0367c
Rv0251c	Rv0208c	Rv0252	Rv0221	Rv0207c	Rv0218	Rv0275c	Rv0368c
Rv0252	Rv0209	Rv0253	Rv0222	Rv0208c	Rv0219	Rv0276	Rv0369c
Rv0253	Rv0210	Rv0254c	Rv0223c	Rv0209	Rv0220	Rv0280	Rv0373c
Rv0255c	Rv0211	Rv0255c	Rv0224c	Rv0210	Rv0221	Rv0281	Rv0375c
Rv0257	Rv0212c	Rv0257	Rv0225	Rv0211	Rv0223c	Rv0282	Rv0381c
Rv0258c	Rv0213c	Rv0258c	Rv0226c	Rv0212c	Rv0225	Rv0283	Rv0382c
Rv0259c	Rv0214	Rv0259c	Rv0227c	Rv0213c	Rv0226c	Rv0286	Rv0383c
Rv0260c	Rv0215c	Rv0260c	Rv0228	Rv0214	Rv0227c	Rv0289	Rv0384c
Rv0262c	Rv0216	Rv0263c	Rv0231	Rv0215c	Rv0228	Rv0290	Rv0385
Rv0263c	Rv0217c	Rv0264c	Rv0232	Rv0217c	Rv0230c	Rv0291	Rv0389
Rv0265c	Rv0218	Rv0265c	Rv0233	Rv0218	Rv0231	Rv0292	Rv0390
Rv0266c	Rv0220	Rv0266c	Rv0234c	Rv0220	Rv0232	Rv0293c	Rv0391
Rv0267	Rv0221	Rv0267	Rv0235c	Rv0221	Rv0233	Rv0294	Rv0392c
Rv0268c	Rv0222	Rv0268c	Rv0236A	Rv0223c	Rv0234c	Rv0295c	Rv0393
Rv0269c	Rv0223c	Rv0269c	Rv0236c	Rv0224c	Rv0235c	Rv0296c	Rv0399c
Rv0270	Rv0224c	Rv0270	Rv0237	Rv0225	Rv0236c	Rv0306	Rv0400c
Rv0271c	Rv0225	Rv0271c	Rv0238	Rv0226c	Rv0237	Rv0308	Rv0402c
Rv0272c	Rv0226c	Rv0272c	Rv0239	Rv0227c	Rv0238	Rv0309	Rv0404
Rv0273c	Rv0227c	Rv0273c	Rv0242c	Rv0228	Rv0239	Rv0310c	Rv0407
Rv0275c	Rv0228	Rv0275c	Rv0243	Rv0229c	Rv0241c	Rv0311	Rv0408
Rv0276	Rv0229c	Rv0276	Rv0244c	Rv0230c	Rv0242c	Rv0312	Rv0410c
Rv0277c	Rv0230c	Rv0281	Rv0245	Rv0231	Rv0243	Rv0313	Rv0411c
Rv0281	Rv0231	Rv0282	Rv0246	Rv0232	Rv0244c	Rv0314c	Rv0412c
Rv0282	Rv0232	Rv0283	Rv0247c	Rv0233	Rv0245	Rv0315	Rv0415
Rv0283	Rv0233	Rv0284	Rv0248c	Rv0234c	Rv0246	Rv0316	Rv0417
Rv0284	Rv0234c	Rv0286	Rv0250c	Rv0235c	Rv0247c	Rv0321	Rv0418
Rv0286	Rv0235c	Rv0288	Rv0251c	Rv0236A	Rv0248c	Rv0322	Rv0419
Rv0287	Rv0236c	Rv0291	Rv0252	Rv0236c	Rv0249c	Rv0323c	Rv0421c
Rv0289	Rv0237	Rv0292	Rv0253	Rv0237	Rv0250c	Rv0329c	Rv0422c
Rv0290	Rv0238	Rv0294	Rv0254c	Rv0238	Rv0251c	Rv0332	Rv0423c
Rv0291	Rv0240	Rv0296c	Rv0255c	Rv0239	Rv0252	Rv0333	Rv0426c
Rv0292	Rv0241c	Rv0297	Rv0256c	Rv0241c	Rv0253	Rv0334	Rv0427c
Rv0293c	Rv0242c	Rv0299	Rv0257	Rv0242c	Rv0254c	Rv0336	Rv0430
Rv0294	Rv0243	Rv0300	Rv0258c	Rv0243	Rv0255c	Rv0337c	Rv0431
Rv0295c	Rv0244c	Rv0302	Rv0259c	Rv0244c	Rv0256c	Rv0338c	Rv0433
Rv0296c	Rv0245	Rv0305c	Rv0260c	Rv0246	Rv0257	Rv0344c	Rv0434
Rv0299	Rv0246	Rv0306	Rv0262c	Rv0247c	Rv0258c	Rv0350	Rv0435c
Rv0301	Rv0248c	Rv0307c	Rv0263c	Rv0248c	Rv0259c	Rv0351	Rv0436c
Rv0302	Rv0249c	Rv0312	Rv0264c	Rv0249c	Rv0260c	Rv0352	Rv0438c
Rv0303	Rv0250c	Rv0317c	Rv0265c	Rv0250c	Rv0261c	Rv0357c	Rv0439c
Rv0306	Rv0251c	Rv0318c	Rv0266c	Rv0252	Rv0262c	Rv0358	Rv0440
Rv0307c	Rv0252	Rv0319	Rv0267	Rv0253	Rv0263c	Rv0359	Rv0444c
Rv0309	Rv0255c	Rv0320	Rv0268c	Rv0254c	Rv0265c	Rv0360c	Rv0447c
Rv0311	Rv0257	Rv0321	Rv0269c	Rv0255c	Rv0266c	Rv0361	Rv0448c
Rv0312	Rv0258c	Rv0322	Rv0270	Rv0257	Rv0267	Rv0364	Rv0449c
Rv0313	Rv0259c	Rv0324	Rv0271c	Rv0258c	Rv0268c	Rv0365c	Rv0452
Rv0314c	Rv0260c	Rv0326	Rv0272c	Rv0260c	Rv0269c	Rv0366c	Rv0456c
Rv0315	Rv0261c	Rv0327c	Rv0273c	Rv0261c	Rv0270	Rv0367c	Rv0456A
Rv0316	Rv0262c	Rv0328	Rv0275c	Rv0262c	Rv0271c	Rv0380c	Rv0461
Rv0317c	Rv0263c	Rv0330c	Rv0276	Rv0263c	Rv0272c	Rv0382c	Rv0462
Rv0318c	Rv0264c	Rv0332	Rv0281	Rv0264c	Rv0273c	Rv0383c	Rv0464c
Rv0319	Rv0265c	Rv0334	Rv0282	Rv0265c	Rv0275c	Rv0384c	Rv0465c
Rv0320	Rv0266c	Rv0335c	Rv0283	Rv0266c	Rv0276	Rv0385	Rv0466
Rv0321	Rv0267	Rv0336	Rv0284	Rv0267	Rv0277c	Rv0389	Rv0467
Rv0322	Rv0268c	Rv0337c	Rv0286	Rv0268c	Rv0280	Rv0391	Rv0468
Rv0323c	Rv0269c	Rv0338c	Rv0289	Rv0269c	Rv0281	Rv0392c	Rv0471c
Rv0324	Rv0270	Rv0339c	Rv0290	Rv0270	Rv0282	Rv0393	Rv0473
Rv0328	Rv0271c	Rv0342	Rv0291	Rv0271c	Rv0283	Rv0397	Rv0475
Rv0329c	Rv0272c	Rv0343	Rv0292	Rv0272c	Rv0284	Rv0398c	Rv0482
Rv0330c	Rv0273c	Rv0344c	Rv0293c	Rv0273c	Rv0286	Rv0400c	Rv0484c
Rv0331	Rv0274	Rv0345	Rv0295c	Rv0275c	Rv0287	Rv0406c	Rv0485
Rv0332	Rv0276	Rv0346c	Rv0298	Rv0276	Rv0289	Rv0407	Rv0490
Rv0334	Rv0277c	Rv0347	Rv0299	Rv0277c	Rv0290	Rv0408	Rv0492c
Rv0335c	Rv0280	Rv0350	Rv0302	Rv0281	Rv0291	Rv0409	Rv0494
Rv0337c	Rv0281	Rv0351	Rv0303	Rv0282	Rv0292	Rv0410c	Rv0496
Rv0338c	Rv0282	Rv0352	Rv0305c	Rv0283	Rv0293c	Rv0411c	Rv0497
Rv0339c	Rv0283	Rv0355c	Rv0306	Rv0284	Rv0294	Rv0412c	Rv0499
Rv0340	Rv0284	Rv0357c	Rv0307c	Rv0286	Rv0295c	Rv0413	Rv0500
Rv0341	Rv0286	Rv0359	Rv0308	Rv0289	Rv0296c	Rv0414c	Rv0501
Rv0342	Rv0288	Rv0360c	Rv0310c	Rv0290	Rv0297	Rv0415	Rv0502
Rv0343	Rv0289	Rv0362	Rv0311	Rv0291	Rv0298	Rv0416	Rv0505c
Rv0344c	Rv0290	Rv0363c	Rv0312	Rv0292	Rv0299	Rv0417	Rv0506
Rv0345	Rv0291	Rv0365c	Rv0313	Rv0293c	Rv0301	Rv0418	Rv0508
Rv0346c	Rv0292	Rv0366c	Rv0314c	Rv0294	Rv0302	Rv0419	Rv0509
Rv0347	Rv0293c	Rv0367c	Rv0315	Rv0295c	Rv0303	Rv0421c	Rv0510
Rv0348	Rv0294	Rv0368c	Rv0316	Rv0296c	Rv0305c	Rv0422c	Rv0511
Rv0349	Rv0295c	Rv0369c	Rv0317c	Rv0297	Rv0306	Rv0423c	Rv0512
Rv0350	Rv0296c	Rv0373c	Rv0318c	Rv0298	Rv0307c	Rv0424c	Rv0517
Rv0351	Rv0297	Rv0375c	Rv0319	Rv0299	Rv0308	Rv0426c	Rv0518
Rv0352	Rv0299	Rv0380c	Rv0320	Rv0300	Rv0309	Rv0427c	Rv0522
Rv0353	Rv0300	Rv0381c	Rv0321	Rv0301	Rv0310c	Rv0428c	Rv0523c
Rv0356c	Rv0301	Rv0382c	Rv0322	Rv0302	Rv0311	Rv0430	Rv0526
Rv0357c	Rv0302	Rv0383c	Rv0324	Rv0303	Rv0312	Rv0431	Rv0531
Rv0360c	Rv0303	Rv0384c	Rv0325	Rv0305c	Rv0313	Rv0433	Rv0533c
Rv0361	Rv0305c	Rv0385	Rv0326	Rv0306	Rv0315	Rv0434	Rv0538
Rv0362	Rv0306	Rv0386	Rv0327c	Rv0307c	Rv0316	Rv0435c	Rv0539
Rv0363c	Rv0307c	Rv0387c	Rv0328	Rv0308	Rv0317c	Rv0437c	Rv0540
Rv0365c	Rv0308	Rv0388c	Rv0330c	Rv0309	Rv0318c	Rv0438c	Rv0541c
Rv0367c	Rv0309	Rv0389	Rv0331	Rv0310c	Rv0319	Rv0439c	Rv0542c
Rv0368c	Rv0310c	Rv0390	Rv0332	Rv0311	Rv0320	Rv0440	Rv0546c
Rv0369c	Rv0311	Rv0391	Rv0333	Rv0314c	Rv0321	Rv0441c	Rv0547c
Rv0370c	Rv0312	Rv0392c	Rv0334	Rv0315	Rv0322	Rv0442c	Rv0548c
Rv0371c	Rv0313	Rv0393	Rv0335c	Rv0316	Rv0324	Rv0443	Rv0551c
Rv0372c	Rv0314c	Rv0394c	Rv0336	Rv0317c	Rv0326	Rv0450c	Rv0553
Rv0373c	Rv0315	Rv0397	Rv0337c	Rv0318c	Rv0327c	Rv0451c	Rv0554
Rv0374c	Rv0316	Rv0399c	Rv0338c	Rv0319	Rv0328	Rv0452	Rv0556
Rv0375c	Rv0317c	Rv0400c	Rv0339c	Rv0320	Rv0329c	Rv0453	Rv0557
Rv0377	Rv0318c	Rv0402c	Rv0340	Rv0321	Rv0330c	Rv0455c	Rv0558
Rv0381c	Rv0319	Rv0404	Rv0341	Rv0322	Rv0331	Rv0456c	Rv0561c
Rv0382c	Rv0320	Rv0405	Rv0342	Rv0324	Rv0334	Rv0458	Rv0562
Rv0383c	Rv0321	Rv0407	Rv0343	Rv0326	Rv0335c	Rv0462	Rv0566c
Rv0384c	Rv0322	Rv0408	Rv0344c	Rv0327c	Rv0337c	Rv0464c	Rv0567
Rv0385	Rv0323c	Rv0410c	Rv0345	Rv0328	Rv0338c	Rv0465c	Rv0568
Rv0387c	Rv0324	Rv0411c	Rv0346c	Rv0329c	Rv0339c	Rv0466	Rv0570
Rv0389	Rv0325	Rv0412c	Rv0347	Rv0330c	Rv0342	Rv0467	Rv0572c
Rv0390	Rv0326	Rv0413	Rv0348	Rv0331	Rv0343	Rv0468	Rv0574c
Rv0391	Rv0327c	Rv0415	Rv0349	Rv0332	Rv0345	Rv0469	Rv0575c
Rv0392c	Rv0328	Rv0417	Rv0350	Rv0333	Rv0346c	Rv0470c	Rv0579
Rv0393	Rv0329c	Rv0418	Rv0351	Rv0334	Rv0348	Rv0473	Rv0580c
Rv0394c	Rv0330c	Rv0419	Rv0352	Rv0335c	Rv0349	Rv0474	Rv0582
Rv0395	Rv0331	Rv0421c	Rv0354c	Rv0337c	Rv0350	Rv0475	Rv0584
Rv0396	Rv0334	Rv0422c	Rv0356c	Rv0338c	Rv0351	Rv0476	Rv0585c
Rv0397	Rv0335c	Rv0423c	Rv0357c	Rv0339c	Rv0352	Rv0478	Rv0586
Rv0398c	Rv0336	Rv0425c	Rv0358	Rv0340	Rv0356c	Rv0479c	Rv0588
Rv0399c	Rv0337c	Rv0426c	Rv0359	Rv0342	Rv0357c	Rv0480c	Rv0589
Rv0400c	Rv0338c	Rv0427c	Rv0362	Rv0343	Rv0358	Rv0481c	Rv0590
Rv0402c	Rv0339c	Rv0430	Rv0363c	Rv0344c	Rv0359	Rv0482	Rv0591
Rv0404	Rv0340	Rv0431	Rv0365c	Rv0345	Rv0360c	Rv0483	Rv0593
Rv0406c	Rv0342	Rv0433	Rv0366c	Rv0346c	Rv0361	Rv0484c	Rv0594
Rv0407	Rv0343	Rv0434	Rv0367c	Rv0347	Rv0362	Rv0485	Rv0597c
Rv0408	Rv0344c	Rv0435c	Rv0368c	Rv0348	Rv0363c	Rv0486	Rv0600c
Rv0410c	Rv0345	Rv0436c	Rv0369c	Rv0349	Rv0364	Rv0487	Rv0602c
Rv0411c	Rv0346c	Rv0438c	Rv0370c	Rv0350	Rv0365c	Rv0489	Rv0604
Rv0412c	Rv0347	Rv0439c	Rv0371c	Rv0351	Rv0367c	Rv0490	Rv0610c
Rv0414c	Rv0348	Rv0440	Rv0372c	Rv0352	Rv0368c	Rv0491	Rv0612
Rv0415	Rv0349	Rv0441c	Rv0373c	Rv0353	Rv0369c	Rv0492c	Rv0616c
Rv0417	Rv0350	Rv0444c	Rv0374c	Rv0355c	Rv0371c	Rv0493c	Rv0623
Rv0418	Rv0351	Rv0446c	Rv0375c	Rv0356c	Rv0372c	Rv0495c	Rv0624
Rv0419	Rv0352	Rv0447c	Rv0376c	Rv0357c	Rv0373c	Rv0496	Rv0625c
Rv0420c	Rv0353	Rv0448c	Rv0377	Rv0358	Rv0375c	Rv0497	Rv0626
Rv0421c	Rv0355c	Rv0449c	Rv0378	Rv0361	Rv0376c	Rv0499	Rv0629c
Rv0422c	Rv0356c	Rv0450c	Rv0379	Rv0362	Rv0380c	Rv0500	Rv0630c
Rv0423c	Rv0357c	Rv0451c	Rv0380c	Rv0363c	Rv0381c	Rv0500A	Rv0633c
Rv0424c	Rv0358	Rv0452	Rv0381c	Rv0365c	Rv0382c	Rv0501	Rv0634c
Rv0426c	Rv0359	Rv0455c	Rv0382c	Rv0366c	Rv0383c	Rv0502	Rv0634A
Rv0427c	Rv0360c	Rv0456A	Rv0383c	Rv0368c	Rv0384c	Rv0503c	Rv0640
Rv0428c	Rv0361	Rv0456c	Rv0384c	Rv0369c	Rv0385	Rv0504c	Rv0641
Rv0429c	Rv0362	Rv0457c	Rv0385	Rv0370c	Rv0386	Rv0505c	Rv0645c
Rv0430	Rv0363c	Rv0461	Rv0386	Rv0371c	Rv0387c	Rv0506	Rv0646c
Rv0431	Rv0364	Rv0462	Rv0389	Rv0372c	Rv0388c	Rv0509	Rv0649
Rv0433	Rv0365c	Rv0464c	Rv0390	Rv0373c	Rv0389	Rv0510	Rv0651
Rv0434	Rv0366c	Rv0465c	Rv0391	Rv0374c	Rv0391	Rv0511	Rv0652
Rv0435c	Rv0367c	Rv0466	Rv0392c	Rv0375c	Rv0392c	Rv0512	Rv0653c
Rv0436c	Rv0368c	Rv0467	Rv0393	Rv0376c	Rv0393	Rv0513	Rv0654
Rv0437c	Rv0369c	Rv0468	Rv0395	Rv0377	Rv0395	Rv0515	Rv0659c
Rv0438c	Rv0370c	Rv0469	Rv0396	Rv0379	Rv0398c	Rv0516c	Rv0662c
Rv0439c	Rv0371c	Rv0470c	Rv0398c	Rv0381c	Rv0399c	Rv0517	Rv0663
Rv0440	Rv0372c	Rv0471c	Rv0399c	Rv0382c	Rv0400c	Rv0518	Rv0665
Rv0443	Rv0373c	Rv0472c	Rv0400c	Rv0383c	Rv0403c	Rv0519c	Rv0668
Rv0444c	Rv0375c	Rv0473	Rv0401	Rv0384c	Rv0404	Rv0522	Rv0669c
Rv0445c	Rv0376c	Rv0475	Rv0402c	Rv0385	Rv0405	Rv0523c	Rv0671
Rv0447c	Rv0377	Rv0478	Rv0403c	Rv0386	Rv0406c	Rv0524	Rv0675
Rv0448c	Rv0378	Rv0481c	Rv0404	Rv0387c	Rv0407	Rv0525	Rv0678
Rv0449c	Rv0379	Rv0482	Rv0405	Rv0388c	Rv0408	Rv0526	Rv0681
Rv0452	Rv0380c	Rv0484c	Rv0406c	Rv0389	Rv0409	Rv0528	Rv0682
Rv0456c	Rv0381c	Rv0485	Rv0407	Rv0391	Rv0410c	Rv0529	Rv0683
Rv0456A	Rv0382c	Rv0486	Rv0408	Rv0392c	Rv0411c	Rv0530	Rv0684
Rv0457c	Rv0383c	Rv0487	Rv0409	Rv0393	Rv0412c	Rv0531	Rv0686
Rv0458	Rv0384c	Rv0488	Rv0410c	Rv0394c	Rv0413	Rv0533c	Rv0690c
Rv0461	Rv0385	Rv0490	Rv0411c	Rv0395	Rv0414c	Rv0534c	Rv0693
Rv0462	Rv0386	Rv0492c	Rv0412c	Rv0397	Rv0415	Rv0535	Rv0694
Rv0464c	Rv0389	Rv0493c	Rv0413	Rv0398c	Rv0416	Rv0536	Rv0697
Rv0465c	Rv0390	Rv0494	Rv0414c	Rv0399c	Rv0418	Rv0537c	Rv0701
Rv0466	Rv0391	Rv0496	Rv0415	Rv0400c	Rv0419	Rv0538	Rv0702
Rv0467	Rv0392c	Rv0497	Rv0417	Rv0401	Rv0420c	Rv0539	Rv0704
Rv0468	Rv0393	Rv0498	Rv0418	Rv0402c	Rv0421c	Rv0540	Rv0705
Rv0470c	Rv0395	Rv0499	Rv0419	Rv0403c	Rv0422c	Rv0541c	Rv0706
Rv0470.1	Rv0397	Rv0500	Rv0420c	Rv0404	Rv0423c	Rv0542c	Rv0707
Rv0471c	Rv0398c	Rv0500A	Rv0421c	Rv0405	Rv0425c	Rv0543c	Rv0710
Rv0473	Rv0399c	Rv0500B	Rv0422c	Rv0406c	Rv0426c	Rv0546c	Rv0711
Rv0474	Rv0400c	Rv0501	Rv0423c	Rv0407	Rv0428c	Rv0547c	Rv0714
Rv0475	Rv0401	Rv0502	Rv0425c	Rv0408	Rv0430	Rv0548c	Rv0715
Rv0478	Rv0402c	Rv0503c	Rv0426c	Rv0409	Rv0431	Rv0551c	Rv0718
Rv0479c	Rv0403c	Rv0505c	Rv0427c	Rv0410c	Rv0433	Rv0552	Rv0719
Rv0481c	Rv0404	Rv0506	Rv0428c	Rv0411c	Rv0434	Rv0553	Rv0720
Rv0482	Rv0405	Rv0507	Rv0430	Rv0412c	Rv0435c	Rv0554	Rv0723
Rv0483	Rv0406c	Rv0508	Rv0431	Rv0413	Rv0436c	Rv0555	Rv0724
Rv0484c	Rv0407	Rv0509	Rv0433	Rv0414c	Rv0437c	Rv0557	Rv0725c
Rv0485	Rv0408	Rv0510	Rv0434	Rv0415	Rv0438c	Rv0558	Rv0726c
Rv0487	Rv0409	Rv0511	Rv0435c	Rv0417	Rv0439c	Rv0560c	Rv0727c
Rv0488	Rv0410c	Rv0512	Rv0436c	Rv0418	Rv0440	Rv0561c	Rv0729
Rv0489	Rv0411c	Rv0514	Rv0438c	Rv0419	Rv0441c	Rv0562	Rv0731c
Rv0490	Rv0412c	Rv0516c	Rv0439c	Rv0420c	Rv0442c	Rv0563	Rv0732
Rv0491	Rv0413	Rv0517	Rv0440	Rv0421c	Rv0443	Rv0564c	Rv0733
Rv0492c	Rv0414c	Rv0518	Rv0441c	Rv0422c	Rv0444c	Rv0565c	Rv0734
Rv0492.1	Rv0415	Rv0519c	Rv0444c	Rv0423c	Rv0445c	Rv0566c	Rv0735
Rv0494	Rv0417	Rv0521	Rv0445c	Rv0425c	Rv0447c	Rv0579	Rv0737
Rv0495c	Rv0418	Rv0522	Rv0447c	Rv0426c	Rv0448c	Rv0584	Rv0741
Rv0496	Rv0419	Rv0523c	Rv0448c	Rv0427c	Rv0449c	Rv0585c	Rv0743c
Rv0497	Rv0420c	Rv0526	Rv0449c	Rv0428c	Rv0450c	Rv0588	Rv0748
Rv0498	Rv0421c	Rv0528	Rv0450c	Rv0430	Rv0451c	Rv0590	Rv0751c
Rv0499	Rv0422c	Rv0529	Rv0452	Rv0431	Rv0452	Rv0591	Rv0752c
Rv0500	Rv0423c	Rv0531	Rv0454	Rv0433	Rv0454	Rv0592	Rv0753c
Rv0501	Rv0425c	Rv0533c	Rv0455c	Rv0434	Rv0456A	Rv0593	Rv0758
Rv0502	Rv0426c	Rv0538	Rv0456A	Rv0435c	Rv0456c	Rv0594	Rv0762c
Rv0504c	Rv0427c	Rv0539	Rv0456c	Rv0436c	Rv0457c	Rv0600c	Rv0764c
Rv0505c	Rv0428c	Rv0540	Rv0458	Rv0437c	Rv0458	Rv0602c	Rv0765c
Rv0506	Rv0429c	Rv0541c	Rv0461	Rv0438c	Rv0459	Rv0614	Rv0767c
Rv0508	Rv0430	Rv0542c	Rv0462	Rv0439c	Rv0461	Rv0618	Rv0768
Rv0509	Rv0431	Rv0543c	Rv0464c	Rv0440	Rv0462	Rv0619	Rv0769
Rv0510	Rv0432	Rv0545c	Rv0465c	Rv0441c	Rv0464c	Rv0620	Rv0770
Rv0511	Rv0433	Rv0546c	Rv0466	Rv0442c	Rv0465c	Rv0625c	Rv0772
Rv0512	Rv0434	Rv0547c	Rv0467	Rv0443	Rv0466	Rv0629c	Rv0773c
Rv0513	Rv0435c	Rv0548c	Rv0468	Rv0444c	Rv0467	Rv0630c	Rv0774c
Rv0514	Rv0436c	Rv0551c	Rv0469	Rv0445c	Rv0468	Rv0631c	Rv0775
Rv0516c	Rv0437c	Rv0552	Rv0470.1	Rv0446c	Rv0469	Rv0632c	Rv0777
Rv0517	Rv0438c	Rv0553	Rv0471c	Rv0447c	Rv0470c	Rv0633c	Rv0778
Rv0518	Rv0439c	Rv0554	Rv0472c	Rv0448c	Rv0471c	Rv0634A	Rv0779c
Rv0520	Rv0440	Rv0555	Rv0473	Rv0449c	Rv0472c	Rv0634B	Rv0780
Rv0522	Rv0441c	Rv0556	Rv0474	Rv0450c	Rv0473	Rv0635	Rv0784
Rv0523c	Rv0443	Rv0557	Rv0475	Rv0452	Rv0474	Rv0636	Rv0785
Rv0524	Rv0444c	Rv0558	Rv0477	Rv0453	Rv0475	Rv0637	Rv0787
Rv0525	Rv0445c	Rv0561c	Rv0479c	Rv0454	Rv0476	Rv0638	Rv0788
Rv0526	Rv0446c	Rv0562	Rv0480c	Rv0455c	Rv0478	Rv0639	Rv0789c
Rv0527	Rv0447c	Rv0563	Rv0482	Rv0456A	Rv0480c	Rv0640	Rv0792c
Rv0528	Rv0448c	Rv0564c	Rv0483	Rv0456c	Rv0482	Rv0641	Rv0799c
Rv0530	Rv0449c	Rv0566c	Rv0484c	Rv0457c	Rv0483	Rv0644c	Rv0800
Rv0531	Rv0450c	Rv0567	Rv0485	Rv0458	Rv0484c	Rv0645c	Rv0802c
Rv0533c	Rv0452	Rv0568	Rv0486	Rv0461	Rv0485	Rv0646c	Rv0803
Rv0534c	Rv0453	Rv0569	Rv0488	Rv0462	Rv0486	Rv0648	Rv0804
Rv0535	Rv0454	Rv0570	Rv0489	Rv0464c	Rv0487	Rv0649	Rv0805
Rv0536	Rv0456A	Rv0572c	Rv0490	Rv0465c	Rv0488	Rv0651	Rv0806c
Rv0537c	Rv0456c	Rv0574c	Rv0491	Rv0466	Rv0489	Rv0652	Rv0808
Rv0538	Rv0457c	Rv0575c	Rv0492.1	Rv0467	Rv0490	Rv0654	Rv0809
Rv0539	Rv0458	Rv0578c	Rv0492c	Rv0468	Rv0491	Rv0655	Rv0811c
Rv0540	Rv0459	Rv0579	Rv0493c	Rv0469	Rv0492c	Rv0663	Rv0812
Rv0541c	Rv0461	Rv0580c	Rv0494	Rv0470c	Rv0493c	Rv0667	Rv0813c
Rv0542c	Rv0462	Rv0582	Rv0495c	Rv0471c	Rv0494	Rv0668	Rv0815c
Rv0544c	Rv0464c	Rv0583c	Rv0496	Rv0472c	Rv0495c	Rv0670	Rv0817c
Rv0545c	Rv0465c	Rv0584	Rv0497	Rv0473	Rv0496	Rv0671	Rv0820
Rv0546c	Rv0466	Rv0585c	Rv0499	Rv0474	Rv0497	Rv0672	Rv0822c
Rv0547c	Rv0467	Rv0586	Rv0500	Rv0476	Rv0498	Rv0673	Rv0823c
Rv0548c	Rv0468	Rv0587	Rv0500A	Rv0478	Rv0499	Rv0674	Rv0824c
Rv0549c	Rv0469	Rv0588	Rv0501	Rv0479c	Rv0500	Rv0675	Rv0826
Rv0551c	Rv0470.1	Rv0589	Rv0502	Rv0480c	Rv0500A	Rv0676c	Rv0827c
Rv0553	Rv0470c	Rv0590	Rv0503c	Rv0481c	Rv0501	Rv0678	Rv0831c
Rv0554	Rv0471c	Rv0591	Rv0505c	Rv0482	Rv0502	Rv0679c	Rv0795
Rv0556	Rv0472c	Rv0593	Rv0506	Rv0483	Rv0503c	Rv0680c	Rv2815c
Rv0557	Rv0473	Rv0594	Rv0507	Rv0484c	Rv0505c	Rv0681	Rv3186
Rv0558	Rv0474	Rv0597c	Rv0508	Rv0485	Rv0506	Rv0682	Rv2168c
Rv0559c	Rv0475	Rv0598c	Rv0509	Rv0486	Rv0507	Rv0683	Rv2105
Rv0560c	Rv0476	Rv0599c	Rv0510	Rv0487	Rv0508	Rv0684	Rv2354
Rv0561c	Rv0478	Rv0600c	Rv0511	Rv0489	Rv0509	Rv0685	Rv3325
Rv0562	Rv0479c	Rv0602c	Rv0512	Rv0490	Rv0510	Rv0686	Rv3474
Rv0563	Rv0480c	Rv0604	Rv0513	Rv0491	Rv0511	Rv0687	Rv1370c
Rv0565c	Rv0481c	Rv0607	Rv0515	Rv0492c	Rv0512	Rv0688	Rv2648
Rv0566c	Rv0482	Rv0608	Rv0517	Rv0493c	Rv0513	Rv0690c	Rv2278
Rv0567	Rv0484c	Rv0609.1	Rv0518	Rv0494	Rv0515	Rv0691c	Rv3184
Rv0568	Rv0485	Rv0610c	Rv0519c	Rv0495c	Rv0517	Rv0693	Rv1763
Rv0570	Rv0486	Rv0612	Rv0521	Rv0496	Rv0518	Rv0694	Rv2480c
Rv0571c	Rv0487	Rv0613c	Rv0522	Rv0497	Rv0519c	Rv0695	Rv1757c
Rv0572c	Rv0489	Rv0614	Rv0523c	Rv0499	Rv0520	Rv0696	Rv3381c
Rv0573c	Rv0490	Rv0616c	Rv0524	Rv0500	Rv0521	Rv0697	Rv0837c
Rv0574c	Rv0491	Rv0618	Rv0525	Rv0500A	Rv0522	Rv0700	Rv0838
Rv0575c	Rv0492c	Rv0620	Rv0526	Rv0501	Rv0523c	Rv0701	Rv0840c
Rv0576	Rv0493c	Rv0623	Rv0530	Rv0502	Rv0524	Rv0702	Rv0842
Rv0577	Rv0494	Rv0624	Rv0531	Rv0503c	Rv0525	Rv0703	Rv0843
Rv3514	Rv0495c	Rv0625c	Rv0533c	Rv0504c	Rv0526	Rv0704	Rv0845
Rv0579	Rv0496	Rv0626	Rv0534c	Rv0506	Rv0528	Rv0705	Rv0852
Rv0580c	Rv0497	Rv0629c	Rv0536	Rv0507	Rv0529	Rv0706	Rv0853c
Rv0582	Rv0498	Rv0630c	Rv0537c	Rv0508	Rv0530	Rv0707	Rv0855
Rv0584	Rv0499	Rv0631c	Rv0538	Rv0509	Rv0531	Rv0708	Rv0856
Rv0585c	Rv0500	Rv0633c	Rv0539	Rv0510	Rv0533c	Rv0709	Rv0858c
Rv0586	Rv0501	Rv0634A	Rv0540	Rv0511	Rv0536	Rv0710	Rv0860
Rv0588	Rv0502	Rv0634B	Rv0541c	Rv0512	Rv0537c	Rv0711	Rv0861c
Rv0589	Rv0503c	Rv0634c	Rv0542c	Rv0513	Rv0538	Rv0713	Rv0862c
Rv0590	Rv0505c	Rv0640	Rv0543c	Rv0514	Rv0539	Rv0714	Rv0864
Rv0591	Rv0506	Rv0641	Rv0544c	Rv0515	Rv0540	Rv0715	Rv0869c
Rv0592	Rv0507	Rv0642c	Rv0545c	Rv0516c	Rv0541c	Rv0716	Rv0873
Rv0593	Rv0508	Rv0643c	Rv0546c	Rv0517	Rv0542c	Rv0717	Rv0874c
Rv0594	Rv0509	Rv0644c	Rv0547c	Rv0518	Rv0543c	Rv0718	Rv0876c
Rv0596c	Rv0510	Rv0645c	Rv0548c	Rv0519c	Rv0545c	Rv0719	Rv0880
Rv0597c	Rv0511	Rv0646c	Rv0550c	Rv0520	Rv0547c	Rv0720	Rv0884c
Rv0600c	Rv0512	Rv0648	Rv0551c	Rv0521	Rv0548c	Rv0721	Rv0885
Rv0602c	Rv0513	Rv0649	Rv0552	Rv0522	Rv0549c	Rv0722	Rv0886
Rv0604	Rv0515	Rv0650	Rv0553	Rv0524	Rv0550c	Rv0723	Rv0887c
Rv0605	Rv0516c	Rv0651	Rv0554	Rv0525	Rv0551c	Rv0724	Rv0889c
Rv0606	Rv0517	Rv0652	Rv0555	Rv0526	Rv0552	Rv0724.1	Rv0890c
Rv0609	Rv0518	Rv0653c	Rv0556	Rv0528	Rv0553	Rv0726c	Rv0893c
Rv0610c	Rv0519c	Rv0654	Rv0557	Rv0529	Rv0554	Rv0727c	Rv0894
Rv0611c	Rv0520	Rv0655	Rv0558	Rv0530	Rv0555	Rv0728c	Rv0895
Rv0612	Rv0521	Rv0656c	Rv0560c	Rv0531	Rv0558	Rv0729	Rv0896
Rv0616c	Rv0522	Rv0657c	Rv0561c	Rv0533c	Rv0561c	Rv0730	Rv0897c
Rv0617	Rv0523c	Rv0659c	Rv0562	Rv0534c	Rv0562	Rv0732	Rv0902c
Rv0618	Rv0524	Rv0662c	Rv0564c	Rv0535	Rv0563	Rv0733	Rv0903c
Rv0622	Rv0525	Rv0663	Rv0565c	Rv0536	Rv0564c	Rv0734	Rv0904c
Rv0623	Rv0526	Rv0665	Rv0566c	Rv0537c	Rv0565c	Rv0737	Rv0905
Rv0624	Rv0528	Rv0666	Rv0567	Rv0538	Rv0566c	Rv0738	Rv0907
Rv0625c	Rv0529	Rv0667	Rv0568	Rv0539	Rv0567	Rv0751c	Rv0908
Rv0626	Rv0530	Rv0668	Rv0569	Rv0540	Rv0568	Rv0752c	Rv0910
Rv0627	Rv0531	Rv0669c	Rv0570	Rv0541c	Rv0570	Rv0753c	Rv0913c
Rv0628c	Rv0532	Rv0671	Rv0571c	Rv0542c	Rv0571c	Rv0754	Rv0914c
Rv0629c	Rv0533c	Rv0674	Rv0572c	Rv0545c	Rv0572c	Rv0756c	Rv0915c
Rv0630c	Rv0534c	Rv0675	Rv0573c	Rv0546c	Rv0573c	Rv0757	Rv0919
Rv0632c	Rv0535	Rv0676c	Rv0574c	Rv0547c	Rv0574c	Rv0758	Rv0920c
Rv0633c	Rv0536	Rv0678	Rv0575c	Rv0548c	Rv0575c	Rv0759c	Rv0921
Rv0634c	Rv0537c	Rv0681	Rv0576	Rv0549c	Rv0576	Rv0760c	Rv0922
Rv0634A	Rv0538	Rv0682	Rv0577	Rv0550c	Rv0577	Rv0761c	Rv0923c
Rv0635	Rv0539	Rv0683	Rv0578c	Rv0551c	Rv0578c	Rv0764c	Rv0925c
Rv0636	Rv0540	Rv0684	Rv0579	Rv0552	Rv0580c	Rv0765c	Rv0928
Rv0637	Rv0541c	Rv0685	Rv0580c	Rv0553	Rv0581	Rv0767c	Rv0929
Rv0638	Rv0542c	Rv0686	Rv0581	Rv0554	Rv0582	Rv0768	Rv0930
Rv0639	Rv0543c	Rv0687	Rv0582	Rv0555	Rv0584	Rv0769	Rv0931c
Rv0640	Rv0544c	Rv0690c	Rv0584	Rv0556	Rv0585c	Rv0770	Rv0933
Rv0641	Rv0546c	Rv0692	Rv0585c	Rv0557	Rv0586	Rv0772	Rv0935
Rv0645c	Rv0547c	Rv0693	Rv0586	Rv0558	Rv0587	Rv0773c	Rv0936
Rv0646c	Rv0548c	Rv0694	Rv0588	Rv0560c	Rv0588	Rv0774c	Rv0939
Rv0649	Rv0549c	Rv0696	Rv0589	Rv0561c	Rv0589	Rv0775	Rv0940c
Rv0650	Rv0551c	Rv0697	Rv0590	Rv0562	Rv0590	Rv0776c	Rv0941c
Rv0651	Rv0552	Rv0698	Rv0591	Rv0563	Rv0591	Rv0777	Rv0944
Rv0652	Rv0553	Rv0700	Rv0592	Rv0564c	Rv0592	Rv0778	Rv0945
Rv0653c	Rv0554	Rv0701	Rv0593	Rv0565c	Rv0593	Rv0780	Rv0946c
Rv0654	Rv0555	Rv0702	Rv0594	Rv0566c	Rv0594	Rv0781	Rv0949
Rv0656c	Rv0556	Rv0704	Rv0596c	Rv0567	Rv0595c	Rv0782	Rv0950c
Rv0659c	Rv0557	Rv0705	Rv0597c	Rv0568	Rv0596c	Rv0783c	Rv0951
Rv0660c	Rv0558	Rv0706	Rv0598c	Rv0569	Rv0597c	Rv0784	Rv0952
Rv0661c	Rv0560c	Rv0707	Rv0600c	Rv0570	Rv0598c	Rv0785	Rv0955
Rv0662c	Rv0561c	Rv0710	Rv0602c	Rv0571c	Rv0600c	Rv0787.1	Rv0956
Rv0663	Rv0562	Rv0711	Rv0604	Rv0572c	Rv0602c	Rv0792c	Rv0957
Rv0665	Rv0563	Rv0714	Rv0605	Rv0573c	Rv0604	Rv0797	Rv0958
Rv0668	Rv0564c	Rv0715	Rv0606	Rv0574c	Rv0605	Rv0798c	Rv0959
Rv0669c	Rv0565c	Rv0718	Rv0607	Rv0575c	Rv0606	Rv0799c	Rv0964c
Rv0670	Rv0566c	Rv0719	Rv0608	Rv0576	Rv0607	Rv0800	Rv0968
Rv0671	Rv0567	Rv0720	Rv0609.1	Rv0577	Rv0608	Rv0803	Rv0971c
Rv0672	Rv0568	Rv0723	Rv0610c	Rv0578c	Rv0609	Rv0804	Rv0972c
Rv0673	Rv0570	Rv0724	Rv0612	Rv0579	Rv0609.1	Rv0807	Rv0973c
Rv0674	Rv0571c	Rv0725c	Rv0613c	Rv0580c	Rv0610c	Rv0808	Rv0975c
Rv0675	Rv0572c	Rv0726c	Rv0614	Rv0581	Rv0611c	Rv0809	Rv0982
Rv0677c	Rv0573c	Rv0727c	Rv0616c	Rv0582	Rv0612	Rv0811c	Rv0983
Rv0678	Rv0574c	Rv0729	Rv0617	Rv0583c	Rv0613c	Rv0812	Rv0984
Rv0679c	Rv0575c	Rv0731c	Rv0618	Rv0584	Rv0614	Rv0813c	Rv0987
Rv0680c	Rv0576	Rv0732	Rv0619	Rv0585c	Rv0617	Rv0814c	Rv0992c
Rv0681	Rv0578c	Rv0733	Rv0620	Rv0586	Rv0620	Rv0815c	Rv0993
Rv0682	Rv0579	Rv0734	Rv0621	Rv0587	Rv0621	Rv0816c	Rv0996
Rv0683	Rv0580c	Rv0735	Rv0623	Rv0588	Rv0622	Rv0817c	Rv0998
Rv0684	Rv0581	Rv0737	Rv0624	Rv0589	Rv0623	Rv0818	Rv0999
Rv0685	Rv0582	Rv0739	Rv0625c	Rv0590	Rv0624	Rv0819	Rv1000c
Rv0686	Rv0584	Rv0740	Rv0626	Rv0591	Rv0625c	Rv0820	Rv1003
Rv0687	Rv0585c	Rv0741	Rv0627	Rv0592	Rv0626	Rv0821c	Rv1005c
Rv0688	Rv0586	Rv0743c	Rv0628c	Rv0593	Rv0627	Rv0822c	Rv1006
Rv0689c	Rv0587	Rv0748	Rv0629c	Rv0594	Rv0628c	Rv0823c	Rv1007c
Rv0690c	Rv0588	Rv0750	Rv0630c	Rv0596c	Rv0629c	Rv0824c	Rv1008
Rv0693	Rv0589	Rv0751c	Rv0631c	Rv0597c	Rv0630c	Rv0825c	Rv1009
Rv0694	Rv0590	Rv0752c	Rv0632c	Rv0598c	Rv0631c	Rv0826	Rv1010
Rv0695	Rv0590.1	Rv0753c	Rv0633c	Rv0599c	Rv0632c	Rv0827c	Rv1011
Rv0697	Rv0591	Rv0755.1	Rv0634A	Rv0600c	Rv0634A	Rv0830	Rv1013
Rv0698	Rv0592	Rv0756c	Rv0634B	Rv0602c	Rv0634B	Rv0835	Rv1015c
Rv0700	Rv0593	Rv0757	Rv0634c	Rv0604	Rv0634c	Rv0838	Rv1016c
Rv0701	Rv0594	Rv0758	Rv0635	Rv0605	Rv0635	Rv0839	Rv1017c
Rv0702	Rv0596c	Rv0760c	Rv0636	Rv0606	Rv0636	Rv0843	Rv1018c
Rv0703	Rv0597c	Rv0761c	Rv0637	Rv0607	Rv0637	Rv0844c	Rv1020
Rv0704	Rv0598c	Rv0762c	Rv0639	Rv0608	Rv0638	Rv0845	Rv1021
Rv0705	Rv0599c	Rv0764c	Rv0640	Rv0609	Rv0639	Rv0846c	Rv1022
Rv0706	Rv0600c	Rv0765c	Rv0641	Rv0609.1	Rv0640	Rv0851c	Rv1024
Rv0707	Rv0601c	Rv0767c	Rv0642c	Rv0610c	Rv0641	Rv0852	Rv1025
Rv0708	Rv0602c	Rv0768	Rv0643c	Rv0612	Rv0642c	Rv0853c	Rv1026
Rv0710	Rv0604	Rv0769	Rv0644c	Rv0613c	Rv0643c	Rv0854	Rv1027c
Rv0711	Rv0605	Rv0770	Rv0645c	Rv0614	Rv0644c	Rv0855	Rv1030
Rv0712	Rv0606	Rv0771	Rv0646c	Rv0617	Rv0645c	Rv0856	Rv1033c
Rv0714	Rv0608	Rv0772	Rv0647c	Rv0618	Rv0646c	Rv0858c	Rv1035c
Rv0715	Rv0609	Rv0773c	Rv0648	Rv0619	Rv0648	Rv0859	Rv1043c
Rv0716	Rv0609.1	Rv0774c	Rv0649	Rv0620	Rv0649	Rv0860	Rv1044
Rv0718	Rv0610c	Rv0775	Rv0651	Rv0621	Rv0650	Rv0861c	Rv1045
Rv0719	Rv0611c	Rv0777	Rv0652	Rv0622	Rv0651	Rv0862c	Rv1046c
Rv0720	Rv0612	Rv0778	Rv0653c	Rv0624	Rv0652	Rv0864	Rv1048c
Rv0723	Rv0613c	Rv0779c	Rv0654	Rv0625c	Rv0653c	Rv0865	Rv1049
Rv0724	Rv0614	Rv0780	Rv0655	Rv0626	Rv0654	Rv0868c	Rv1050
Rv0725c	Rv0616c	Rv0784	Rv0657c	Rv0628c	Rv0655	Rv0871	Rv1051c
Rv0726c	Rv0619	Rv0785	Rv0659c	Rv0629c	Rv0656c	Rv0873	Rv1058
Rv0727c	Rv0620	Rv0787	Rv0661c	Rv0630c	Rv0657c	Rv0875c	Rv1059
Rv0728c	Rv0621	Rv0788	Rv0662c	Rv0631c	Rv0658c	Rv0876c	Rv1063c
Rv0729	Rv0622	Rv0789c	Rv0663	Rv0633c	Rv0659c	Rv0877	Rv1066
Rv0730	Rv0623	Rv0791c	Rv0665	Rv0634c	Rv0661c	Rv0879c	Rv1068c
Rv0731c	Rv0624	Rv0792c	Rv0667	Rv0635	Rv0662c	Rv0880	Rv1069c
Rv0732	Rv0625c	Rv0795	Rv0668	Rv0636	Rv0663	Rv0881	Rv1070c
Rv0733	Rv0626	Rv0799c	Rv0669c	Rv0637	Rv0667	Rv0883c	Rv1072
Rv0734	Rv0627	Rv0800	Rv0670	Rv0638	Rv0668	Rv0884c	Rv1073
Rv0735	Rv0628c	Rv0802c	Rv0671	Rv0640	Rv0669c	Rv0885	Rv1074c
Rv0737	Rv0629c	Rv0803	Rv0672	Rv0641	Rv0671	Rv0886	Rv1076
Rv0738	Rv0630c	Rv0804	Rv0673	Rv0642c	Rv0672	Rv0887c	Rv1077
Rv0741	Rv0631c	Rv0805	Rv0675	Rv0643c	Rv0673	Rv0889c	Rv1078
Rv0743c	Rv0632c	Rv0806c	Rv0676c	Rv0644c	Rv0674	Rv0897c	Rv1079
Rv0744c	Rv0633c	Rv0808	Rv0677c	Rv0645c	Rv0675	Rv0898c	Rv1080c
Rv0748	Rv0634A	Rv0809	Rv0678	Rv0646c	Rv0676c	Rv0902c	Rv1082
Rv0749	Rv0634B	Rv0811c	Rv0681	Rv0648	Rv0677c	Rv0903c	Rv1084
Rv0751c	Rv0634c	Rv0812	Rv0682	Rv0649	Rv0678	Rv0905	Rv1085c
Rv0752c	Rv0635	Rv0813c	Rv0683	Rv0650	Rv0680c	Rv0906	Rv1088
Rv0753c	Rv0636	Rv0815c	Rv0684	Rv0651	Rv0681	Rv0907	Rv1092c
Rv0755c	Rv0637	Rv0817c	Rv0686	Rv0652	Rv0682	Rv0908	Rv1093
Rv0756c	Rv0639	Rv0819	Rv0688	Rv0653c	Rv0683	Rv0909	Rv1094
Rv0757	Rv0640	Rv0820	Rv0689c	Rv0654	Rv0684	Rv0910	Rv1095
Rv0758	Rv0641	Rv0821c	Rv0690c	Rv0655	Rv0685	Rv0912	Rv1096
Rv0759c	Rv0642c	Rv0822c	Rv0691c	Rv0656c	Rv0686	Rv0914c	Rv1098c
Rv0760c	Rv0643c	Rv0823c	Rv0692	Rv0657c	Rv0687	Rv0916c	Rv1101c
Rv0761c	Rv0644c	Rv0824c	Rv0693	Rv0659c	Rv0688	Rv0920c	Rv1106c
Rv0762c	Rv0645c	Rv0825c	Rv0694	Rv0660c	Rv0689c	Rv0923c	Rv1108c
Rv0764c	Rv0646c	Rv0826	Rv0695	Rv0661c	Rv0690c	Rv0924c	Rv1110
Rv0765c	Rv0647c	Rv0827c	Rv0696	Rv0662c	Rv0691c	Rv0926c	Rv1111c
Rv0766c	Rv0648	Rv0831c	Rv0697	Rv0663	Rv0693	Rv0928	Rv1112
Rv0767c	Rv0649	Rv0837c	Rv0699	Rv0665	Rv0694	Rv0929	Rv1117
Rv0768	Rv0650	Rv0838	Rv0701	Rv0666	Rv0695	Rv0931c	Rv1118c
Rv0769	Rv0651	Rv0839	Rv0702	Rv0667	Rv0696	Rv0932c	Rv1120c
Rv0770	Rv0652	Rv0840c	Rv0703	Rv0668	Rv0697	Rv0937c	Rv1121
Rv0772	Rv0653c	Rv0841	Rv0704	Rv0669c	Rv0698	Rv0938	Rv1122
Rv0773c	Rv0654	Rv0842	Rv0705	Rv0671	Rv0699	Rv0939	Rv1124
Rv0774c	Rv0655	Rv0843	Rv0706	Rv0672	Rv0700	Rv0941c	Rv1125
Rv0775	Rv0656c	Rv0845	Rv0707	Rv0673	Rv0701	Rv0944	Rv1126c
Rv0776c	Rv0658c	Rv0847	Rv0708	Rv0674	Rv0702	Rv0945	Rv1128c
Rv0777	Rv0659c	Rv0849	Rv0709	Rv0675	Rv0703	Rv0946c	Rv1129c
Rv0778	Rv0661c	Rv0852	Rv0710	Rv0676c	Rv0704	Rv0948c	Rv1130
Rv0779c	Rv0662c	Rv0853c	Rv0711	Rv0677c	Rv0705	Rv0949	Rv1131
Rv0780	Rv0663	Rv0854	Rv0712	Rv0678	Rv0706	Rv0950c	Rv1132
Rv0782	Rv0664	Rv0855	Rv0713	Rv0679c	Rv0707	Rv0951	Rv1138c
Rv0783c	Rv0665	Rv0856	Rv0714	Rv0681	Rv0708	Rv0952	Rv1143
Rv0784	Rv0667	Rv0857	Rv0715	Rv0682	Rv0709	Rv0953c	Rv1144
Rv0785	Rv0668	Rv0858c	Rv0716	Rv0683	Rv0710	Rv0957	Rv1147
Rv0787	Rv0669c	Rv0860	Rv0718	Rv0684	Rv0711	Rv0959	Rv1152
Rv0788	Rv0670	Rv0861c	Rv0719	Rv0685	Rv0712	Rv0966c	Rv1153c
Rv0789c	Rv0671	Rv0862c	Rv0720	Rv0686	Rv0713	Rv0971c	Rv1154c
Rv0790c	Rv0672	Rv0864	Rv0721	Rv0687	Rv0714	Rv0972c	Rv1155
Rv0792c	Rv0673	Rv0866	Rv0722	Rv0688	Rv0715	Rv0973c	Rv1156
Rv0793	Rv0674	Rv0867c	Rv0723	Rv0689c	Rv0716	Rv0974c	Rv1159
Rv0794c	Rv0675	Rv0869c	Rv0724	Rv0690c	Rv0717	Rv0975c	Rv1160
Rv0798c	Rv0676c	Rv0873	Rv0725c	Rv0691c	Rv0718	Rv0976c	Rv1162
Rv0799c	Rv0677c	Rv0874c	Rv0726c	Rv0692	Rv0719	Rv0981	Rv1165
Rv0800	Rv0678	Rv0876c	Rv0727c	Rv0693	Rv0720	Rv0982	Rv1168c
Rv0801	Rv0681	Rv0877	Rv0728c	Rv0694	Rv0721	Rv0983	Rv1173
Rv0802c	Rv0682	Rv0878c	Rv0729	Rv0696	Rv0723	Rv0984	Rv1175c
Rv0803	Rv0683	Rv0880	Rv0730	Rv0697	Rv0724	Rv0985c	Rv1178
Rv0804	Rv0684	Rv0884c	Rv0731c	Rv0701	Rv0725c	Rv0987	Rv1179c
Rv0805	Rv0685	Rv0885	Rv0732	Rv0702	Rv0726c	Rv0990c	Rv2940c
Rv0806c	Rv0686	Rv0886	Rv0733	Rv0703	Rv0727c	Rv0991c	Rv1182
Rv0807	Rv0687	Rv0887c	Rv0734	Rv0704	Rv0728c	Rv0992c	Rv1184c
Rv0808	Rv0688	Rv0888	Rv0735	Rv0705	Rv0729	Rv0993	Rv1185c
Rv0809	Rv0689c	Rv0889c	Rv0737	Rv0706	Rv0730	Rv0994	Rv1186c
Rv0811c	Rv0690c	Rv0890c	Rv0738	Rv0707	Rv0731c	Rv0995	Rv1187
Rv0812	Rv0691c	Rv0892	Rv0739	Rv0709	Rv0732	Rv0996	Rv1188
Rv0813c	Rv0692	Rv0893c	Rv0740	Rv0710	Rv0733	Rv0998	Rv1189
Rv0815c	Rv0693	Rv0894	Rv0741	Rv0711	Rv0734	Rv0999	Rv1190
Rv0816c	Rv0694	Rv0895	Rv0743c	Rv0712	Rv0735	Rv1000c	Rv1191
Rv0817c	Rv0695	Rv0896	Rv0744c	Rv0713	Rv0737	Rv1001	Rv1192
Rv0818	Rv0696	Rv0897c	Rv0748	Rv0714	Rv0738	Rv1002c	Rv1193
Rv0820	Rv0697	Rv0902c	Rv0750	Rv0715	Rv0739	Rv1003	Rv1194c
Rv0822c	Rv0698	Rv0903c	Rv0751c	Rv0716	Rv0740	Rv1005c	Rv1201c
Rv0823c	Rv0699	Rv0904c	Rv0752c	Rv0717	Rv0741	Rv1006	Rv1202
Rv0824c	Rv0700	Rv0905	Rv0753c	Rv0718	Rv0743c	Rv1007c	Rv1203c
Rv0825c	Rv0701	Rv0906	Rv0754	Rv0719	Rv0744c	Rv1008	Rv1204c
Rv0826	Rv0702	Rv0907	Rv0755.1	Rv0720	Rv0745	Rv1009	Rv1206
Rv0827c	Rv0703	Rv0908	Rv0758	Rv0721	Rv0748	Rv1010	Rv1207
Rv0828c	Rv0704	Rv0910	Rv0759c	Rv0722	Rv0749	Rv1011	Rv1208
Rv0830	Rv0705	Rv0912	Rv0762c	Rv0723	Rv0751c	Rv1013	Rv1209
Rv0831c	Rv0706	Rv0913c	Rv0763c	Rv0724	Rv0752c	Rv1014c	Rv1213
Rv0795	Rv0707	Rv0914c	Rv0764c	Rv0725c	Rv0753c	Rv1017c	Rv1215c
Rv2815c	Rv0709	Rv0915c	Rv0765c	Rv0726c	Rv0755.1	Rv1018c	Rv1216c
Rv3186	Rv0710	Rv0918	Rv0766c	Rv0727c	Rv0756c	Rv1019	Rv1217c
Rv2168c	Rv0711	Rv0919	Rv0767c	Rv0728c	Rv0757	Rv1021	Rv1219c
Rv2105	Rv0712	Rv0920c	Rv0768	Rv0729	Rv0758	Rv1022	Rv1223
Rv2354	Rv0713	Rv0921	Rv0769	Rv0730	Rv0759c	Rv1023	Rv1224
Rv3325	Rv0714	Rv0922	Rv0770	Rv0731c	Rv0762c	Rv1024	Rv1226c
Rv3474	Rv0715	Rv0923c	Rv0771	Rv0732	Rv0764c	Rv1025	Rv1229c
Rv1370c	Rv0716	Rv0924c	Rv0772	Rv0733	Rv0765c	Rv1026	Rv1232c
Rv2648	Rv0717	Rv0925c	Rv0773c	Rv0734	Rv0766c	Rv1027c	Rv1234
Rv2278	Rv0718	Rv0927c	Rv0774c	Rv0735	Rv0767c	Rv1028c	Rv1235
Rv3184	Rv0719	Rv0928	Rv0775	Rv0736	Rv0768	Rv1029	Rv1236
Rv1763	Rv0720	Rv0929	Rv0776c	Rv0737	Rv0769	Rv1030	Rv1238
Rv2480c	Rv0721	Rv0930	Rv0777	Rv0738	Rv0770	Rv1031	Rv1239c
Rv1757c	Rv0722	Rv0931c	Rv0778	Rv0739	Rv0772	Rv1032c	Rv1241
Rv3381c	Rv0723	Rv0933	Rv0779c	Rv0744c	Rv0773c	Rv1033c	Rv1246c
Rv0836c	Rv0724	Rv0935	Rv0780	Rv0745	Rv0774c	Rv1040c	Rv1247c
Rv0837c	Rv0724.1	Rv0936	Rv0782	Rv0747	Rv0775	Rv1044	Rv1248c
Rv0838	Rv0725c	Rv0937c	Rv0783c	Rv0748	Rv0776c	Rv1045	Rv1251c
Rv0839	Rv0726c	Rv0938	Rv0784	Rv0749	Rv0777	Rv1051c	Rv1253
Rv0840c	Rv0727c	Rv0939	Rv0785	Rv0751c	Rv0778	Rv1056	Rv1257c
Rv0842	Rv0728c	Rv0940c	Rv0787	Rv0752c	Rv0779c	Rv1057	Rv1259
Rv0843	Rv0729	Rv0941c	Rv0788	Rv0753c	Rv0780	Rv1058	Rv1260
Rv0844c	Rv0730	Rv0944	Rv0789c	Rv0754	Rv0782	Rv1059	Rv1261c
Rv0845	Rv0731c	Rv0945	Rv0790c	Rv0755.1	Rv0783c	Rv1060	Rv1262c
Rv0846c	Rv0732	Rv0946c	Rv0791c	Rv0756c	Rv0784	Rv1061	Rv1264
Rv0847	Rv0733	Rv0949	Rv0792c	Rv0757	Rv0785	Rv1062	Rv1265
Rv0849	Rv0734	Rv0950c	Rv0793	Rv0758	Rv0787	Rv1063c	Rv1266c
Rv0851c	Rv0735	Rv0951	Rv0794c	Rv0759c	Rv0787.1	Rv1065	Rv1267c
Rv0852	Rv0737	Rv0952	Rv0795	Rv0760c	Rv0788	Rv1066	Rv1268c
Rv0853c	Rv0738	Rv0953c	Rv0796	Rv0762c	Rv0790c	Rv1069c	Rv1270c
Rv0854	Rv0739	Rv0954	Rv0797	Rv0763c	Rv0791c	Rv1070c	Rv1272c
Rv0855	Rv0740	Rv0955	Rv0798c	Rv0764c	Rv0792c	Rv1072	Rv1273c
Rv0856	Rv0741	Rv0956	Rv0799c	Rv0765c	Rv0793	Rv1073	Rv1275
Rv0857	Rv0743c	Rv0957	Rv0800	Rv0766c	Rv0794c	Rv1074c	Rv1277
Rv0858c	Rv0744c	Rv0958	Rv0802c	Rv0767c	Rv0796	Rv1076	Rv1279
Rv0860	Rv0745	Rv0959	Rv0803	Rv0768	Rv0798c	Rv1077	Rv1280c
Rv0861c	Rv0748	Rv0963c	Rv0804	Rv0769	Rv0800	Rv1078	Rv1281c
Rv0862c	Rv0749	Rv0964c	Rv0805	Rv0770	Rv0801	Rv1080c	Rv1282c
Rv0864	Rv0750	Rv0966c	Rv0806c	Rv0771	Rv0802c	Rv1082	Rv1284
Rv0865	Rv0751c	Rv0968	Rv0807	Rv0772	Rv0803	Rv1084	Rv1285
Rv0866	Rv0752c	Rv0969	Rv0808	Rv0773c	Rv0804	Rv1086	Rv1287
Rv0867c	Rv0753c	Rv0971c	Rv0809	Rv0774c	Rv0805	Rv1092c	Rv1290c
Rv0868c	Rv0755.1	Rv0972c	Rv0811c	Rv0775	Rv0806c	Rv1093	Rv1290.1
Rv0869c	Rv0756c	Rv0973c	Rv0812	Rv0776c	Rv0807	Rv1094	Rv1293
Rv0873	Rv0757	Rv0975c	Rv0813c	Rv0777	Rv0808	Rv1095	Rv1294
Rv0874c	Rv0758	Rv0976c	Rv0814c	Rv0778	Rv0811c	Rv1096	Rv1297
Rv0876c	Rv0759c	Rv0979A	Rv0815c	Rv0780	Rv0812	Rv1097c	Rv1298
Rv0879c	Rv0760c	Rv0982	Rv0816c	Rv0781	Rv0813c	Rv1098c	Rv1302
Rv0880	Rv0761c	Rv0983	Rv0817c	Rv0783c	Rv0815c	Rv1099c	Rv1307
Rv0883c	Rv0762c	Rv0984	Rv0818	Rv0784	Rv0817c	Rv1100	Rv1308
Rv0884c	Rv0764c	Rv0985c	Rv0819	Rv0785	Rv0818	Rv1104	Rv1309
Rv0885	Rv0765c	Rv0986	Rv0820	Rv0786c	Rv0819	Rv1105	Rv1310
Rv0886	Rv0766c	Rv0987	Rv0822c	Rv0787	Rv0820	Rv1106c	Rv1312
Rv0887c	Rv0767c	Rv0990c	Rv0823c	Rv0787.1	Rv0821c	Rv1107c	Rv1314c
Rv0889c	Rv0768	Rv0992c	Rv0824c	Rv0788	Rv0822c	Rv1108c	Rv1315
Rv0890c	Rv0769	Rv0993	Rv0826	Rv0789c	Rv0823c	Rv1109c	Rv1316c
Rv0891c	Rv0770	Rv0995	Rv0827c	Rv0790c	Rv0824c	Rv1110	Rv1317c
Rv0893c	Rv0771	Rv0996	Rv0829	Rv0791c	Rv0825c	Rv1111c	Rv1320c
Rv0894	Rv0772	Rv0998	Rv0830	Rv0792c	Rv0826	Rv1112	Rv1322
Rv0895	Rv0773c	Rv0999	Rv0831c	Rv0793	Rv0827c	Rv1113	Rv1323
Rv0896	Rv0774c	Rv1000c	Rv0832	Rv0794c	Rv0828c	Rv1117	Rv1326c
Rv0897c	Rv0775	Rv1001	Rv0833	Rv0796	Rv0829	Rv1118c	Rv1327c
Rv0898c	Rv0776c	Rv1002c	Rv0837c	Rv0798c	Rv0830	Rv1120c	Rv1328
Rv0899	Rv0777	Rv1003	Rv0838	Rv0799c	Rv0831c	Rv1121	Rv1329c
Rv0901	Rv0778	Rv1005c	Rv0840c	Rv0800	Rv0836c	Rv1122	Rv1332
Rv0902c	Rv0779c	Rv1006	Rv0841	Rv0801	Rv0837c	Rv1123c	Rv1333
Rv0903c	Rv0780	Rv1007c	Rv0842	Rv0802c	Rv0838	Rv1124	Rv1345
Rv0904c	Rv0781	Rv1008	Rv0843	Rv0803	Rv0839	Rv1125	Rv1346
Rv0905	Rv0782	Rv1009	Rv0844c	Rv0805	Rv0840c	Rv1126c	Rv1348
Rv0906	Rv0783c	Rv1010	Rv0845	Rv0806c	Rv0842	Rv1127c	Rv1349
Rv0907	Rv0784	Rv1011	Rv0846c	Rv0807	Rv0843	Rv1128c	Rv1350
Rv0908	Rv0785	Rv1012	Rv0848	Rv0808	Rv0844c	Rv1129c	Rv1351
Rv0910	Rv0786c	Rv1013	Rv0852	Rv0809	Rv0845	Rv1130	Rv1353c
Rv0911	Rv0787	Rv1015c	Rv0853c	Rv0811c	Rv0846c	Rv1131	Rv1355c
Rv0913c	Rv0787.1	Rv1016c	Rv0855	Rv0812	Rv0847	Rv1132	Rv1357c
Rv0914c	Rv0788	Rv1017c	Rv0856	Rv0813c	Rv0848	Rv1133c	Rv1359
Rv0915c	Rv0789c	Rv1018c	Rv0858c	Rv0815c	Rv0849	Rv1138c	Rv1360
Rv0918	Rv0790c	Rv1019	Rv0860	Rv0816c	Rv0850	Rv1139c	Rv1363c
Rv0919	Rv0791c	Rv1020	Rv0861c	Rv0817c	Rv0851c	Rv1140	Rv1368
Rv0920c	Rv0792c	Rv1021	Rv0862c	Rv0818	Rv0853c	Rv1141c	Rv1371
Rv0921	Rv0793	Rv1022	Rv0863	Rv0819	Rv0855	Rv1142c	Rv1372
Rv0922	Rv0794c	Rv1023	Rv0864	Rv0820	Rv0856	Rv1143	Rv1373
Rv0923c	Rv0795	Rv1024	Rv0866	Rv0821c	Rv0857	Rv1144	Rv1374c
Rv0925c	Rv0796	Rv1025	Rv0868c	Rv0822c	Rv0858c	Rv1145	Rv1375
Rv0926c	Rv0797	Rv1026	Rv0869c	Rv0823c	Rv0859	Rv1146	Rv1376
Rv0927c	Rv0798c	Rv1027c	Rv0873	Rv0824c	Rv0860	Rv1147	Rv1379
Rv0928	Rv0799c	Rv1028c	Rv0874c	Rv0825c	Rv0861c	Rv1151c	Rv1381
Rv0929	Rv0800	Rv1030	Rv0876c	Rv0826	Rv0862c	Rv1152	Rv1382
Rv0930	Rv0801	Rv1032c	Rv0877	Rv0827c	Rv0863	Rv1154c	Rv1383
Rv0931c	Rv0802c	Rv1033c	Rv0878c	Rv0828c	Rv0864	Rv1155	Rv1384
Rv0932c	Rv0803	Rv1034c	Rv0879c	Rv0829	Rv0865	Rv1156	Rv1388
Rv0933	Rv0804	Rv1035c	Rv0880	Rv0830	Rv0866	Rv1157c	Rv1392
Rv0934	Rv0805	Rv1036c	Rv0881	Rv0831c	Rv0867c	Rv1159	Rv1394c
Rv0935	Rv0806c	Rv1038c	Rv0883c	Rv0836c	Rv0869c	Rv1160	Rv1395
Rv0936	Rv0807	Rv1041c	Rv0884c	Rv0837c	Rv0871	Rv1161	Rv1399c
Rv0937c	Rv0808	Rv1043c	Rv0885	Rv0838	Rv0873	Rv1162	Rv1402
Rv0939	Rv0809	Rv1044	Rv0886	Rv0840c	Rv0874c	Rv1163	Rv1404
Rv0940c	Rv0811c	Rv1045	Rv0887c	Rv0841	Rv0876c	Rv1164	Rv1406
Rv0941c	Rv0812	Rv1046c	Rv0888	Rv0842	Rv0877	Rv1165	Rv1407
Rv0943c	Rv0813c	Rv1048c	Rv0889c	Rv0843	Rv0878c	Rv1166	Rv1409
Rv0944	Rv0814c	Rv1049	Rv0890c	Rv0844c	Rv0879c	Rv1167c	Rv1411c
Rv0945	Rv0815c	Rv1050	Rv0891c	Rv0845	Rv0880	Rv1170	Rv1412
Rv0946c	Rv0816c	Rv1051c	Rv0892	Rv0846c	Rv0883c	Rv1171	Rv1413
Rv0948c	Rv0817c	Rv1057	Rv0893c	Rv0847	Rv0884c	Rv1173	Rv1414
Rv0949	Rv0818	Rv1058	Rv0894	Rv0848	Rv0885	Rv1174c	Rv1415
Rv0950c	Rv0819	Rv1059	Rv0895	Rv0849	Rv0886	Rv1176c	Rv1418
Rv0951	Rv0820	Rv1060	Rv0896	Rv0850	Rv0887c	Rv1177	Rv1420
Rv0952	Rv0821c	Rv1063c	Rv0897c	Rv0851c	Rv0888	Rv1180	Rv1421
Rv0955	Rv0822c	Rv1066	Rv0898c	Rv0852	Rv0889c	Rv1181	Rv1422
Rv0956	Rv0823c	Rv1068c	Rv0899	Rv0853c	Rv0890c	Rv1183	Rv1423
Rv0957	Rv0824c	Rv1069c	Rv0900	Rv0854	Rv0891c	Rv1184c	Rv1425
Rv0958	Rv0825c	Rv1070c	Rv0901	Rv0855	Rv0892	Rv1185c	Rv1426c
Rv0959	Rv0826	Rv1071c	Rv0902c	Rv0857	Rv0893c	Rv1186c	Rv1427c
Rv0960	Rv0827c	Rv1072	Rv0903c	Rv0858c	Rv0894	Rv1187	Rv1429
Rv0962c	Rv0828c	Rv1073	Rv0904c	Rv0859	Rv0895	Rv1188	Rv1431
Rv0964c	Rv0829	Rv1074c	Rv0905	Rv0860	Rv0896	Rv1189	Rv1432
Rv0968	Rv0830	Rv1075c	Rv0907	Rv0861c	Rv0897c	Rv1191	Rv1433
Rv0970	Rv0831c	Rv1076	Rv0908	Rv0862c	Rv0898c	Rv1193	Rv1436
Rv0971c	Rv0837c	Rv1077	Rv0910	Rv0863	Rv0899	Rv1200	Rv1437
Rv0972c	Rv0838	Rv1078	Rv0911	Rv0866	Rv0900	Rv1201c	Rv1438
Rv0973c	Rv0839	Rv1079	Rv0913c	Rv0867c	Rv0901	Rv1202	Rv1439c
Rv0974c	Rv0840c	Rv1080c	Rv0914c	Rv0868c	Rv0902c	Rv1203c	Rv1442
Rv0975c	Rv0842	Rv1082	Rv0915c	Rv0869c	Rv0903c	Rv1204c	Rv1443c
Rv0981	Rv0843	Rv1084	Rv0917	Rv0871	Rv0904c	Rv1205	Rv1444c
Rv0982	Rv0844c	Rv1085c	Rv0918	Rv0873	Rv0905	Rv1206	Rv1447c
Rv0983	Rv0845	Rv1086	Rv0919	Rv0874c	Rv0906	Rv1207	Rv1448c
Rv0984	Rv0846c	Rv1088	Rv0920c	Rv0875c	Rv0907	Rv1208	Rv1449c
Rv0985c	Rv0847	Rv1092c	Rv0921	Rv0876c	Rv0908	Rv1209	Rv1453
Rv0987	Rv0848	Rv1093	Rv0922	Rv0878c	Rv0910	Rv1210	Rv1454c
Rv0988	Rv0849	Rv1094	Rv0923c	Rv0880	Rv0911	Rv1212c	Rv1455
Rv0989c	Rv0850	Rv1095	Rv0924c	Rv0881	Rv0913c	Rv1213	Rv1456c
Rv0991c	Rv0851c	Rv1096	Rv0925c	Rv0883c	Rv0914c	Rv1215c	Rv1458c
Rv0992c	Rv0852	Rv1098c	Rv0926c	Rv0884c	Rv0915c	Rv1216c	Rv1460
Rv0993	Rv0853c	Rv1099c	Rv0928	Rv0885	Rv0917	Rv1217c	Rv1461
Rv0994	Rv0854	Rv1101c	Rv0929	Rv0886	Rv0918	Rv1218c	Rv1462
Rv0996	Rv0855	Rv1106c	Rv0930	Rv0887c	Rv0919	Rv1219c	Rv1464
Rv0997	Rv0856	Rv1108c	Rv0931c	Rv0888	Rv0920c	Rv1220c	Rv1467c
Rv0998	Rv0857	Rv1109c	Rv0933	Rv0889c	Rv0921	Rv1221	Rv1469
Rv0999	Rv0858c	Rv1110	Rv0935	Rv0890c	Rv0922	Rv1223	Rv1472
Rv1000c	Rv0859	Rv1111c	Rv0936	Rv0891c	Rv0923c	Rv1224	Rv1473
Rv1003	Rv0860	Rv1112	Rv0938	Rv0892	Rv0924c	Rv1229c	Rv1474c
Rv1004c	Rv0861c	Rv1113	Rv0939	Rv0893c	Rv0926c	Rv1230c	Rv1475c
Rv1005c	Rv0862c	Rv1114	Rv0940c	Rv0894	Rv0927c	Rv1232c	Rv1477
Rv1006	Rv0863	Rv1115	Rv0941c	Rv0895	Rv0928	Rv1234	Rv1479
Rv1007c	Rv0864	Rv1117	Rv0942	Rv0896	Rv0929	Rv1235	Rv1480
Rv1008	Rv0868c	Rv1118c	Rv0943c	Rv0897c	Rv0930	Rv1236	Rv1481
Rv1009	Rv0869c	Rv1120c	Rv0944	Rv0898c	Rv0931c	Rv1237	Rv1482c
Rv1010	Rv0871	Rv1121	Rv0945	Rv0899	Rv0933	Rv1238	Rv1483
Rv1011	Rv0872c	Rv1122	Rv0946c	Rv0900	Rv0934	Rv1239c	Rv1485
Rv1013	Rv0873	Rv1124	Rv0949	Rv0901	Rv0935	Rv1240	Rv1488
Rv1014c	Rv0874c	Rv1125	Rv0950c	Rv0902c	Rv0936	Rv1244	Rv1490
Rv1015c	Rv0875c	Rv1126c	Rv0951	Rv0903c	Rv0937c	Rv1245c	Rv1491c
Rv1016c	Rv0876c	Rv1128c	Rv0952	Rv0904c	Rv0938	Rv1249c	Rv1493
Rv1017c	Rv0877	Rv1129c	Rv0953c	Rv0905	Rv0939	Rv1250	Rv1495
Rv1018c	Rv0878c	Rv1130	Rv0954	Rv0906	Rv0940c	Rv1251c	Rv1496
Rv1019	Rv0879c	Rv1131	Rv0955	Rv0907	Rv0941c	Rv1253	Rv1497
Rv1020	Rv0880	Rv1132	Rv0956	Rv0908	Rv0942	Rv1254	Rv1498c
Rv1021	Rv0881	Rv1133c	Rv0957	Rv0909	Rv0944	Rv1255c	Rv1499
Rv1022	Rv0883c	Rv1135.1	Rv0958	Rv0910	Rv0945	Rv1256c	Rv1500
Rv1024	Rv0884c	Rv1135c	Rv0959	Rv0911	Rv0946c	Rv1257c	Rv1504c
Rv1025	Rv0885	Rv1138c	Rv0960	Rv0913c	Rv0948c	Rv1258c	Rv1507.1
Rv1026	Rv0886	Rv1139c	Rv0961	Rv0914c	Rv0949	Rv1259	Rv1508c
Rv1027c	Rv0887c	Rv1140	Rv0962c	Rv0915c	Rv0950c	Rv1260	Rv1509
Rv1029	Rv0888	Rv1143	Rv0963c	Rv0917	Rv0951	Rv1261c	Rv1511
Rv1030	Rv0889c	Rv1144	Rv0964c	Rv0918	Rv0952	Rv1262c	Rv1512
Rv1031	Rv0890c	Rv1145	Rv0967	Rv0919	Rv0953c	Rv1263	Rv1513
Rv1033c	Rv0891c	Rv1146	Rv0968	Rv0920c	Rv0954	Rv1264	Rv1514c
Rv1035c	Rv0892	Rv1147	Rv0969	Rv0921	Rv0955	Rv1265	Rv1515c
Rv1038c	Rv0893c	Rv1148c	Rv0970	Rv0922	Rv0956	Rv1266c	Rv1516c
Rv1039c	Rv0894	Rv1152	Rv0971c	Rv0924c	Rv0957	Rv1267c	Rv1521
Rv1040c	Rv0895	Rv1153c	Rv0972c	Rv0926c	Rv0958	Rv1272c	Rv1522c
Rv1043c	Rv0896	Rv1154c	Rv0973c	Rv0927c	Rv0959	Rv1273c	Rv1523
Rv1044	Rv0897c	Rv1155	Rv0974c	Rv0928	Rv0960	Rv1275	Rv1524
Rv1045	Rv0898c	Rv1156	Rv0975c	Rv0929	Rv0963c	Rv1276c	Rv1525
Rv1046c	Rv0899	Rv1159	Rv0979A	Rv0931c	Rv0964c	Rv1277	Rv1529
Rv1048c	Rv0900	Rv1160	Rv0979c	Rv0932c	Rv0966c	Rv1278	Rv1530
Rv1049	Rv0902c	Rv1161	Rv0982	Rv0934	Rv0967	Rv1279	Rv1532c
Rv1050	Rv0903c	Rv1162	Rv0983	Rv0935	Rv0968	Rv1280c	Rv1534
Rv1051c	Rv0904c	Rv1164	Rv0984	Rv0936	Rv0969	Rv1281c	Rv1536
Rv1052	Rv0905	Rv1165	Rv0986	Rv0937c	Rv0970	Rv1282c	Rv1538c
Rv1054	Rv0907	Rv1168c	Rv0987	Rv0938	Rv0971c	Rv1283c	Rv1543
Rv1056	Rv0908	Rv1171	Rv0988	Rv0939	Rv0972c	Rv1284	Rv1544
Rv1058	Rv0910	Rv1173	Rv0989c	Rv0940c	Rv0973c	Rv1285	Rv1547
Rv1059	Rv0911	Rv1175c	Rv0990c	Rv0941c	Rv0974c	Rv1286	Rv1550
Rv1060	Rv0913c	Rv1178	Rv0992c	Rv0942	Rv0975c	Rv1287	Rv1551
Rv1061	Rv0914c	Rv1179c	Rv0993	Rv0943c	Rv0976c	Rv1293	Rv1552
Rv1062	Rv0915c	Rv1180	Rv0994	Rv0944	Rv0979c	Rv1294	Rv1556
Rv1063c	Rv0917	Rv1181	Rv0995	Rv0945	Rv0981	Rv1295	Rv1557
Rv1064c	Rv0919	Rv1182	Rv0996	Rv0946c	Rv0982	Rv1296	Rv1558
Rv1065	Rv0920c	Rv1183	Rv0997	Rv0949	Rv0983	Rv1297	Rv1559
Rv1066	Rv0921	Rv1184c	Rv0998	Rv0950c	Rv0984	Rv1298	Rv1562c
Rv1067c	Rv0922	Rv1185c	Rv0999	Rv0951	Rv0987	Rv1299	Rv1563c
Rv1068c	Rv0923c	Rv1186c	Rv1000c	Rv0952	Rv0988	Rv1300	Rv1564c
Rv1069c	Rv0924c	Rv1187	Rv1001	Rv0953c	Rv0989c	Rv1301	Rv1565c
Rv1070c	Rv0925c	Rv1188	Rv1002c	Rv0955	Rv0990c	Rv1302	Rv1570
Rv1071c	Rv0926c	Rv1189	Rv1003	Rv0957	Rv0991c	Rv1303	Rv1571
Rv1072	Rv0927c	Rv1190	Rv1005c	Rv0958	Rv0992c	Rv1304	Rv1592c
Rv1073	Rv0928	Rv1191	Rv1006	Rv0959	Rv0993	Rv1306	Rv1593c
Rv1074c	Rv0929	Rv1192	Rv1007c	Rv0963c	Rv0994	Rv1307	Rv1594
Rv1076	Rv0930	Rv1193	Rv1008	Rv0964c	Rv0995	Rv1308	Rv1595
Rv1077	Rv0931c	Rv1194c	Rv1009	Rv0966c	Rv0996	Rv1309	Rv1602
Rv1078	Rv0932c	Rv1201c	Rv1010	Rv0967	Rv0997	Rv1310	Rv1604
Rv1079	Rv0933	Rv1202	Rv1011	Rv0969	Rv0998	Rv1311	Rv1608c
Rv1080c	Rv0935	Rv1203c	Rv1012	Rv0970	Rv0999	Rv1312	Rv1609
Rv1081c	Rv0936	Rv1204c	Rv1013	Rv0971c	Rv1000c	Rv1314c	Rv1612
Rv1082	Rv0937c	Rv1206	Rv1014c	Rv0972c	Rv1001	Rv1315	Rv1613
Rv1083	Rv0938	Rv1207	Rv1015c	Rv0973c	Rv1002c	Rv1316c	Rv1617
Rv1084	Rv0939	Rv1208	Rv1016c	Rv0974c	Rv1003	Rv1317c	Rv1618
Rv1085c	Rv0940c	Rv1209	Rv1017c	Rv0975c	Rv1004c	Rv1318c	Rv1619
Rv1086	Rv0941c	Rv1211	Rv1018c	Rv0976c	Rv1006	Rv1319c	Rv1621c
Rv1087.1	Rv0942	Rv1212c	Rv1019	Rv0979A	Rv1007c	Rv1320c	Rv1625c
Rv1088	Rv0943c	Rv1213	Rv1020	Rv0979c	Rv1008	Rv1321	Rv1626
Rv1089	Rv0944	Rv1215c	Rv1021	Rv0980c	Rv1009	Rv1322	Rv1627c
Rv1092c	Rv0945	Rv1216c	Rv1022	Rv0981	Rv1010	Rv1323	Rv1629
Rv1093	Rv0946c	Rv1217c	Rv1023	Rv0982	Rv1011	Rv1324	Rv1630
Rv1094	Rv0948c	Rv1218c	Rv1024	Rv0983	Rv1012	Rv1327c	Rv1631
Rv1095	Rv0949	Rv1219c	Rv1025	Rv0984	Rv1013	Rv1328	Rv1635c
Rv1096	Rv0950c	Rv1222	Rv1026	Rv0985c	Rv1014c	Rv1329c	Rv1636
Rv1097c	Rv0951	Rv1223	Rv1027c	Rv0986	Rv1015c	Rv1330c	Rv1638.1
Rv1098c	Rv0952	Rv1224	Rv1028c	Rv0987	Rv1017c	Rv1331	Rv1641
Rv1101c	Rv0953c	Rv1225c	Rv1029	Rv0988	Rv1018c	Rv1332	Rv1645c
Rv1102c	Rv0955	Rv1226c	Rv1030	Rv0989c	Rv1019	Rv1333	Rv1647
Rv1105	Rv0956	Rv1229c	Rv1032c	Rv0990c	Rv1020	Rv1337	Rv1653
Rv1106c	Rv0957	Rv1230c	Rv1033c	Rv0991c	Rv1021	Rv1338	Rv1655
Rv1108c	Rv0958	Rv1232c	Rv1034c	Rv0992c	Rv1022	Rv1341	Rv1658
Rv1110	Rv0959	Rv1234	Rv1035c	Rv0994	Rv1023	Rv1343c	Rv1659
Rv1111c	Rv0960	Rv1235	Rv1039c	Rv0995	Rv1024	Rv1344	Rv1660
Rv1112	Rv0961	Rv1236	Rv1041c	Rv0996	Rv1025	Rv1345	Rv1664
Rv1114	Rv0962c	Rv1237	Rv1042c	Rv0997	Rv1026	Rv1346	Rv1666c
Rv1115	Rv0963c	Rv1238	Rv1043c	Rv0998	Rv1027c	Rv1347c	Rv1668c
Rv1117	Rv0964c	Rv1239c	Rv1044	Rv0999	Rv1028c	Rv1348	Rv1673c
Rv1118c	Rv0966c	Rv1240	Rv1045	Rv1000c	Rv1029	Rv1349	Rv1675c
Rv1120c	Rv0967	Rv1241	Rv1046c	Rv1001	Rv1030	Rv1350	Rv1676
Rv1121	Rv0968	Rv1246c	Rv1047	Rv1002c	Rv1031	Rv1353c	Rv1679
Rv1122	Rv0969	Rv1247c	Rv1048c	Rv1003	Rv1032c	Rv1354c	Rv1680
Rv1123c	Rv0971c	Rv1248c	Rv1049	Rv1005c	Rv1033c	Rv1355c	Rv1681
Rv1124	Rv0972c	Rv1250	Rv1050	Rv1006	Rv1034c	Rv1356c	Rv1682
Rv1125	Rv0973c	Rv1251c	Rv1051c	Rv1007c	Rv1035c	Rv1360	Rv1683
Rv1126c	Rv0974c	Rv1253	Rv1053c	Rv1008	Rv1038c	Rv1362c	Rv1685c
Rv1127c	Rv0975c	Rv1257c	Rv1054	Rv1009	Rv1039c	Rv1363c	Rv1689
Rv1128c	Rv0976c	Rv1259	Rv1055	Rv1010	Rv1042c	Rv1364c	Rv1692
Rv1129c	Rv0978c	Rv1260	Rv1056	Rv1011	Rv1043c	Rv1367c	Rv1694
Rv1130	Rv0979A	Rv1261c	Rv1057	Rv1012	Rv1044	Rv1379	Rv1695
Rv1131	Rv0979c	Rv1262c	Rv1058	Rv1013	Rv1045	Rv1380	Rv1696
Rv1132	Rv0980c	Rv1264	Rv1059	Rv1014c	Rv1046c	Rv1381	Rv1697
Rv1135.1	Rv0981	Rv1265	Rv1060	Rv1015c	Rv1047	Rv1382	Rv1699
Rv1136	Rv0982	Rv1266c	Rv1061	Rv1016c	Rv1048c	Rv1383	Rv1700
Rv1138c	Rv0983	Rv1267c	Rv1062	Rv1017c	Rv1049	Rv1384	Rv1701
Rv1139c	Rv0984	Rv1268c	Rv1063c	Rv1018c	Rv1050	Rv1385	Rv1706c
Rv1141c	Rv0985c	Rv1270c	Rv1064c	Rv1019	Rv1051c	Rv1387	Rv1710
Rv1142c	Rv0986	Rv1272c	Rv1065	Rv1020	Rv1053c	Rv1388	Rv1711
Rv1143	Rv0987	Rv1273c	Rv1066	Rv1021	Rv1054	Rv1391	Rv1712
Rv1144	Rv0988	Rv1274	Rv1067c	Rv1022	Rv1056	Rv1392	Rv1713
Rv1147	Rv0990c	Rv1275	Rv1068c	Rv1023	Rv1057	Rv1393c	Rv1715
Rv1152	Rv0991c	Rv1277	Rv1069c	Rv1024	Rv1058	Rv1400c	Rv1718
Rv1153c	Rv0992c	Rv1278	Rv1070c	Rv1025	Rv1059	Rv1402	Rv1719
Rv1154c	Rv0993	Rv1279	Rv1072	Rv1026	Rv1063c	Rv1404	Rv1723
Rv1155	Rv0994	Rv1280c	Rv1073	Rv1027c	Rv1064c	Rv1405c	Rv1725c
Rv1156	Rv0995	Rv1281c	Rv1074c	Rv1028c	Rv1066	Rv1406	Rv1726
Rv1157c	Rv0996	Rv1282c	Rv1075c	Rv1029	Rv1068c	Rv1407	Rv1729c
Rv1159	Rv0997	Rv1284	Rv1076	Rv1030	Rv1069c	Rv1408	Rv1731
Rv1160	Rv0998	Rv1285	Rv1077	Rv1031	Rv1070c	Rv1409	Rv1733c
Rv1162	Rv0999	Rv1286	Rv1078	Rv1032c	Rv1071c	Rv1410c	Rv1736c
Rv1163	Rv1000c	Rv1287	Rv1079	Rv1033c	Rv1072	Rv1411c	Rv1739c
Rv1164	Rv1001	Rv1289	Rv1080c	Rv1034c	Rv1073	Rv1412	Rv1742
Rv1165	Rv1002c	Rv1290.1	Rv1081c	Rv1035c	Rv1074c	Rv1415	Rv1743
Rv1166	Rv1003	Rv1290c	Rv1082	Rv1036c	Rv1075c	Rv1416	Rv1745c
Rv1167c	Rv1005c	Rv1292	Rv1084	Rv1039c	Rv1076	Rv1420	Rv1747
Rv1168c	Rv1006	Rv1293	Rv1085c	Rv1040c	Rv1077	Rv1421	Rv1748
Rv1169c	Rv1007c	Rv1294	Rv1088	Rv1042c	Rv1078	Rv1422	Rv1750c
Rv1171	Rv1008	Rv1297	Rv1092c	Rv1043c	Rv1079	Rv1423	Rv1751
Rv1172c	Rv1009	Rv1298	Rv1093	Rv1044	Rv1080c	Rv1425	Rv1752
Rv1173	Rv1010	Rv1302	Rv1094	Rv1045	Rv1081c	Rv1426c	Rv1762c
Rv1175c	Rv1011	Rv1303	Rv1095	Rv1048c	Rv1082	Rv1427c	Rv1767
Rv1176c	Rv1012	Rv1304	Rv1096	Rv1049	Rv1084	Rv1428c	Rv1770
Rv1178	Rv1013	Rv1307	Rv1097c	Rv1050	Rv1085c	Rv1431	Rv1771
Rv1179c	Rv1014c	Rv1308	Rv1098c	Rv1051c	Rv1086	Rv1432	Rv1773c
Rv2940c	Rv1015c	Rv1309	Rv1099c	Rv1053c	Rv1087.1	Rv1436	Rv1775
Rv1182	Rv1016c	Rv1310	Rv1100	Rv1054	Rv1088	Rv1437	Rv1776c
Rv1184c	Rv1017c	Rv1312	Rv1101c	Rv1056	Rv1092c	Rv1438	Rv1778c
Rv1185c	Rv1018c	Rv1314c	Rv1105	Rv1057	Rv1093	Rv1445c	Rv1779c
Rv1186c	Rv1020	Rv1315	Rv1106c	Rv1058	Rv1094	Rv1446c	Rv1780
Rv1187	Rv1021	Rv1316c	Rv1107c	Rv1059	Rv1095	Rv1447c	Rv1781c
Rv1188	Rv1022	Rv1317c	Rv1108c	Rv1060	Rv1096	Rv1448c	Rv1782
Rv1189	Rv1023	Rv1318c	Rv1109c	Rv1061	Rv1098c	Rv1449c	Rv1784
Rv1190	Rv1024	Rv1319c	Rv1110	Rv1062	Rv1099c	Rv1454c	Rv1785c
Rv1191	Rv1025	Rv1320c	Rv1111c	Rv1063c	Rv1104	Rv1455	Rv1790
Rv1192	Rv1026	Rv1322	Rv1112	Rv1065	Rv1105	Rv1456c	Rv1797
Rv1193	Rv1027c	Rv1323	Rv1113	Rv1066	Rv1106c	Rv1457c	Rv1798
Rv1194c	Rv1028c	Rv1325c	Rv1116	Rv1067c	Rv1108c	Rv1458c	Rv1802
Rv1197	Rv1029	Rv1326c	Rv1116.1	Rv1068c	Rv1109c	Rv1459c	Rv1811
Rv1201c	Rv1030	Rv1327c	Rv1117	Rv1069c	Rv1110	Rv1460	Rv1812c
Rv1202	Rv1031	Rv1328	Rv1118c	Rv1070c	Rv1111c	Rv1461	Rv1816
Rv1203c	Rv1032c	Rv1329c	Rv1120c	Rv1071c	Rv1112	Rv1462	Rv1817
Rv1204c	Rv1033c	Rv1330c	Rv1121	Rv1072	Rv1113	Rv1463	Rv1819c
Rv1205	Rv1034c	Rv1332	Rv1122	Rv1073	Rv1116	Rv1464	Rv1820
Rv1206	Rv1035c	Rv1333	Rv1124	Rv1074c	Rv1117	Rv1465	Rv1821
Rv1207	Rv1038c	Rv1336	Rv1125	Rv1075c	Rv1118c	Rv1467c	Rv1825
Rv1208	Rv1039c	Rv1337	Rv1126c	Rv1076	Rv1120c	Rv1471	Rv1830
Rv1209	Rv1040c	Rv1338	Rv1127c	Rv1077	Rv1121	Rv1472	Rv1832
Rv1210	Rv1041c	Rv1344	Rv1128c	Rv1078	Rv1122	Rv1473	Rv1833c
Rv1213	Rv1042c	Rv1345	Rv1129c	Rv1079	Rv1123c	Rv1473.1	Rv1834
Rv1215c	Rv1043c	Rv1346	Rv1130	Rv1080c	Rv1124	Rv1474c	Rv1835c
Rv1216c	Rv1044	Rv1347c	Rv1131	Rv1081c	Rv1125	Rv1475c	Rv1841c
Rv1217c	Rv1045	Rv1348	Rv1132	Rv1083	Rv1126c	Rv1477	Rv1842c
Rv1218c	Rv1046c	Rv1349	Rv1133c	Rv1084	Rv1127c	Rv1478	Rv1844c
Rv1219c	Rv1047	Rv1350	Rv1134	Rv1085c	Rv1128c	Rv1479	Rv1846c
Rv1222	Rv1048c	Rv1351	Rv1135c	Rv1086	Rv1129c	Rv1480	Rv1848
Rv1223	Rv1049	Rv1352	Rv1137c	Rv1087	Rv1130	Rv1481	Rv1850
Rv1224	Rv1050	Rv1353c	Rv1138c	Rv1088	Rv1131	Rv1482c	Rv1851
Rv1225c	Rv1051c	Rv1355c	Rv1140	Rv1091	Rv1132	Rv1483	Rv1852
Rv1226c	Rv1052	Rv1357c	Rv1141c	Rv1093	Rv1133c	Rv1484	Rv1854c
Rv1227c	Rv1053c	Rv1358	Rv1143	Rv1094	Rv1135.1	Rv1485	Rv1855c
Rv1228	Rv1054	Rv1359	Rv1144	Rv1095	Rv1136	Rv1487	Rv1857
Rv1229c	Rv1056	Rv1360	Rv1145	Rv1096	Rv1137c	Rv1488	Rv1859
Rv1231c	Rv1057	Rv1363c	Rv1146	Rv1097c	Rv1138c	Rv1489	Rv1862
Rv1232c	Rv1058	Rv1364c	Rv1147	Rv1098c	Rv1139c	Rv1490	Rv1864c
Rv1234	Rv1059	Rv1367c	Rv1148c	Rv1099c	Rv1140	Rv1491c	Rv1865c
Rv1235	Rv1061	Rv1368	Rv1149	Rv1100	Rv1141c	Rv1492	Rv1867
Rv1236	Rv1062	Rv1370c	Rv1152	Rv1101c	Rv1142c	Rv1493	Rv1868
Rv1237	Rv1063c	Rv1371	Rv1153c	Rv1102c	Rv1143	Rv1496	Rv1871c
Rv1238	Rv1065	Rv1372	Rv1154c	Rv1104	Rv1144	Rv1497	Rv1872c
Rv1239c	Rv1066	Rv1373	Rv1155	Rv1105	Rv1145	Rv1516c	Rv1875
Rv1241	Rv1067c	Rv1374c	Rv1156	Rv1106c	Rv1146	Rv1517	Rv1877
Rv1244	Rv1068c	Rv1375	Rv1157c	Rv1108c	Rv1147	Rv1520	Rv1879
Rv1245c	Rv1069c	Rv1376	Rv1158c	Rv1109c	Rv1148c	Rv1524	Rv1880c
Rv1246c	Rv1070c	Rv1378c	Rv1159	Rv1110	Rv1149	Rv1527c	Rv1882c
Rv1247c	Rv1072	Rv1379	Rv1160	Rv1112	Rv1152	Rv1531	Rv1883c
Rv1248c	Rv1073	Rv1381	Rv1161	Rv1113	Rv1153c	Rv1532c	Rv1885c
Rv1249c	Rv1074c	Rv1382	Rv1162	Rv1114	Rv1154c	Rv1533	Rv1889c
Rv1251c	Rv1075c	Rv1383	Rv1163	Rv1115	Rv1155	Rv1535	Rv1890c
Rv1253	Rv1076	Rv1384	Rv1165	Rv1116.1	Rv1156	Rv1536	Rv1895
Rv1254	Rv1077	Rv1388	Rv1166	Rv1117	Rv1157c	Rv1537	Rv1896c
Rv1255c	Rv1078	Rv1389	Rv1167c	Rv1118c	Rv1159	Rv1538c	Rv1898
Rv1257c	Rv1079	Rv1391	Rv1168c	Rv1120c	Rv1159A	Rv1540	Rv1900c
Rv1259	Rv1080c	Rv1392	Rv1170	Rv1121	Rv1160	Rv1542c	Rv1901
Rv1260	Rv1081c	Rv1393c	Rv1172c	Rv1122	Rv1161	Rv1543	Rv1904
Rv1261c	Rv1082	Rv1394c	Rv1173	Rv1123c	Rv1162	Rv1544	Rv1908c
Rv1262c	Rv1083	Rv1395	Rv1175c	Rv1124	Rv1163	Rv1546	Rv1912c
Rv1263	Rv1084	Rv1396c	Rv1178	Rv1125	Rv1164	Rv1547	Rv1915
Rv1264	Rv1085c	Rv1397c	Rv1179c	Rv1126c	Rv1165	Rv1549	Rv1916
Rv1265	Rv1086	Rv1399c	Rv1180	Rv1127c	Rv1166	Rv1551	Rv1920
Rv1266c	Rv1087.1	Rv1401	Rv1181	Rv1128c	Rv1167c	Rv1557	Rv1922
Rv1267c	Rv1088	Rv1402	Rv1182	Rv1129c	Rv1168c	Rv1558	Rv1923
Rv1268c	Rv1089	Rv1404	Rv1183	Rv1130	Rv1170	Rv1559	Rv1924c
Rv1269c	Rv1091	Rv1405c	Rv1184c	Rv1131	Rv1171	Rv1562c	Rv1925
Rv1270c	Rv1092c	Rv1406	Rv1185c	Rv1132	Rv1172c	Rv1563c	Rv1928c
Rv1272c	Rv1093	Rv1407	Rv1186c	Rv1133c	Rv1173	Rv1564c	Rv1930c
Rv1273c	Rv1094	Rv1409	Rv1187	Rv1134	Rv1175c	Rv1565c	Rv1931c
Rv1274	Rv1095	Rv1411c	Rv1188	Rv1135.1	Rv1176c	Rv1568	Rv1934c
Rv1275	Rv1096	Rv1412	Rv1189	Rv1135c	Rv1178	Rv1569	Rv1937
Rv1277	Rv1097c	Rv1413	Rv1190	Rv1136	Rv1179c	Rv1570	Rv1938
Rv1279	Rv1098c	Rv1414	Rv1191	Rv1137c	Rv1180	Rv1586c	Rv1940
Rv1280c	Rv1099c	Rv1415	Rv1192	Rv1138c	Rv1181	Rv1589	Rv1943c
Rv1281c	Rv1100	Rv1416	Rv1193	Rv1139c	Rv1182	Rv1590	Rv1947
Rv1282c	Rv1101c	Rv1417	Rv1194c	Rv1141c	Rv1183	Rv1591	Rv1949c
Rv1283c	Rv1103c	Rv1418	Rv1199c	Rv1142c	Rv1184c	Rv1592c	Rv1955
Rv1284	Rv1104	Rv1420	Rv1201c	Rv1143	Rv1185c	Rv1593c	Rv1959c
Rv1285	Rv1105	Rv1421	Rv1202	Rv1144	Rv1186c	Rv1594	Rv1963c
Rv1287	Rv1106c	Rv1422	Rv1203c	Rv1145	Rv1187	Rv1595	Rv1966
Rv1288	Rv1107c	Rv1423	Rv1204c	Rv1146	Rv1188	Rv1596	Rv1967
Rv1289	Rv1108c	Rv1425	Rv1206	Rv1147	Rv1189	Rv1597	Rv1968
Rv1290c	Rv1109c	Rv1426c	Rv1207	Rv1148c	Rv1192	Rv1598c	Rv1969
Rv1290.1	Rv1110	Rv1427c	Rv1208	Rv1149	Rv1193	Rv1599	Rv1970
Rv1291c	Rv1111c	Rv1429	Rv1209	Rv1151c	Rv1194c	Rv1600	Rv1976c
Rv1293	Rv1112	Rv1431	Rv1210	Rv1152	Rv1196	Rv1601	Rv1977
Rv1294	Rv1113	Rv1432	Rv1211	Rv1153c	Rv1197	Rv1602	Rv1985c
Rv1295	Rv1114	Rv1433	Rv1212c	Rv1154c	Rv1199c	Rv1603	Rv1992c
Rv1296	Rv1116	Rv1436	Rv1213	Rv1156	Rv1200	Rv1604	Rv1993c
Rv1297	Rv1116.1	Rv1437	Rv1215c	Rv1157c	Rv1201c	Rv1605	Rv1994c
Rv1298	Rv1117	Rv1438	Rv1216c	Rv1159	Rv1202	Rv1606	Rv1995
Rv1299	Rv1118c	Rv1439c	Rv1217c	Rv1160	Rv1203c	Rv1607	Rv1996
Rv1300	Rv1120c	Rv1440	Rv1219c	Rv1161	Rv1205	Rv1608c	Rv1997
Rv1301	Rv1121	Rv1442	Rv1220c	Rv1162	Rv1206	Rv1609	Rv1998c
Rv1302	Rv1122	Rv1443c	Rv1223	Rv1163	Rv1207	Rv1610	Rv1999c
Rv1303	Rv1123c	Rv1444c	Rv1224	Rv1165	Rv1208	Rv1611	Rv2000
Rv1306	Rv1124	Rv1445c	Rv1226c	Rv1166	Rv1210	Rv1612	Rv2002
Rv1307	Rv1125	Rv1446c	Rv1228	Rv1170	Rv1211	Rv1613	Rv2004c
Rv1308	Rv1126c	Rv1447c	Rv1229c	Rv1172c	Rv1213	Rv1617	Rv2005c
Rv1309	Rv1127c	Rv1448c	Rv1230c	Rv1173	Rv1215c	Rv1618	Rv2006
Rv1310	Rv1128c	Rv1449c	Rv1232c	Rv1175c	Rv1216c	Rv1619	Rv2008c
Rv1311	Rv1129c	Rv1450c	Rv1234	Rv1176c	Rv1217c	Rv1620c	Rv2012
Rv1312	Rv1130	Rv1451	Rv1235	Rv1178	Rv1218c	Rv1621c	Rv2017
Rv1314c	Rv1131	Rv1453	Rv1236	Rv1179c	Rv1219c	Rv1622c	Rv2018
Rv1315	Rv1132	Rv1454c	Rv1237	Rv1180	Rv1220c	Rv1623c	Rv2021c
Rv1316c	Rv1133c	Rv1455	Rv1238	Rv1181	Rv1222	Rv1625c	Rv2022c
Rv1317c	Rv1135.1	Rv1456c	Rv1239c	Rv1182	Rv1223	Rv1626	Rv2023c
Rv3475	Rv1135c	Rv1458c	Rv1240	Rv1183	Rv1224	Rv1629	Rv2027c
Rv0796	Rv1136	Rv1460	Rv1241	Rv1184c	Rv1225c	Rv1630	Rv2029c
Rv2479c	Rv1137c	Rv1461	Rv1244	Rv1185c	Rv1226c	Rv1631	Rv2030c
Rv1369c	Rv1138c	Rv1462	Rv1245c	Rv1186c	Rv1229c	Rv1632c	Rv2032
Rv3187	Rv1140	Rv1463	Rv1246c	Rv1187	Rv1230c	Rv1633	Rv2033c
Rv2814c	Rv1141c	Rv1464	Rv1247c	Rv1188	Rv1231c	Rv1634	Rv2034
Rv2279	Rv1142c	Rv1465	Rv1248c	Rv1189	Rv1232c	Rv1636	Rv2038c
Rv2355	Rv1143	Rv1467c	Rv1249c	Rv1190	Rv1235	Rv1637c	Rv2041c
Rv1764	Rv1144	Rv1469	Rv1250	Rv1191	Rv1236	Rv1638	Rv2045c
Rv2167c	Rv1145	Rv1472	Rv1251c	Rv1192	Rv1237	Rv1639c	Rv2047c
Rv1756c	Rv1146	Rv1473	Rv1252c	Rv1193	Rv1238	Rv1640c	Rv2050
Rv2649	Rv1147	Rv1474c	Rv1253	Rv1194c	Rv1239c	Rv1641	Rv2051c
Rv3185	Rv1148c	Rv1475c	Rv1254	Rv1196	Rv1240	Rv1642	Rv2052c
Rv2106	Rv1149	Rv1477	Rv1255c	Rv1199c	Rv1241	Rv1643	Rv2054
Rv3326	Rv1151c	Rv1478	Rv1256c	Rv1200	Rv1242	Rv1644	Rv2062c
Rv3380c	Rv1152	Rv1479	Rv1257c	Rv1201c	Rv1244	Rv1645c	Rv2064
Rv1320c	Rv1153c	Rv1480	Rv1259	Rv1202	Rv1245c	Rv1647	Rv2065
Rv1321	Rv1154c	Rv1481	Rv1260	Rv1203c	Rv1246c	Rv1649	Rv2066
Rv1322	Rv1155	Rv1482c	Rv1261c	Rv1205	Rv1247c	Rv1650	Rv2068c
Rv1323	Rv1156	Rv1483	Rv1262c	Rv1206	Rv1248c	Rv1652	Rv2070c
Rv1324	Rv1157c	Rv1485	Rv1263	Rv1207	Rv1249c	Rv1653	Rv2071c
Rv1326c	Rv1159	Rv1486c	Rv1264	Rv1208	Rv1251c	Rv1654	Rv2073c
Rv1327c	Rv1160	Rv1488	Rv1265	Rv1209	Rv1252c	Rv1655	Rv2074
Rv1328	Rv1161	Rv1490	Rv1266c	Rv1210	Rv1253	Rv1656	Rv2075c
Rv1329c	Rv1162	Rv1491c	Rv1267c	Rv1211	Rv1258c	Rv1657	Rv2084
Rv1331	Rv1163	Rv1492	Rv1268c	Rv1212c	Rv1259	Rv1658	Rv2086
Rv1332	Rv1164	Rv1493	Rv1269c	Rv1213	Rv1260	Rv1659	Rv2088
Rv1333	Rv1165	Rv1494	Rv1270c	Rv1214c	Rv1261c	Rv1660	Rv2089c
Rv1337	Rv1166	Rv1495	Rv1272c	Rv1215c	Rv1263	Rv1661	Rv2091c
Rv1338	Rv1168c	Rv1496	Rv1273c	Rv1216c	Rv1264	Rv1662	Rv2092c
Rv1340	Rv1170	Rv1497	Rv1275	Rv1217c	Rv1265	Rv1663	Rv2095c
Rv1341	Rv1171	Rv1498c	Rv1276c	Rv1218c	Rv1266c	Rv1664	Rv2096c
Rv1345	Rv1172c	Rv1499	Rv1277	Rv1219c	Rv1267c	Rv1665	Rv2100
Rv1346	Rv1173	Rv1500	Rv1278	Rv1220c	Rv1269c	Rv1666c	Rv2102
Rv1348	Rv1174c	Rv1502	Rv1279	Rv1221	Rv1270c	Rv1667c	Rv2104c
Rv1349	Rv1175c	Rv1503c	Rv1280c	Rv1222	Rv1272c	Rv1668c	Rv2114
Rv1350	Rv1176c	Rv1504c	Rv1281c	Rv1223	Rv1273c	Rv1682	Rv2119
Rv1351	Rv1178	Rv1507.1	Rv1282c	Rv1224	Rv1274	Rv1683	Rv2121c
Rv1353c	Rv1179c	Rv1508c	Rv1284	Rv1225c	Rv1275	Rv1685c	Rv2124c
Rv1354c	Rv1180	Rv1509	Rv1285	Rv1226c	Rv1276c	Rv1687c	Rv2127
Rv1355c	Rv1181	Rv1511	Rv1286	Rv1228	Rv1277	Rv1688	Rv2135c
Rv1356c	Rv1182	Rv1512	Rv1287	Rv1229c	Rv1278	Rv1689	Rv2138
Rv1357c	Rv1183	Rv1513	Rv1288	Rv1230c	Rv1279	Rv1691	Rv2140c
Rv1359	Rv1184c	Rv1514c	Rv1290.1	Rv1231c	Rv1280c	Rv1692	Rv2142c
Rv1360	Rv1185c	Rv1515c	Rv1290c	Rv1232c	Rv1281c	Rv1693	Rv2143
Rv1361c	Rv1186c	Rv1516c	Rv1292	Rv1234	Rv1282c	Rv1694	Rv2145c
Rv1362c	Rv1187	Rv1518	Rv1293	Rv1235	Rv1283c	Rv1695	Rv2148c
Rv1363c	Rv1188	Rv1520	Rv1294	Rv1236	Rv1284	Rv1696	Rv2149c
Rv1366	Rv1189	Rv1521	Rv1295	Rv1237	Rv1285	Rv1697	Rv2150c
Rv1368	Rv1190	Rv1522c	Rv1296	Rv1238	Rv1286	Rv1698	Rv2151c
Rv1371	Rv1191	Rv1523	Rv1297	Rv1239c	Rv1287	Rv1699	Rv2152c
Rv1372	Rv1192	Rv1524	Rv1298	Rv1240	Rv1288	Rv1700	Rv2154c
Rv1373	Rv1193	Rv1525	Rv1299	Rv1241	Rv1289	Rv1701	Rv2155c
Rv1374c	Rv1194c	Rv1527c	Rv1300	Rv1244	Rv1290.1	Rv1702c	Rv2158c
Rv1375	Rv1196	Rv1529	Rv1302	Rv1245c	Rv1290c	Rv1703c	Rv2159c
Rv1376	Rv1197	Rv1530	Rv1306	Rv1246c	Rv1292	Rv1708	Rv2163c
Rv1377c	Rv1199c	Rv1532c	Rv1307	Rv1247c	Rv1293	Rv1709	Rv2164c
Rv1379	Rv1201c	Rv1534	Rv1308	Rv1248c	Rv1294	Rv1710	Rv2165c
Rv1380	Rv1202	Rv1535	Rv1309	Rv1249c	Rv1295	Rv1711	Rv2166c
Rv1381	Rv1203c	Rv1536	Rv1310	Rv1250	Rv1296	Rv1712	Rv2170
Rv1382	Rv1204c	Rv1537	Rv1312	Rv1251c	Rv1297	Rv1713	Rv2172c
Rv1383	Rv1205	Rv1538c	Rv1313c	Rv1252c	Rv1298	Rv1722	Rv2173
Rv1384	Rv1206	Rv1540	Rv1314c	Rv1253	Rv1299	Rv1723	Rv2175c
Rv1385	Rv1207	Rv1543	Rv1315	Rv1254	Rv1300	Rv1729c	Rv2178c
Rv1386	Rv1208	Rv1544	Rv1316c	Rv1255c	Rv1301	Rv1733c	Rv2181
Rv1387	Rv1209	Rv1545	Rv1317c	Rv1259	Rv1302	Rv1746	Rv2182c
Rv1388	Rv1210	Rv1547	Rv1318c	Rv1260	Rv1303	Rv1747	Rv2183c
Rv1392	Rv1211	Rv1550	Rv1319c	Rv1261c	Rv1306	Rv1748	Rv2184c
Rv1394c	Rv1212c	Rv1551	Rv1320c	Rv1262c	Rv1307	Rv1750c	Rv2187
Rv1395	Rv1213	Rv1552	Rv1321	Rv1263	Rv1308	Rv1751	Rv2188c
Rv1397c	Rv1215c	Rv1553	Rv1322	Rv1264	Rv1309	Rv1752	Rv2189c
Rv1399c	Rv1216c	Rv1554	Rv1322.1	Rv1265	Rv1310	Rv1760	Rv2191
Rv1400c	Rv1217c	Rv1555	Rv1323	Rv1266c	Rv1311	Rv1765c	Rv2195
Rv1402	Rv1218c	Rv1556	Rv1324	Rv1267c	Rv1312	Rv1776c	Rv2200c
Rv1403c	Rv1219c	Rv1557	Rv1325c	Rv1269c	Rv1313c	Rv1777	Rv2201
Rv1404	Rv1220c	Rv1558	Rv1326c	Rv1270c	Rv1314c	Rv1779c	Rv2202c
Rv1405c	Rv1221	Rv1559	Rv1327c	Rv1271c	Rv1315	Rv1780	Rv2207
Rv1406	Rv1222	Rv1561	Rv1328	Rv1272c	Rv1317c	Rv1781c	Rv2209
Rv1407	Rv1223	Rv1562c	Rv1329c	Rv1273c	Rv1318c	Rv1782	Rv2212
Rv1408	Rv1224	Rv1563c	Rv1330c	Rv1274	Rv1319c	Rv1783	Rv2213
Rv1409	Rv1225c	Rv1564c	Rv1331	Rv1275	Rv1320c	Rv1784	Rv2214c
Rv1411c	Rv1226c	Rv1565c	Rv1332	Rv1276c	Rv1321	Rv1785c	Rv2215
Rv1412	Rv1227c	Rv1569	Rv1333	Rv1277	Rv1323	Rv1786	Rv2216
Rv1413	Rv1229c	Rv1570	Rv1336	Rv1278	Rv1324	Rv1787	Rv2217
Rv1414	Rv1230c	Rv1571	Rv1339	Rv1279	Rv1326c	Rv1789	Rv2218
Rv1415	Rv1231c	Rv1589	Rv1342c	Rv1280c	Rv1327c	Rv1790	Rv2219
Rv1416	Rv1232c	Rv1592c	Rv1345	Rv1281c	Rv1328	Rv1794	Rv2219.1
Rv1418	Rv1234	Rv1593c	Rv1346	Rv1282c	Rv1329c	Rv1795	Rv2220
Rv1420	Rv1235	Rv1594	Rv1348	Rv1283c	Rv1330c	Rv1796	Rv2221c
Rv1421	Rv1236	Rv1595	Rv1349	Rv1284	Rv1331	Rv1797	Rv2224c
Rv1422	Rv1238	Rv1598c	Rv1350	Rv1285	Rv1332	Rv1798	Rv2228c
Rv1423	Rv1239c	Rv1600	Rv1351	Rv1286	Rv1333	Rv1806	Rv2229c
Rv1424c	Rv1240	Rv1602	Rv1353c	Rv1287	Rv1334	Rv1809	Rv2230c
Rv1425	Rv1241	Rv1603	Rv1354c	Rv1288	Rv1335	Rv1810	Rv2234
Rv1426c	Rv1242	Rv1604	Rv1355c	Rv1289	Rv1336	Rv1811	Rv2235
Rv1427c	Rv1244	Rv1605	Rv1356c	Rv1290.1	Rv1337	Rv1812c	Rv2238c
Rv1428c	Rv1245c	Rv1608c	Rv1357c	Rv1290c	Rv1338	Rv1814	Rv2240c
Rv1429	Rv1246c	Rv1609	Rv1358	Rv1291c	Rv1343c	Rv1815	Rv2241
Rv1430	Rv1247c	Rv1611	Rv1359	Rv1292	Rv1344	Rv1816	Rv2242
Rv1431	Rv1248c	Rv1612	Rv1360	Rv1293	Rv1345	Rv1817	Rv2244
Rv1432	Rv1249c	Rv1613	Rv1361c	Rv1294	Rv1346	Rv1819c	Rv2246
Rv1433	Rv1250	Rv1615	Rv1362c	Rv1295	Rv1347c	Rv1820	Rv2247
Rv1436	Rv1251c	Rv1617	Rv1363c	Rv1296	Rv1348	Rv1821	Rv2249c
Rv1437	Rv1252c	Rv1618	Rv1364c	Rv1297	Rv1349	Rv1822	Rv2251
Rv1438	Rv1253	Rv1619	Rv1366	Rv1298	Rv1350	Rv1823	Rv2252
Rv1439c	Rv1254	Rv1621c	Rv1367c	Rv1299	Rv1351	Rv1825	Rv2253
Rv1442	Rv1255c	Rv1622c	Rv1368	Rv1300	Rv1352	Rv1828	Rv2258c
Rv1443c	Rv1256c	Rv1624c	Rv1369c	Rv1301	Rv1353c	Rv1829	Rv2263
Rv1444c	Rv1257c	Rv1625c	Rv1370c	Rv1302	Rv1354c	Rv1830	Rv2265
Rv1445c	Rv1259	Rv1626	Rv1371	Rv1304	Rv1355c	Rv1832	Rv2266
Rv1447c	Rv1260	Rv1627c	Rv1372	Rv1306	Rv1356c	Rv1834	Rv2268c
Rv1448c	Rv1261c	Rv1628c	Rv1373	Rv1307	Rv1357c	Rv1836c	Rv2275
Rv1449c	Rv1262c	Rv1629	Rv1374c	Rv1308	Rv1358	Rv1837c	Rv2276
Rv1453	Rv1263	Rv1630	Rv1375	Rv1309	Rv1360	Rv1841c	Rv2281
Rv1454c	Rv1264	Rv1631	Rv1376	Rv1310	Rv1362c	Rv1842c	Rv2282c
Rv1455	Rv1265	Rv1633	Rv1377c	Rv1312	Rv1364c	Rv1843c	Rv2284
Rv1456c	Rv1266c	Rv1635c	Rv1378c	Rv1315	Rv1365c	Rv1844c	Rv2285
Rv1457c	Rv1267c	Rv1636	Rv1379	Rv1316c	Rv1366	Rv1845c	Rv2286c
Rv1458c	Rv1268c	Rv1638	Rv1380	Rv1317c	Rv1367c	Rv1846c	Rv2294
Rv1459c	Rv1269c	Rv1638.1	Rv1381	Rv1318c	Rv1368	Rv1854c	Rv2296
Rv1460	Rv1270c	Rv1640c	Rv1382	Rv1319c	Rv1369c	Rv1855c	Rv2297
Rv1461	Rv1271c	Rv1641	Rv1383	Rv1320c	Rv1371	Rv1856c	Rv2298
Rv1462	Rv1272c	Rv1645c	Rv1384	Rv1321	Rv1372	Rv1857	Rv2299c
Rv1463	Rv1273c	Rv1647	Rv1386	Rv1322.1	Rv1373	Rv1858	Rv2300c
Rv1464	Rv1274	Rv1650	Rv1388	Rv1323	Rv1374c	Rv1859	Rv2303c
Rv1465	Rv1275	Rv1653	Rv1389	Rv1324	Rv1375	Rv1860	Rv2305
Rv1467c	Rv1276c	Rv1655	Rv1391	Rv1325c	Rv1376	Rv1863c	Rv2307c
Rv1469	Rv1277	Rv1656	Rv1392	Rv1326c	Rv1378c	Rv1865c	Rv2307.2
Rv1471	Rv1278	Rv1657	Rv1393c	Rv1327c	Rv1379	Rv1866	Rv2308
Rv1472	Rv1279	Rv1658	Rv1394c	Rv1328	Rv1380	Rv1867	Rv2309c
Rv1473	Rv1280c	Rv1659	Rv1395	Rv1329c	Rv1381	Rv1868	Rv2310
Rv1474c	Rv1281c	Rv1660	Rv1396c	Rv1330c	Rv1382	Rv1869c	Rv2311
Rv1475c	Rv1282c	Rv1661	Rv1398c	Rv1331	Rv1383	Rv1870c	Rv2314c
Rv1476	Rv1284	Rv1662	Rv1399c	Rv1332	Rv1384	Rv1871c	Rv2315c
Rv1477	Rv1285	Rv1663	Rv1400c	Rv1333	Rv1385	Rv1872c	Rv2318
Rv1479	Rv1286	Rv1664	Rv1402	Rv1334	Rv1387	Rv1873	Rv2320c
Rv1480	Rv1287	Rv1666c	Rv1403c	Rv1336	Rv1388	Rv1876	Rv2324
Rv1481	Rv1288	Rv1667c	Rv1404	Rv1337	Rv1389	Rv1877	Rv2325c
Rv1482c	Rv1289	Rv1668c	Rv1406	Rv1338	Rv1391	Rv1878	Rv2326c
Rv1483	Rv1290.1	Rv1671	Rv1407	Rv1340	Rv1392	Rv1879	Rv2327
Rv1484	Rv1290c	Rv1673c	Rv1408	Rv1342c	Rv1393c	Rv1880c	Rv2329c
Rv1485	Rv1292	Rv1674c	Rv1409	Rv1343c	Rv1394c	Rv1882c	Rv2331
Rv1487	Rv1293	Rv1675c	Rv1410c	Rv1345	Rv1395	Rv1884c	Rv2331.1
Rv1488	Rv1294	Rv1676	Rv1411c	Rv1346	Rv1396c	Rv1885c	Rv2332
Rv1490	Rv1295	Rv1677	Rv1412	Rv1347c	Rv1397c	Rv1886c	Rv2334
Rv1491c	Rv1296	Rv1679	Rv1413	Rv1348	Rv1398c	Rv1887	Rv2335
Rv1493	Rv1297	Rv1680	Rv1414	Rv1349	Rv1399c	Rv1888c	Rv2336
Rv1494	Rv1298	Rv1681	Rv1415	Rv1350	Rv1400c	Rv1890c	Rv2337c
Rv1495	Rv1299	Rv1682	Rv1416	Rv1351	Rv1402	Rv1892	Rv2338c
Rv1496	Rv1300	Rv1683	Rv1417	Rv1352	Rv1403c	Rv1894c	Rv2339
Rv1497	Rv1301	Rv1685c	Rv1418	Rv1353c	Rv1404	Rv1895	Rv2340c
Rv1498c	Rv1302	Rv1689	Rv1420	Rv1354c	Rv1405c	Rv1896c	Rv2343c
Rv1499	Rv1303	Rv1692	Rv1421	Rv1355c	Rv1406	Rv1897c	Rv2344c
Rv1500	Rv1306	Rv1694	Rv1422	Rv1356c	Rv1407	Rv1900c	Rv2345
Rv1504c	Rv1307	Rv1695	Rv1423	Rv1357c	Rv1408	Rv1901	Rv2347c
Rv1506c	Rv1308	Rv1696	Rv1424c	Rv1358	Rv1409	Rv1902c	Rv2350c
Rv1507c	Rv1309	Rv1697	Rv1425	Rv1359	Rv1411c	Rv1905c	Rv2351c
Rv1507.1	Rv1310	Rv1699	Rv1426c	Rv1360	Rv1412	Rv1908c	Rv2356c
Rv1508c	Rv1311	Rv1700	Rv1427c	Rv1362c	Rv1413	Rv1909c	Rv2357c
Rv1508.1	Rv1312	Rv1701	Rv1428c	Rv1363c	Rv1415	Rv1910c	Rv2360c
Rv1509	Rv1313c	Rv1706.1	Rv1429	Rv1364c	Rv1416	Rv1911c	Rv2361c
Rv1511	Rv1314c	Rv1706c	Rv1430	Rv1366	Rv1417	Rv1913	Rv2362c
Rv1512	Rv1315	Rv1710	Rv1431	Rv1367c	Rv1418	Rv1915	Rv2363
Rv1513	Rv1316c	Rv1711	Rv1432	Rv1368	Rv1420	Rv1916	Rv2366c
Rv1514c	Rv1317c	Rv1712	Rv1433	Rv1369c	Rv1421	Rv1919c	Rv2368c
Rv1515c	Rv1318c	Rv1713	Rv1435c	Rv1371	Rv1422	Rv1920	Rv2370c
Rv1516c	Rv1319c	Rv1715	Rv1436	Rv1372	Rv1423	Rv1925	Rv2373c
Rv1517	Rv1320c	Rv1716	Rv1437	Rv1373	Rv1424c	Rv1928c	Rv2375
Rv1521	Rv1321	Rv1718	Rv1438	Rv1374c	Rv1425	Rv1929c	Rv2381c
Rv1522c	Rv1322	Rv1719	Rv1439c	Rv1375	Rv1426c	Rv1930c	Rv2382c
Rv1523	Rv1322.1	Rv1721c	Rv1442	Rv1376	Rv1427c	Rv1931c	Rv2383c
Rv1524	Rv1323	Rv1722	Rv1443c	Rv1377c	Rv1428c	Rv1935c	Rv2384
Rv1525	Rv1324	Rv1723	Rv1444c	Rv1378c	Rv1429	Rv1960c	Rv2385
Rv1526c	Rv1325c	Rv1724c	Rv1445c	Rv1379	Rv1431	Rv1963c	Rv2386c
Rv1528c	Rv1326c	Rv1725c	Rv1446c	Rv1380	Rv1432	Rv1965	Rv2389c
Rv1529	Rv1327c	Rv1726	Rv1447c	Rv1381	Rv1433	Rv1966	Rv2391
Rv1530	Rv1328	Rv1728c	Rv1448c	Rv1382	Rv1435c	Rv1967	Rv2393
Rv1531	Rv1329c	Rv1729c	Rv1449c	Rv1383	Rv1436	Rv1968	Rv2397c
Rv1532c	Rv1330c	Rv1730c	Rv1450c	Rv1384	Rv1437	Rv1969	Rv2399c
Rv1533	Rv1331	Rv1731	Rv1453	Rv1385	Rv1438	Rv1973	Rv2402
Rv1534	Rv1332	Rv1733c	Rv1454c	Rv1386	Rv1439c	Rv1974	Rv2403c
Rv1536	Rv1333	Rv1736c	Rv1455	Rv1387	Rv1440	Rv1976c	Rv2404c
Rv1538c	Rv1334	Rv1738	Rv1456c	Rv1388	Rv1441c	Rv1978	Rv2406c
Rv1540	Rv1335	Rv1739c	Rv1457c	Rv1389	Rv1442	Rv1980c	Rv2407
Rv1541c	Rv1336	Rv1742	Rv1458c	Rv1391	Rv1443c	Rv1981c	Rv2408
Rv1542c	Rv1337	Rv1743	Rv1459c	Rv1392	Rv1444c	Rv1998c	Rv2409c
Rv1543	Rv1338	Rv1744c	Rv1460	Rv1393c	Rv1445c	Rv2000	Rv2410c
Rv1544	Rv1339	Rv1745c	Rv1461	Rv1394c	Rv1446c	Rv2002	Rv2411c
Rv1546	Rv1340	Rv1746	Rv1462	Rv1395	Rv1447c	Rv2005c	Rv2412
Rv1547	Rv1341	Rv1747	Rv1464	Rv1398c	Rv1448c	Rv2007c	Rv2413c
Rv1550	Rv1344	Rv1748	Rv1465	Rv1400c	Rv1449c	Rv2014	Rv2414c
Rv1551	Rv1345	Rv1750c	Rv1466	Rv1401	Rv1450c	Rv2015c	Rv2415c
Rv1552	Rv1346	Rv1751	Rv1467c	Rv1402	Rv1451	Rv2017	Rv2417c
Rv1555	Rv1347c	Rv1752	Rv1468c	Rv1403c	Rv1452c	Rv2025c	Rv2421c
Rv1556	Rv1348	Rv1754c	Rv1469	Rv1404	Rv1453	Rv2026c	Rv2423
Rv1557	Rv1349	Rv1757c	Rv1470	Rv1405c	Rv1454c	Rv2033c	Rv2426c
Rv1558	Rv1350	Rv1760	Rv1471	Rv1406	Rv1455	Rv2034	Rv2427c
Rv1559	Rv1351	Rv1762c	Rv1472	Rv1407	Rv1456c	Rv2036	Rv2435c
Rv1562c	Rv1352	Rv1763	Rv1473	Rv1408	Rv1458c	Rv2037c	Rv2439c
Rv1563c	Rv1353c	Rv1765c	Rv1473.1	Rv1409	Rv1460	Rv2038c	Rv2440c
Rv1564c	Rv1354c	Rv1767	Rv1474c	Rv1411c	Rv1461	Rv2039c	Rv2444c
Rv1565c	Rv1355c	Rv1769	Rv1475c	Rv1412	Rv1462	Rv2040c	Rv2445c
Rv1566c	Rv1356c	Rv1770	Rv1476	Rv1414	Rv1463	Rv2041c	Rv2447c
Rv1568	Rv1357c	Rv1771	Rv1477	Rv1415	Rv1464	Rv2042c	Rv2448c
Rv1570	Rv1358	Rv1772	Rv1478	Rv1416	Rv1466	Rv2045c	Rv2449c
Rv1571	Rv1359	Rv1773c	Rv1479	Rv1417	Rv1467c	Rv2046	Rv2450c
Rv1588c	Rv1360	Rv1775	Rv1480	Rv1418	Rv1469	Rv2047c	Rv2453c
Rv1591	Rv1361c	Rv1776c	Rv1481	Rv1420	Rv1470	Rv2048c	Rv2454c
Rv1592c	Rv1362c	Rv1777	Rv1482c	Rv1421	Rv1471	Rv2052c	Rv2455c
Rv1593c	Rv1363c	Rv1778c	Rv1483	Rv1422	Rv1472	Rv2053c	Rv2456c
Rv1594	Rv1364c	Rv1779c	Rv1484	Rv1423	Rv1473	Rv2054	Rv2457c
Rv1595	Rv1365c	Rv1780	Rv1485	Rv1424c	Rv1473.1	Rv2058c	Rv2461c
Rv1597	Rv1366	Rv1781c	Rv1486c	Rv1425	Rv1474c	Rv2059	Rv2462c
Rv1598c	Rv1367c	Rv1782	Rv1487	Rv1426c	Rv1475c	Rv2062c	Rv2463
Rv1601	Rv1368	Rv1784	Rv1488	Rv1427c	Rv1476	Rv2065	Rv2466c
Rv1602	Rv1369c	Rv1785c	Rv1489.1	Rv1428c	Rv1477	Rv2066	Rv2467
Rv1603	Rv1370c	Rv1790	Rv1490	Rv1429	Rv1478	Rv2067c	Rv2468c
Rv1604	Rv1371	Rv1796	Rv1491c	Rv1430	Rv1479	Rv2069	Rv2469c
Rv1606	Rv1372	Rv1797	Rv1492	Rv1431	Rv1480	Rv2070c	Rv2470
Rv1608c	Rv1373	Rv1798	Rv1493	Rv1432	Rv1481	Rv2072c	Rv2471
Rv1609	Rv1374c	Rv1800	Rv1495	Rv1433	Rv1482c	Rv2073c	Rv2476c
Rv1610	Rv1375	Rv1802	Rv1496	Rv1434	Rv1483	Rv2074	Rv2477c
Rv1612	Rv1376	Rv1803c	Rv1497	Rv1436	Rv1484	Rv2077c	Rv2483c
Rv1613	Rv1377c	Rv1805c	Rv1498c	Rv1437	Rv1486c	Rv2078	Rv2486
Rv1616	Rv1378c	Rv1808	Rv1499	Rv1438	Rv1487	Rv2079	Rv2488c
Rv1617	Rv1379	Rv1809	Rv1500	Rv1439c	Rv1488	Rv2083	Rv2491
Rv1618	Rv1380	Rv1810	Rv1501	Rv1440	Rv1489.1	Rv2089c	Rv2496c
Rv1619	Rv1381	Rv1811	Rv1502	Rv1442	Rv1490	Rv2090	Rv2497c
Rv1620c	Rv1382	Rv1812c	Rv1503c	Rv1443c	Rv1492	Rv2094c	Rv2499c
Rv1621c	Rv1383	Rv1814	Rv1504c	Rv1444c	Rv1493	Rv2095c	Rv2500c
Rv1622c	Rv1384	Rv1815	Rv1505c	Rv1445c	Rv1494	Rv2096c	Rv2501c
Rv1623c	Rv1385	Rv1816	Rv1507.1	Rv1446c	Rv1495	Rv2097c	Rv2502c
Rv1625c	Rv1386	Rv1817	Rv1507c	Rv1447c	Rv1496	Rv2110c	Rv2503c
Rv1626	Rv1388	Rv1819c	Rv1508c	Rv1448c	Rv1497	Rv2114	Rv2505c
Rv1627c	Rv1389	Rv1820	Rv1509	Rv1449c	Rv1498c	Rv2115c	Rv2506
Rv1629	Rv1390	Rv1821	Rv1511	Rv1450c	Rv1499	Rv2117	Rv2510c
Rv1630	Rv1391	Rv1824	Rv1512	Rv1451	Rv1500	Rv2118c	Rv2511
Rv1631	Rv1392	Rv1825	Rv1513	Rv1452c	Rv1501	Rv2119	Rv2513
Rv1635c	Rv1393c	Rv1827	Rv1514c	Rv1453	Rv1502	Rv2121c	Rv2515c
Rv1636	Rv1394c	Rv1828	Rv1515c	Rv1454c	Rv1503c	Rv2122c	Rv2516c
Rv1637c	Rv1395	Rv1830	Rv1516c	Rv1455	Rv1505c	Rv2129c	Rv2521
Rv1638.1	Rv1397c	Rv1832	Rv1518	Rv1456c	Rv1517	Rv2130c	Rv2522c
Rv1641	Rv1399c	Rv1833c	Rv1520	Rv1457c	Rv1518	Rv2131c	Rv2524c
Rv1644	Rv1400c	Rv1834	Rv1521	Rv1458c	Rv1519	Rv2133c	Rv2525c
Rv1645c	Rv1401	Rv1835c	Rv1522c	Rv1459c	Rv1520	Rv2134c	Rv2528c
Rv1647	Rv1402	Rv1837c	Rv1523	Rv1460	Rv1521	Rv2135c	Rv2529
Rv1649	Rv1403c	Rv1839c	Rv1524	Rv1461	Rv1522c	Rv2136c	Rv2530c
Rv1652	Rv1404	Rv1841c	Rv1525	Rv1462	Rv1523	Rv2137c	Rv2531c
Rv1653	Rv1405c	Rv1842c	Rv1526c	Rv1463	Rv1524	Rv2138	Rv2534c
Rv1654	Rv1406	Rv1843c	Rv1527c	Rv1464	Rv1525	Rv2139	Rv2535c
Rv1655	Rv1407	Rv1844c	Rv1528c	Rv1465	Rv1526c	Rv2141c	Rv2536
Rv1656	Rv1409	Rv1845c	Rv1529	Rv1466	Rv1527c	Rv2143	Rv2538c
Rv1658	Rv1410c	Rv1846c	Rv1530	Rv1467c	Rv1528c	Rv2144c	Rv2542
Rv1659	Rv1411c	Rv1847	Rv1531	Rv1469	Rv1529	Rv2145c	Rv2544
Rv1660	Rv1412	Rv1848	Rv1532c	Rv1470	Rv1530	Rv2146c	Rv2547
Rv1664	Rv1413	Rv1849	Rv1534	Rv1472	Rv1531	Rv2147c	Rv2553c
Rv1665	Rv1414	Rv1850	Rv1535	Rv1473	Rv1532c	Rv2148c	Rv2555c
Rv1666c	Rv1415	Rv1851	Rv1536	Rv1473.1	Rv1533	Rv2149c	Rv2557
Rv1668c	Rv1417	Rv1852	Rv1537	Rv1474c	Rv1534	Rv2150c	Rv2559c
Rv1670	Rv1418	Rv1854c	Rv1538c	Rv1475c	Rv1535	Rv2151c	Rv2563
Rv1672c	Rv1420	Rv1855c	Rv1541c	Rv1477	Rv1536	Rv2152c	Rv2564
Rv1673c	Rv1421	Rv1857	Rv1542c	Rv1478	Rv1537	Rv2153c	Rv2565
Rv1675c	Rv1422	Rv1859	Rv1543	Rv1479	Rv1538c	Rv2154c	Rv2567
Rv1676	Rv1423	Rv1862	Rv1544	Rv1480	Rv1540	Rv2155c	Rv2569c
Rv1677	Rv1424c	Rv1863c	Rv1545	Rv1481	Rv1542c	Rv2156c	Rv2570
Rv1678	Rv1425	Rv1864c	Rv1546	Rv1482c	Rv1543	Rv2157c	Rv2571c
Rv1679	Rv1426c	Rv1865c	Rv1547	Rv1483	Rv1544	Rv2158c	Rv2572c
Rv1680	Rv1427c	Rv1867	Rv1549	Rv1484	Rv1547	Rv2163c	Rv2578c
Rv1681	Rv1428c	Rv1868	Rv1550	Rv1485	Rv1549	Rv2164c	Rv2579
Rv1682	Rv1429	Rv1870c	Rv1551	Rv1486c	Rv1551	Rv2165c	Rv2580c
Rv1683	Rv1431	Rv1871c	Rv1552	Rv1487	Rv1552	Rv2166c	Rv2583c
Rv1685c	Rv1432	Rv1872c	Rv1553	Rv1488	Rv1553	Rv2169c	Rv2585c
Rv1686c	Rv1433	Rv1875	Rv1556	Rv1490	Rv1556	Rv2170	Rv2586c
Rv1687c	Rv1435c	Rv1876	Rv1557	Rv1491c	Rv1557	Rv2171	Rv2587c
Rv1688	Rv1436	Rv1877	Rv1558	Rv1492	Rv1558	Rv2172c	Rv2589
Rv1689	Rv1437	Rv1878	Rv1559	Rv1493	Rv1559	Rv2173	Rv2590
Rv1690	Rv1438	Rv1879	Rv1561	Rv1494	Rv1560	Rv2175c	Rv2592c
Rv1691	Rv1439c	Rv1880c	Rv1562c	Rv1495	Rv1562c	Rv2176	Rv2593c
Rv1692	Rv1440	Rv1881c	Rv1563c	Rv1496	Rv1563c	Rv2178c	Rv2594c
Rv1694	Rv1441c	Rv1882c	Rv1564c	Rv1497	Rv1564c	Rv2179c	Rv2597
Rv1695	Rv1442	Rv1883c	Rv1565c	Rv1498c	Rv1565c	Rv2180c	Rv2604c
Rv1696	Rv1443c	Rv1884c	Rv1566c	Rv1500	Rv1566c	Rv2181	Rv2605c
Rv1697	Rv1444c	Rv1885c	Rv1568	Rv1501	Rv1567c	Rv2182c	Rv2606c
Rv1698	Rv1446c	Rv1887	Rv1569	Rv1502	Rv1569	Rv2184c	Rv2609c
Rv1699	Rv1447c	Rv1889c	Rv1570	Rv1503c	Rv1570	Rv2185c	Rv2610c
Rv1700	Rv1448c	Rv1890c	Rv1571	Rv1505c	Rv1571	Rv2186c	Rv2611c
Rv1701	Rv1449c	Rv1892	Rv1574	Rv1517	Rv1587c	Rv2187	Rv2614c
Rv1702c	Rv1450c	Rv1893	Rv1575	Rv1518	Rv1589	Rv2188c	Rv2617c
Rv1703c	Rv1453	Rv1894c	Rv1576c	Rv1520	Rv1590	Rv2189c	Rv2621c
Rv1704c	Rv1454c	Rv1895	Rv1577c	Rv1521	Rv1591	Rv2190c	Rv2622
Rv1705c	Rv1455	Rv1896c	Rv1578c	Rv1522c	Rv1592c	Rv2191	Rv2624c
Rv1706c	Rv1456c	Rv1898	Rv1580c	Rv1523	Rv1593c	Rv2192c	Rv2625c
Rv1707	Rv1457c	Rv1899c	Rv1581c	Rv1524	Rv1594	Rv2194	Rv2627c
Rv1708	Rv1458c	Rv1900c	Rv1582c	Rv1525	Rv1595	Rv2195	Rv2630
Rv1710	Rv1459c	Rv1901	Rv1583c	Rv1526c	Rv1596	Rv2196	Rv2631
Rv1711	Rv1460	Rv1904	Rv1584c	Rv1527c	Rv1597	Rv2197c	Rv2632c
Rv1712	Rv1461	Rv1907c	Rv1585c	Rv1528c	Rv1598c	Rv2198c	Rv2633c
Rv1713	Rv1462	Rv1908c	Rv1586c	Rv1529	Rv1599	Rv2200c	Rv2636
Rv1714	Rv1463	Rv1911c	Rv1587c	Rv1530	Rv1600	Rv2201	Rv2638
Rv1715	Rv1464	Rv1912c	Rv1588c	Rv1531	Rv1601	Rv2202c	Rv2643
Rv1718	Rv1466	Rv1914c	Rv1589	Rv1532c	Rv1603	Rv2203	Rv2646
Rv1719	Rv1467c	Rv1915	Rv1590	Rv1533	Rv1605	Rv2204c	Rv2650c
Rv1720c	Rv1469	Rv1916	Rv1592c	Rv1534	Rv1606	Rv2205c	Rv2651c
Rv1723	Rv1472	Rv1920	Rv1593c	Rv1535	Rv1608c	Rv2206	Rv2655c
Rv1725c	Rv1473	Rv1922	Rv1594	Rv1536	Rv1609	Rv2207	Rv2659c
Rv1726	Rv1474c	Rv1923	Rv1595	Rv1537	Rv1610	Rv2208	Rv2667
Rv1727	Rv1475c	Rv1924c	Rv1598c	Rv1538c	Rv1611	Rv2210c	Rv2669
Rv1729c	Rv1477	Rv1925	Rv1599	Rv1539	Rv1612	Rv2211c	Rv2670c
Rv1731	Rv1478	Rv1926c	Rv1600	Rv1540	Rv1613	Rv2213	Rv2671
Rv1732c	Rv1479	Rv1928c	Rv1601	Rv1542c	Rv1614	Rv2214c	Rv2673
Rv1733c	Rv1480	Rv1930c	Rv1602	Rv1543	Rv1617	Rv2215	Rv2676c
Rv1734c	Rv1481	Rv1931c	Rv1604	Rv1544	Rv1618	Rv2216	Rv2677c
Rv1736c	Rv1482c	Rv1933c	Rv1605	Rv1546	Rv1619	Rv2217	Rv2678c
Rv1737c	Rv1483	Rv1934c	Rv1608c	Rv1547	Rv1620c	Rv2218	Rv2679
Rv1739c	Rv1484	Rv1936	Rv1609	Rv1549	Rv1621c	Rv2219	Rv2681
Rv1741	Rv1485	Rv1937	Rv1610	Rv1551	Rv1622c	Rv2219.1	Rv2686c
Rv1742	Rv1486c	Rv1938	Rv1611	Rv1552	Rv1623c	Rv2220	Rv2691
Rv1743	Rv1487	Rv1940	Rv1612	Rv1553	Rv1624c	Rv2221c	Rv2692
Rv1744c	Rv1488	Rv1943c	Rv1613	Rv1555	Rv1625c	Rv2222c	Rv2694c
Rv1745c	Rv1489	Rv1945	Rv1614	Rv1556	Rv1626	Rv2223c	Rv2696c
Rv1746	Rv1489.1	Rv1947	Rv1615	Rv1557	Rv1627c	Rv2224c	Rv2698
Rv1747	Rv1490	Rv1949c	Rv1616	Rv1558	Rv1628c	Rv2225	Rv2701c
Rv1748	Rv1491c	Rv1952	Rv1617	Rv1559	Rv1629	Rv2226	Rv2703
Rv1749c	Rv1492	Rv1955	Rv1618	Rv1560	Rv1630	Rv2227	Rv2711
Rv1750c	Rv1493	Rv1957	Rv1619	Rv1561	Rv1631	Rv2228c	Rv2713
Rv1751	Rv1495	Rv1958c	Rv1620c	Rv1562c	Rv1632c	Rv2229c	Rv2715
Rv1752	Rv1496	Rv1959c	Rv1621c	Rv1564c	Rv1633	Rv2230c	Rv2718c
Rv1755c	Rv1497	Rv1960c	Rv1622c	Rv1565c	Rv1634	Rv2231c	Rv2719c
Rv1761c	Rv1498c	Rv1962c	Rv1625c	Rv1566c	Rv1635c	Rv2232	Rv2720
Rv1762c	Rv1499	Rv1963c	Rv1626	Rv1567c	Rv1636	Rv2234	Rv2721c
Rv2015c	Rv1500	Rv1964	Rv1627c	Rv1568	Rv1637c	Rv2235	Rv2723
Rv1766	Rv1501	Rv1966	Rv1628c	Rv1569	Rv1638	Rv2236c	Rv2724c
Rv1767	Rv1502	Rv1967	Rv1629	Rv1570	Rv1638.1	Rv2241	Rv2725c
Rv1770	Rv1503c	Rv1968	Rv1630	Rv1571	Rv1640c	Rv2242	Rv2726c
Rv1771	Rv1504c	Rv1969	Rv1631	Rv1573	Rv1641	Rv2243	Rv2727c
Rv1772	Rv1507.1	Rv1970	Rv1633	Rv1575	Rv1642	Rv2244	Rv2731
Rv1773c	Rv1507c	Rv1976c	Rv1635c	Rv1576c	Rv1643	Rv2245	Rv2732c
Rv1774	Rv1508.1	Rv1977	Rv1636	Rv1577c	Rv1644	Rv2246	Rv2733c
Rv1775	Rv1508c	Rv1979c	Rv1637c	Rv1578c	Rv1645c	Rv2247	Rv2734
Rv1776c	Rv1509	Rv1980c	Rv1638	Rv1580c	Rv1647	Rv2249c	Rv2735c
Rv1778c	Rv1510	Rv1981c	Rv1638.1	Rv1581c	Rv1648	Rv2250c	Rv2736c
Rv1779c	Rv1511	Rv1985c	Rv1639c	Rv1582c	Rv1649	Rv2251	Rv2737c
Rv1780	Rv1512	Rv1987	Rv1640c	Rv1583c	Rv1650	Rv2252	Rv2739c
Rv1781c	Rv1513	Rv1990c	Rv1641	Rv1584c	Rv1652	Rv2256c	Rv2742c
Rv1782	Rv1514c	Rv1992c	Rv1642	Rv1586c	Rv1653	Rv2257c	Rv2743c
Rv1784	Rv1515c	Rv1993c	Rv1643	Rv1587c	Rv1654	Rv2260	Rv2744c
Rv1785c	Rv1516c	Rv1994c	Rv1644	Rv1589	Rv1655	Rv2263	Rv2745c
Rv1788	Rv1517	Rv1995	Rv1645c	Rv1590	Rv1656	Rv2264c	Rv2748c
Rv1789	Rv1518	Rv1996	Rv1647	Rv1591	Rv1657	Rv2266	Rv2750
Rv1790	Rv1520	Rv1997	Rv1649	Rv1592c	Rv1658	Rv2282c	Rv2752c
Rv1793	Rv1521	Rv1998c	Rv1650	Rv1593c	Rv1659	Rv2284	Rv2753c
Rv1794	Rv1522c	Rv1999c	Rv1652	Rv1594	Rv1660	Rv2287	Rv2754c
Rv1795	Rv1523	Rv2000	Rv1653	Rv1595	Rv1661	Rv2290	Rv2756c
Rv1797	Rv1524	Rv2002	Rv1654	Rv1596	Rv1662	Rv2291	Rv2757c
Rv1798	Rv1525	Rv2003c	Rv1655	Rv1597	Rv1663	Rv2294	Rv2758c
Rv1800	Rv1526c	Rv2004c	Rv1656	Rv1598c	Rv1664	Rv2296	Rv2759c
Rv1802	Rv1527c	Rv2005c	Rv1657	Rv1599	Rv1665	Rv2298	Rv2761c
Rv1804c	Rv1528c	Rv2006	Rv1658	Rv1600	Rv1666c	Rv2299c	Rv2772c
Rv1807	Rv1529	Rv2008c	Rv1659	Rv1601	Rv1667c	Rv2301	Rv2773c
Rv1808	Rv1530	Rv2012	Rv1660	Rv1603	Rv1668c	Rv2313c	Rv2776c
Rv1810	Rv1531	Rv2013	Rv1661	Rv1605	Rv1670	Rv2314c	Rv2778c
Rv1811	Rv1532c	Rv2016	Rv1662	Rv1606	Rv1671	Rv2315c	Rv2779c
Rv1812c	Rv1533	Rv2017	Rv1663	Rv1608c	Rv1673c	Rv2316	Rv2780
Rv1813c	Rv1534	Rv2018	Rv1664	Rv1609	Rv1674c	Rv2317	Rv2781c
Rv1816	Rv1535	Rv2020c	Rv1665	Rv1610	Rv1675c	Rv2318	Rv2782c
Rv1817	Rv1536	Rv2021c	Rv1666c	Rv1611	Rv1676	Rv2320c	Rv2783c
Rv1819c	Rv1537	Rv2022c	Rv1667c	Rv1612	Rv1677	Rv2321c	Rv2785c
Rv1820	Rv1538c	Rv2023c	Rv1668c	Rv1613	Rv1678	Rv2322c	Rv2786c
Rv1821	Rv1539	Rv2024c	Rv1669	Rv1614	Rv1679	Rv2323c	Rv2788
Rv1822	Rv1540	Rv2027c	Rv1672c	Rv1615	Rv1680	Rv2324	Rv2790c
Rv1823	Rv1541c	Rv2029c	Rv1673c	Rv1617	Rv1681	Rv2325c	Rv2793c
Rv1825	Rv1543	Rv2030c	Rv1674c	Rv1618	Rv1682	Rv2326c	Rv2794c
Rv1826	Rv1544	Rv2031c	Rv1675c	Rv1619	Rv1683	Rv2327	Rv2797c
Rv1827	Rv1546	Rv2032	Rv1676	Rv1620c	Rv1684	Rv2330c	Rv2800
Rv1828	Rv1547	Rv2033c	Rv1678	Rv1621c	Rv1685c	Rv2332	Rv2802c
Rv1829	Rv1549	Rv2034	Rv1679	Rv1622c	Rv1686c	Rv2334	Rv2803
Rv1830	Rv1550	Rv2038c	Rv1680	Rv1623c	Rv1687c	Rv2335	Rv2807
Rv1832	Rv1551	Rv2039c	Rv1681	Rv1624c	Rv1688	Rv2343c	Rv2811
Rv1833c	Rv1552	Rv2041c	Rv1682	Rv1625c	Rv1689	Rv2344c	Rv2812
Rv1834	Rv1553	Rv2045c	Rv1683	Rv1626	Rv1691	Rv2345	Rv2813
Rv1835c	Rv1554	Rv2047c	Rv1685c	Rv1627c	Rv1692	Rv2357c	Rv2817c
Rv1836c	Rv1556	Rv2048c	Rv1687c	Rv1629	Rv1694	Rv2358	Rv2819c
Rv1838c	Rv1557	Rv2050	Rv1688	Rv1630	Rv1695	Rv2359	Rv2820c
Rv1841c	Rv1558	Rv2051c	Rv1689	Rv1631	Rv1696	Rv2360c	Rv2821c
Rv1842c	Rv1559	Rv2052c	Rv1690	Rv1632c	Rv1697	Rv2362c	Rv2823c
Rv1844c	Rv1560	Rv2053c	Rv1691	Rv1633	Rv1698	Rv2363	Rv2825c
Rv1845c	Rv1561	Rv2054	Rv1692	Rv1635c	Rv1699	Rv2364c	Rv2826c
Rv1846c	Rv1562c	Rv2056c	Rv1694	Rv1636	Rv1700	Rv2366c	Rv2827c
Rv1848	Rv1563c	Rv2057c	Rv1695	Rv1638	Rv1701	Rv2368c	Rv2828c
Rv1850	Rv1564c	Rv2058c	Rv1696	Rv1638.1	Rv1702c	Rv2372c	Rv2831
Rv1851	Rv1565c	Rv2061c	Rv1697	Rv1639c	Rv1703c	Rv2373c	Rv2832c
Rv1852	Rv1566c	Rv2062c	Rv1698	Rv1640c	Rv1704c	Rv2374c	Rv2833c
Rv1854c	Rv1569	Rv2064	Rv1699	Rv1641	Rv1706c	Rv2378c	Rv2834c
Rv1855c	Rv1570	Rv2065	Rv1700	Rv1642	Rv1707	Rv2379c	Rv2837c
Rv1856c	Rv1571	Rv2066	Rv1701	Rv1643	Rv1708	Rv2380c	Rv2838c
Rv1857	Rv1573	Rv2068c	Rv1702c	Rv1645c	Rv1710	Rv2381c	Rv2839c
Rv1858	Rv1574	Rv2069	Rv1703c	Rv1646	Rv1711	Rv2382c	Rv2840c
Rv1859	Rv1575	Rv2070c	Rv1704c	Rv1647	Rv1712	Rv2383c	Rv2841c
Rv1860	Rv1576c	Rv2071c	Rv1705c	Rv1649	Rv1713	Rv2384	Rv2842c
Rv1862	Rv1577c	Rv2072c	Rv1706c	Rv1650	Rv1714	Rv2385	Rv2844
Rv1864c	Rv1578c	Rv2073c	Rv1707	Rv1652	Rv1716	Rv2386c	Rv2845c
Rv1865c	Rv1580c	Rv2074	Rv1708	Rv1653	Rv1717	Rv2387	Rv2847c
Rv1867	Rv1581c	Rv2075c	Rv1710	Rv1654	Rv1718	Rv2388c	Rv2848c
Rv1868	Rv1582c	Rv2079	Rv1711	Rv1655	Rv1719	Rv2390c	Rv2849c
Rv1869c	Rv1583c	Rv2083	Rv1712	Rv1656	Rv1720c	Rv2391	Rv2850c
Rv1871c	Rv1584c	Rv2084	Rv1713	Rv1657	Rv1721c	Rv2392	Rv2855
Rv1872c	Rv1585c	Rv2085	Rv1714	Rv1658	Rv1722	Rv2393	Rv2857c
Rv1873	Rv1586c	Rv2086	Rv1715	Rv1659	Rv1723	Rv2398c	Rv2858c
Rv1875	Rv1587c	Rv2088	Rv1716	Rv1660	Rv1724c	Rv2399c	Rv2862c
Rv1877	Rv1588c	Rv2089c	Rv1718	Rv1661	Rv1725c	Rv2400c	Rv2865
Rv1878	Rv1589	Rv2090	Rv1719	Rv1662	Rv1726	Rv2402	Rv2867c
Rv1879	Rv1591	Rv2091c	Rv1720c	Rv1663	Rv1727	Rv2403c	Rv2868c
Rv1880c	Rv1592c	Rv2092c	Rv1722	Rv1664	Rv1729c	Rv2404c	Rv2869c
Rv1881c	Rv1593c	Rv2095c	Rv1723	Rv1665	Rv1730c	Rv2405	Rv2870c
Rv1882c	Rv1594	Rv2096c	Rv1725c	Rv1666c	Rv1731	Rv2406c	Rv2874
Rv1883c	Rv1595	Rv2097c	Rv1726	Rv1667c	Rv1732c	Rv2407	Rv2880c
Rv1884c	Rv1596	Rv2100	Rv1727	Rv1668c	Rv1733c	Rv2409c	Rv2879c
Rv1885c	Rv1597	Rv2101	Rv1729c	Rv1669	Rv1734c	Rv2410c	Rv2883c
Rv1886c	Rv1599	Rv2102	Rv1730c	Rv1670	Rv1735c	Rv2412	Rv2884
Rv1887	Rv1600	Rv2103c	Rv1731	Rv1671	Rv1736c	Rv2413c	Rv2885c
Rv1888c	Rv1601	Rv2104c	Rv1733c	Rv1672c	Rv1738	Rv2414c	Rv2888c
Rv1889c	Rv1602	Rv2105	Rv1734c	Rv1674c	Rv1739c	Rv2415c	Rv2889c
Rv1890c	Rv1603	Rv2108	Rv1736c	Rv1675c	Rv1740	Rv2416c	Rv2890c
Rv1892	Rv1604	Rv2110c	Rv1737c	Rv1676	Rv1742	Rv2417c	Rv2891
Rv1895	Rv1605	Rv2112c	Rv1738	Rv1677	Rv1743	Rv2418c	Rv2892c
Rv1896c	Rv1606	Rv2113	Rv1739c	Rv1679	Rv1744c	Rv2419c	Rv2893
Rv1897c	Rv1608c	Rv2114	Rv1742	Rv1680	Rv1746	Rv2425c	Rv2894c
Rv1898	Rv1609	Rv2115c	Rv1743	Rv1681	Rv1747	Rv2426c	Rv2897c
Rv1900c	Rv1610	Rv2116	Rv1745c	Rv1682	Rv1748	Rv2427c	Rv2900c
Rv1901	Rv1611	Rv2119	Rv1747	Rv1683	Rv1749c	Rv2428	Rv2902c
Rv1902c	Rv1612	Rv2121c	Rv1748	Rv1685c	Rv1750c	Rv2429	Rv2903c
Rv1903	Rv1613	Rv2122c	Rv1749c	Rv1687c	Rv1751	Rv2434c	Rv2910c
Rv1904	Rv1614	Rv2124c	Rv1750c	Rv1688	Rv1752	Rv2435c	Rv2911
Rv1905c	Rv1617	Rv2127	Rv1751	Rv1689	Rv1754c	Rv2436	Rv2912c
Rv1906c	Rv1618	Rv2129c	Rv1752	Rv1690	Rv1755c	Rv2438c	Rv2913c
Rv1907c	Rv1619	Rv2130c	Rv1754c	Rv1691	Rv1756c	Rv2439c	Rv2914c
Rv1908c	Rv1620c	Rv2131c	Rv1755c	Rv1692	Rv1759c	Rv2440c	Rv2916c
Rv1909c	Rv1621c	Rv2133c	Rv1756c	Rv1693	Rv1760	Rv2441c	Rv2917
Rv1912c	Rv1623c	Rv2135c	Rv1757c	Rv1694	Rv1762c	Rv2442c	Rv2918c
Rv1913	Rv1624c	Rv2138	Rv1758	Rv1695	Rv1764	Rv2444c	Rv2921c
Rv1914c	Rv1625c	Rv2140c	Rv1760	Rv1696	Rv1765c	Rv2445c	Rv2922A
Rv1915	Rv1626	Rv2141c	Rv1761c	Rv1697	Rv1774	Rv2446c	Rv2924c
Rv1916	Rv1627c	Rv2142c	Rv1762c	Rv1698	Rv1775	Rv2447c	Rv2927c
Rv1918c	Rv1628c	Rv2143	Rv1763	Rv1699	Rv1776c	Rv2448c	Rv2930
Rv1919c	Rv1629	Rv2145c	Rv1764	Rv1700	Rv1777	Rv2449c	Rv2935
Rv1920	Rv1630	Rv2147c	Rv1765c	Rv1701	Rv1779c	Rv2453c	Rv2936
Rv1921c	Rv1631	Rv2148c	Rv1766	Rv1702c	Rv1780	Rv2454c	Rv2937
Rv1922	Rv1632c	Rv2149c	Rv1767	Rv1703c	Rv1781c	Rv2455c	Rv2939
Rv1923	Rv1633	Rv2150c	Rv1769	Rv1704c	Rv1782	Rv2457c	Rv2941
Rv1924c	Rv1634	Rv2151c	Rv1770	Rv1705c	Rv1784	Rv2458	Rv2942
Rv1925	Rv1635c	Rv2152c	Rv1771	Rv1706.1	Rv1785c	Rv2460c	Rv2943
Rv1926c	Rv1636	Rv2153c	Rv1773c	Rv1706c	Rv1786	Rv2461c	Rv2944
Rv1927	Rv1637c	Rv2154c	Rv1774	Rv1707	Rv1787	Rv2462c	Rv2945c
Rv1928c	Rv1638	Rv2155c	Rv1775	Rv1708	Rv1789	Rv2463	Rv2948c
Rv1929c	Rv1638.1	Rv2158c	Rv1776c	Rv1709	Rv1790	Rv2464c	Rv2949c
Rv1930c	Rv1639c	Rv2159c	Rv1777	Rv1710	Rv1793	Rv2465c	Rv2950c
Rv1931c	Rv1640c	Rv2163c	Rv1778c	Rv1711	Rv1794	Rv2466c	Rv2951c
Rv1932	Rv1641	Rv2164c	Rv1779c	Rv1712	Rv1795	Rv2467	Rv2952
Rv1934c	Rv1642	Rv2165c	Rv1780	Rv1713	Rv1796	Rv2468c	Rv2953
Rv1935c	Rv1643	Rv2166c	Rv1781c	Rv1714	Rv1797	Rv2469c	Rv2954c
Rv1936	Rv1644	Rv2168c	Rv1782	Rv1715	Rv1798	Rv2471	Rv2955c
Rv1937	Rv1645c	Rv2170	Rv1783	Rv1716	Rv1800	Rv2474c	Rv2957
Rv1938	Rv1646	Rv2172c	Rv1784	Rv1717	Rv1802	Rv2475c	Rv2960c
Rv1940	Rv1647	Rv2173	Rv1785c	Rv1718	Rv1805c	Rv2476c	Rv2962c
Rv1941	Rv1649	Rv2175c	Rv1787	Rv1719	Rv1808	Rv2477c	Rv2966c
Rv1942c	Rv1650	Rv2176	Rv1790	Rv1720c	Rv1810	Rv2478c	Rv2967c
Rv1943c	Rv1652	Rv2178c	Rv1794	Rv1721c	Rv1812c	Rv2483c	Rv2969c
Rv1946c	Rv1653	Rv2181	Rv1795	Rv1722	Rv1813c	Rv2484c	Rv2970c
Rv1947	Rv1654	Rv2182c	Rv1796	Rv1723	Rv1814	Rv2485c	Rv2971
Rv1948c	Rv1655	Rv2183c	Rv1797	Rv1724c	Rv1816	Rv2495c	Rv2973c
Rv1949c	Rv1657	Rv2184c	Rv1798	Rv1725c	Rv1817	Rv2496c	Rv2974c
Rv1953	Rv1658	Rv2187	Rv1802	Rv1726	Rv1819c	Rv2497c	Rv2977c
Rv1955	Rv1659	Rv2188c	Rv1803c	Rv1727	Rv1820	Rv2498c	Rv2978c
Rv1956	Rv1660	Rv2189c	Rv1804c	Rv1728c	Rv1821	Rv2499c	Rv2979c
Rv1957	Rv1661	Rv2190c	Rv1805c	Rv1729c	Rv1823	Rv2500c	Rv2982c
Rv1959c	Rv1662	Rv2191	Rv1811	Rv1730c	Rv1824	Rv2501c	Rv2985
Rv1960c	Rv1663	Rv2195	Rv1812c	Rv1731	Rv1825	Rv2502c	Rv2986c
Rv1961	Rv1664	Rv2196	Rv1813c	Rv1732c	Rv1827	Rv2503c	Rv2988c
Rv1962c	Rv1665	Rv2197c	Rv1814	Rv1733c	Rv1828	Rv2505c	Rv2989
Rv1963c	Rv1666c	Rv2200c	Rv1816	Rv1735c	Rv1830	Rv2506	Rv2990c
Rv1965	Rv1667c	Rv2201	Rv1817	Rv1736c	Rv1832	Rv2507	Rv2991
Rv1966	Rv1668c	Rv2202c	Rv1819c	Rv1738	Rv1833c	Rv2508c	Rv2992c
Rv1967	Rv1669	Rv2205c	Rv1820	Rv1739c	Rv1834	Rv2509	Rv2993c
Rv1968	Rv1671	Rv2207	Rv1821	Rv1740	Rv1835c	Rv2510c	Rv2994
Rv1969	Rv1672c	Rv2209	Rv1822	Rv1741	Rv1836c	Rv2511	Rv2996c
Rv1970	Rv1673c	Rv2212	Rv1823	Rv1742	Rv1837c	Rv2518c	Rv2997
Rv1972	Rv1674c	Rv2213	Rv1825	Rv1743	Rv1839c	Rv2521	Rv3000
Rv1973	Rv1675c	Rv2214c	Rv1828	Rv1744c	Rv1841c	Rv2522c	Rv3001c
Rv1974	Rv1676	Rv2215	Rv1830	Rv1745c	Rv1842c	Rv2524c	Rv3002c
Rv1975	Rv1678	Rv2216	Rv1832	Rv1746	Rv1843c	Rv2525c	Rv3003c
Rv1976c	Rv1679	Rv2217	Rv1833c	Rv1747	Rv1844c	Rv2531c	Rv3009c
Rv1977	Rv1680	Rv2218	Rv1834	Rv1748	Rv1846c	Rv2533c	Rv3010c
Rv1978	Rv1681	Rv2219	Rv1835c	Rv1749c	Rv1848	Rv2534c	Rv3014c
Rv1980c	Rv1682	Rv2219.1	Rv1836c	Rv1750c	Rv1849	Rv2535c	Rv3024c
Rv1985c	Rv1683	Rv2220	Rv1837c	Rv1751	Rv1850	Rv2536	Rv3026c
Rv1986	Rv1684	Rv2221c	Rv1839c	Rv1752	Rv1851	Rv2538c	Rv3027c
Rv1988	Rv1685c	Rv2222c	Rv1841c	Rv1754c	Rv1852	Rv2539c	Rv3028c
Rv1989c	Rv1686c	Rv2224c	Rv1842c	Rv1755c	Rv1853	Rv2540c	Rv3030
Rv1990c	Rv1687c	Rv2225	Rv1843c	Rv1756c	Rv1854c	Rv2552c	Rv3033
Rv1990.1	Rv1688	Rv2226	Rv1844c	Rv1760	Rv1855c	Rv2553c	Rv3035
Rv1991c	Rv1689	Rv2227	Rv1846c	Rv1762c	Rv1856c	Rv2554c	Rv3037c
Rv1992c	Rv1690	Rv2228c	Rv1848	Rv1764	Rv1858	Rv2555c	Rv3038c
Rv1993c	Rv1691	Rv2229c	Rv1849	Rv1765.1	Rv1859	Rv2556c	Rv3039c
Rv1994c	Rv1692	Rv2230c	Rv1850	Rv1765c	Rv1860	Rv2558	Rv3042c
Rv1995	Rv1693	Rv2231c	Rv1851	Rv1766	Rv1862	Rv2559c	Rv3044
Rv1996	Rv1694	Rv2234	Rv1852	Rv1767	Rv1864c	Rv2564	Rv3045
Rv1997	Rv1695	Rv2235	Rv1854c	Rv1769	Rv1865c	Rv2567	Rv3048c
Rv1998c	Rv1696	Rv2236c	Rv1855c	Rv1770	Rv1866	Rv2568c	Rv3049c
Rv1999c	Rv1697	Rv2238c	Rv1856c	Rv1771	Rv1867	Rv2569c	Rv3050c
Rv2000	Rv1698	Rv2240c	Rv1857	Rv1773c	Rv1868	Rv2570	Rv3052c
Rv2001	Rv1699	Rv2241	Rv1859	Rv1774	Rv1869c	Rv2571c	Rv3056
Rv2002	Rv1700	Rv2242	Rv1862	Rv1775	Rv1870c	Rv2572c	Rv3059
Rv2003c	Rv1701	Rv2244	Rv1863c	Rv1776c	Rv1871c	Rv2573	Rv3060c
Rv2004c	Rv1702c	Rv2246	Rv1864c	Rv1777	Rv1872c	Rv2574	Rv3061c
Rv2005c	Rv1703c	Rv2247	Rv1865c	Rv1778c	Rv1876	Rv2575	Rv3062
Rv2006	Rv1704c	Rv2248	Rv1866	Rv1779c	Rv1877	Rv2577	Rv3066
Rv2008c	Rv1706c	Rv2249c	Rv1867	Rv1780	Rv1879	Rv2578c	Rv3071
Rv2010	Rv1707	Rv2250c	Rv1868	Rv1781c	Rv1880c	Rv2580c	Rv3072c
Rv2011c	Rv1708	Rv2251	Rv1869c	Rv1782	Rv1882c	Rv2581c	Rv3074
Rv2012	Rv1710	Rv2252	Rv1870c	Rv1783	Rv1884c	Rv2582	Rv3076
Rv2013	Rv1711	Rv2253	Rv1871c	Rv1785c	Rv1885c	Rv2583c	Rv3077
Rv2014	Rv1712	Rv2256c	Rv1872c	Rv1787	Rv1887	Rv2585c	Rv3079c
Rv2017	Rv1713	Rv2258c	Rv1875	Rv1790	Rv1888.1	Rv2586c	Rv3080c
Rv2018	Rv1714	Rv2259	Rv1876	Rv1794	Rv1889c	Rv2587c	Rv3081
Rv2021c	Rv1715	Rv2260	Rv1877	Rv1796	Rv1890c	Rv2588c	Rv3083
Rv2022c	Rv1716	Rv2263	Rv1879	Rv1797	Rv1891	Rv2589	Rv3084
Rv2023c	Rv1717	Rv2265	Rv1880c	Rv1798	Rv1892	Rv2590	Rv3088
Rv2025c	Rv1718	Rv2266	Rv1882c	Rv1800	Rv1894c	Rv2592c	Rv3089
Rv2026c	Rv1719	Rv2268c	Rv1883c	Rv1802	Rv1895	Rv2593c	Rv3091
Rv2027c	Rv1721c	Rv2269c	Rv1884c	Rv1803c	Rv1896c	Rv2594c	Rv3094c
Rv2028c	Rv1722	Rv2275	Rv1885c	Rv1804c	Rv1897c	Rv2597	Rv3095
Rv2029c	Rv1723	Rv2276	Rv1888.1	Rv1805c	Rv1898	Rv2601	Rv3101c
Rv2030c	Rv1724c	Rv2277c	Rv1888c	Rv1808	Rv1899c	Rv2603c	Rv3102c
Rv2032	Rv1725c	Rv2278	Rv1889c	Rv1810	Rv1900c	Rv2604c	Rv3105c
Rv2033c	Rv1726	Rv2281	Rv1890c	Rv1811	Rv1901	Rv2605c	Rv3106
Rv2034	Rv1728c	Rv2282c	Rv1891	Rv1812c	Rv1902c	Rv2606c	Rv3109
Rv2035	Rv1729c	Rv2284	Rv1892	Rv1813c	Rv1904	Rv2607	Rv3111
Rv2036	Rv1730c	Rv2285	Rv1893	Rv1814	Rv1905c	Rv2609c	Rv3116
Rv2038c	Rv1731	Rv2286c	Rv1894c	Rv1815	Rv1906c	Rv2610c	Rv3119
Rv2039c	Rv1733c	Rv2287	Rv1895	Rv1816	Rv1907c	Rv2611c	Rv3125c
Rv2040c	Rv1735c	Rv2289	Rv1896c	Rv1817	Rv1908c	Rv2612c	Rv3126c
Rv2041c	Rv1736c	Rv2290	Rv1898	Rv1819c	Rv1909c	Rv2613c	Rv3127
Rv2042c	Rv1737c	Rv2291	Rv1899c	Rv1820	Rv1910c	Rv2614c	Rv3131
Rv2043c	Rv1738	Rv2294	Rv1900c	Rv1821	Rv1912c	Rv2616	Rv3132c
Rv2045c	Rv1739c	Rv2295	Rv1901	Rv1822	Rv1914c	Rv2619c	Rv3133c
Rv2046	Rv1741	Rv2296	Rv1903	Rv1823	Rv1915	Rv2620c	Rv3138
Rv2047c	Rv1742	Rv2297	Rv1904	Rv1824	Rv1916	Rv2621c	Rv3139
Rv2050	Rv1743	Rv2298	Rv1906c	Rv1825	Rv1919c	Rv2622	Rv3140
Rv2051c	Rv1744c	Rv2299c	Rv1908c	Rv1826	Rv1920	Rv2627c	Rv3143
Rv2052c	Rv1745c	Rv2300c	Rv1909c	Rv1827	Rv1921c	Rv2629	Rv3146
Rv2054	Rv1746	Rv2302	Rv1910c	Rv1828	Rv1922	Rv2633c	Rv3147
Rv2056c	Rv1747	Rv2303c	Rv1912c	Rv1829	Rv1923	Rv2637	Rv3148
Rv2058c	Rv1748	Rv2305	Rv1913	Rv1830	Rv1924c	Rv2640c	Rv3150
Rv2059	Rv1750c	Rv2306.2	Rv1914c	Rv1831	Rv1925	Rv2641	Rv3151
Rv2061c	Rv1751	Rv2307.2	Rv1915	Rv1832	Rv1926c	Rv2643	Rv3158
Rv2062c	Rv1752	Rv2307c	Rv1916	Rv1833c	Rv1927	Rv2646	Rv3160c
Rv2064	Rv1754c	Rv2308	Rv1918c	Rv1834	Rv1928c	Rv2659c	Rv3161c
Rv2065	Rv1755c	Rv2309c	Rv1919c	Rv1835c	Rv1929c	Rv2667	Rv3163c
Rv2066	Rv1756c	Rv2310	Rv1920	Rv1836c	Rv1930c	Rv2668	Rv3164c
Rv2067c	Rv1757c	Rv2311	Rv1922	Rv1837c	Rv1931c	Rv2669	Rv3165c
Rv2068c	Rv1759c	Rv2312	Rv1923	Rv1839c	Rv1933c	Rv2670c	Rv3166c
Rv2070c	Rv1760	Rv2313c	Rv1924c	Rv1841c	Rv1934c	Rv2671	Rv3168
Rv2071c	Rv1762c	Rv2314c	Rv1925	Rv1842c	Rv1935c	Rv2672	Rv3170
Rv2073c	Rv1763	Rv2315c	Rv1927	Rv1843c	Rv1936	Rv2673	Rv3171c
Rv2074	Rv1764	Rv2318	Rv1928c	Rv1844c	Rv1937	Rv2676c	Rv3173c
Rv2075c	Rv1765c	Rv2320c	Rv1929c	Rv1845c	Rv1938	Rv2678c	Rv3174
Rv2077c	Rv1766	Rv2321c	Rv1930c	Rv1846c	Rv1940	Rv2680	Rv3175
Rv2080	Rv1767	Rv2324	Rv1931c	Rv1847	Rv1942c	Rv2681	Rv3176c
Rv2084	Rv1769	Rv2325c	Rv1932	Rv1849	Rv1943c	Rv2682c	Rv3177
Rv2086	Rv1770	Rv2326c	Rv1933c	Rv1850	Rv1944c	Rv2690c	Rv3183
Rv2088	Rv1771	Rv2327	Rv1934c	Rv1851	Rv1946c	Rv2691	Rv3193c
Rv2089c	Rv1772	Rv2328	Rv1935c	Rv1852	Rv1947	Rv2692	Rv3194c
Rv2091c	Rv1773c	Rv2329c	Rv1937	Rv1853	Rv1949c	Rv2694c	Rv3196
Rv2092c	Rv1774	Rv2330c	Rv1938	Rv1854c	Rv1952	Rv2696c	Rv3197
Rv2093c	Rv1775	Rv2331	Rv1939	Rv1855c	Rv1953	Rv2697c	Rv3198c
Rv2095c	Rv1776c	Rv2331.1	Rv1940	Rv1856c	Rv1954c	Rv2700	Rv3200c
Rv2096c	Rv1777	Rv2332	Rv1941	Rv1857	Rv1955	Rv2701c	Rv3201c
Rv2100	Rv1778c	Rv2334	Rv1942c	Rv1858	Rv1956	Rv2703	Rv3202c
Rv2102	Rv1779c	Rv2335	Rv1943c	Rv1859	Rv1957	Rv2704	Rv3205c
Rv2104c	Rv1780	Rv2336	Rv1945	Rv1860	Rv1958c	Rv2705c	Rv3206c
Rv2113	Rv1781c	Rv2337c	Rv1947	Rv1861	Rv1960c	Rv2707	Rv3210c
Rv2114	Rv1782	Rv2338c	Rv1949c	Rv1862	Rv1961	Rv2708c	Rv3211
Rv2116	Rv1783	Rv2339	Rv1953	Rv1864c	Rv1962c	Rv2709	Rv3212
Rv2117	Rv1784	Rv2340c	Rv1954c	Rv1865c	Rv1963c	Rv2710	Rv3213c
Rv2118c	Rv1785c	Rv2341	Rv1955	Rv1866	Rv1988	Rv2711	Rv3215
Rv2119	Rv1786	Rv2343c	Rv1956	Rv1867	Rv1989c	Rv2712c	Rv3218
Rv2121c	Rv1787	Rv2344c	Rv1958c	Rv1868	Rv1990c	Rv2713	Rv3221.1
Rv2124c	Rv1789	Rv2345	Rv1959c	Rv1869c	Rv1991c	Rv2715	Rv3224
Rv2125	Rv1790	Rv2346c	Rv1961	Rv1870c	Rv1992c	Rv2718c	Rv3225c
Rv2127	Rv1793	Rv2347c	Rv1963c	Rv1871c	Rv1993c	Rv2719c	Rv3226c
Rv2129c	Rv1794	Rv2349c	Rv1964	Rv1872c	Rv1994c	Rv2720	Rv3227
Rv2131c	Rv1795	Rv2350c	Rv1966	Rv1873	Rv1995	Rv2721c	Rv3228
Rv2133c	Rv1796	Rv2351c	Rv1967	Rv1875	Rv1997	Rv2722	Rv3229c
Rv2134c	Rv1797	Rv2353c	Rv1968	Rv1877	Rv1998c	Rv2724c	Rv3230c
Rv2135c	Rv1798	Rv2354	Rv1969	Rv1878	Rv1999c	Rv2725c	Rv3232c
Rv2136c	Rv1800	Rv2356c	Rv1970	Rv1879	Rv2000	Rv2726c	Rv3235
Rv2137c	Rv1802	Rv2357c	Rv1971	Rv1880c	Rv2001	Rv2727c	Rv3236c
Rv2138	Rv1805c	Rv2358	Rv1972	Rv1881c	Rv2002	Rv2729c	Rv3237c
Rv2139	Rv1808	Rv2360c	Rv1974	Rv1882c	Rv2003c	Rv2731	Rv3728
Rv2140c	Rv1809	Rv2361c	Rv1976c	Rv1884c	Rv2004c	Rv2733c	Rv3240c
Rv2142c	Rv1810	Rv2362c	Rv1977	Rv1885c	Rv2005c	Rv2736c	Rv3242c
Rv2143	Rv1811	Rv2363	Rv1978	Rv1887	Rv2006	Rv2737.1	Rv3244c
Rv2145c	Rv1812c	Rv2365c	Rv1979c	Rv1888c	Rv2008c	Rv2737c	Rv3245c
Rv2148c	Rv1813c	Rv2366c	Rv1981c	Rv1889c	Rv2009	Rv2739c	Rv3247c
Rv2149c	Rv1816	Rv2368c	Rv1985c	Rv1890c	Rv2010	Rv2740	Rv3248c
Rv2150c	Rv1817	Rv2370c	Rv1987	Rv1891	Rv2011c	Rv2743c	Rv3249c
Rv2151c	Rv1819c	Rv2371	Rv1988	Rv1893	Rv2012	Rv2744c	Rv3252c
Rv2152c	Rv1820	Rv2373c	Rv1989c	Rv1894c	Rv2013	Rv2746c	Rv3254
Rv2154c	Rv1821	Rv2374c	Rv1990.1	Rv1895	Rv2014	Rv2747	Rv3255c
Rv2155c	Rv1822	Rv2375	Rv1990c	Rv1896c	Rv2016	Rv2748c	Rv3256c
Rv2157c	Rv1823	Rv2379c	Rv1991c	Rv1898	Rv2017	Rv2749	Rv3257c
Rv2158c	Rv1824	Rv2380c	Rv1992c	Rv1899c	Rv2018	Rv2750	Rv3259
Rv2159c	Rv1825	Rv2381c	Rv1993c	Rv1900c	Rv2019	Rv2751	Rv3261
Rv2160.1	Rv1827	Rv2382c	Rv1994c	Rv1901	Rv2020c	Rv2752c	Rv3262
Rv2161c	Rv1829	Rv2383c	Rv1995	Rv1902c	Rv2021c	Rv2753c	Rv3263
Rv2163c	Rv1830	Rv2384	Rv1996	Rv1903	Rv2022c	Rv2754c	Rv3264c
Rv2164c	Rv1831	Rv2385	Rv1997	Rv1905c	Rv2023c	Rv2756c	Rv3265c
Rv2165c	Rv1832	Rv2386c	Rv1998c	Rv1906c	Rv2024c	Rv2764c	Rv3267
Rv2166c	Rv1833c	Rv2387	Rv1999c	Rv1907c	Rv2026c	Rv2765	Rv3269
Rv2169c	Rv1834	Rv2388c	Rv2000	Rv1908c	Rv2027c	Rv2766c	Rv3270
Rv2170	Rv1835c	Rv2389c	Rv2001	Rv1909c	Rv2029c	Rv2769c	Rv3272
Rv2171	Rv1836c	Rv2390c	Rv2002	Rv1910c	Rv2030c	Rv2771c	Rv3273
Rv2172c	Rv1837c	Rv2391	Rv2004c	Rv1911c	Rv2031c	Rv2772c	Rv3274c
Rv2173	Rv1838c	Rv2393	Rv2005c	Rv1912c	Rv2032	Rv2773c	Rv3275c
Rv2174	Rv1839c	Rv2396	Rv2006	Rv1913	Rv2033c	Rv2776c	Rv3276c
Rv2175c	Rv1841c	Rv2397c	Rv2008c	Rv1914c	Rv2034	Rv2777c	Rv3279c
Rv2178c	Rv1842c	Rv2399c	Rv2009	Rv1915	Rv2035	Rv2778c	Rv3280
Rv2179c	Rv1843c	Rv2401	Rv2011c	Rv1916	Rv2036	Rv2780	Rv3282
Rv2180c	Rv1844c	Rv2402	Rv2012	Rv1917c	Rv2037c	Rv2782c	Rv3283
Rv2181	Rv1845c	Rv2403c	Rv2014	Rv1919c	Rv2038c	Rv2783c	Rv3285
Rv2182c	Rv1846c	Rv2404c	Rv2015c	Rv1920	Rv2041c	Rv2785c	Rv3286c
Rv2183c	Rv1847	Rv2405	Rv2016	Rv1921c	Rv2042c	Rv2788	Rv3290c
Rv2184c	Rv1848	Rv2406c	Rv2017	Rv1922	Rv2043c	Rv2789c	Rv3291c
Rv2185c	Rv1850	Rv2407	Rv2018	Rv1923	Rv2045c	Rv2790c	Rv3292
Rv2187	Rv1851	Rv2408	Rv2019	Rv1924c	Rv2047c	Rv2793c	Rv3293
Rv2188c	Rv1852	Rv2409c	Rv2021c	Rv1925	Rv2048c	Rv2794c	Rv3294c
Rv2189c	Rv1853	Rv2410c	Rv2022c	Rv1926c	Rv2049c	Rv2795c	Rv3295
Rv2191	Rv1854c	Rv2411c	Rv2023c	Rv1927	Rv2050	Rv2799	Rv3296
Rv2192c	Rv1855c	Rv2412	Rv2024c	Rv1928c	Rv2051c	Rv2800	Rv3299c
Rv2193	Rv1856c	Rv2413c	Rv2026c	Rv1929c	Rv2052c	Rv2825c	Rv3300c
Rv2194	Rv1857	Rv2414c	Rv2027c	Rv1930c	Rv2053c	Rv2828c	Rv3303c
Rv2195	Rv1858	Rv2415c	Rv2028c	Rv1931c	Rv2054	Rv2831	Rv3306c
Rv2196	Rv1859	Rv2416c	Rv2029c	Rv1933c	Rv2055c	Rv2838c	Rv3308
Rv2198c	Rv1860	Rv2417c	Rv2030c	Rv1934c	Rv2056c	Rv2839c	Rv3311
Rv2200c	Rv1861	Rv2420c	Rv2031c	Rv1935c	Rv2057c	Rv2841c	Rv3312c
Rv2201	Rv1862	Rv2421c	Rv2032	Rv1936	Rv2058c	Rv2844	Rv3313c
Rv2202c	Rv1863c	Rv2423	Rv2033c	Rv1937	Rv2059	Rv2845c	Rv3314c
Rv2203	Rv1864c	Rv2424c	Rv2034	Rv1938	Rv2061c	Rv2846c	Rv3318
Rv2204c	Rv1865c	Rv2425c	Rv2035	Rv1939	Rv2062c	Rv2847c	Rv3319
Rv2206	Rv1866	Rv2426c	Rv2037c	Rv1940	Rv2063	Rv2848c	Rv3324c
Rv2207	Rv1867	Rv2427c	Rv2038c	Rv1941	Rv2064	Rv2849c	Rv3329
Rv2209	Rv1868	Rv2430c	Rv2040c	Rv1942c	Rv2065	Rv2850c	Rv3332
Rv2210c	Rv1869c	Rv2432c	Rv2041c	Rv1945	Rv2066	Rv2851c	Rv3333c
Rv2211c	Rv1870c	Rv2435c	Rv2042c	Rv1947	Rv2067c	Rv2852c	Rv3334
Rv2212	Rv1871c	Rv2438c	Rv2043c	Rv1948c	Rv2068c	Rv2854	Rv3339c
Rv2213	Rv1872c	Rv2439c	Rv2045c	Rv1949c	Rv2069	Rv2855	Rv3341
Rv2214c	Rv1873	Rv2440c	Rv2046	Rv1952	Rv2070c	Rv2857c	Rv3342
Rv2215	Rv1874	Rv2441c	Rv2047c	Rv1953	Rv2071c	Rv2860c	Rv3357
Rv2216	Rv1875	Rv2444c	Rv2048c	Rv1954c	Rv2077c	Rv2861c	Rv3360
Rv2217	Rv1876	Rv2445c	Rv2050	Rv1955	Rv2079	Rv2864c	Rv3361c
Rv2218	Rv1877	Rv2447c	Rv2051c	Rv1956	Rv2081c	Rv2867c	Rv3362c
Rv2219	Rv1878	Rv2448c	Rv2052c	Rv1957	Rv2082	Rv2868c	Rv3370c
Rv2219.1	Rv1879	Rv2449c	Rv2054	Rv1958c	Rv2083	Rv2869c	Rv3371
Rv2220	Rv1880c	Rv2450c	Rv2055c	Rv1959c	Rv2084	Rv2870c	Rv3372
Rv2221c	Rv1881c	Rv2453c	Rv2056c	Rv1960c	Rv2085	Rv2874	Rv3373
Rv2222c	Rv1882c	Rv2454c	Rv2059	Rv1961	Rv2086	Rv2877c	Rv3374
Rv2223c	Rv1883c	Rv2455c	Rv2062c	Rv1962c	Rv2088	Rv2878c	Rv3376
Rv2224c	Rv1885c	Rv2456c	Rv2063	Rv1963c	Rv2089c	Rv2881c	Rv3377c
Rv2228c	Rv1886c	Rv2457c	Rv2064	Rv1964	Rv2090	Rv2882c	Rv3384c
Rv2229c	Rv1887	Rv2461c	Rv2065	Rv1978	Rv2091c	Rv2883c	Rv3385c
Rv2230c	Rv1888.1	Rv2462c	Rv2066	Rv1979c	Rv2092c	Rv2884	Rv3386
Rv2231c	Rv1888c	Rv2463	Rv2067c	Rv1980c	Rv2093c	Rv2887	Rv3389c
Rv2232	Rv1889c	Rv2466c	Rv2068c	Rv1981c	Rv2096c	Rv2888c	Rv3391
Rv2234	Rv1890c	Rv2467	Rv2069	Rv1984c	Rv2097c	Rv2889c	Rv3393
Rv2235	Rv1893	Rv2468c	Rv2070c	Rv1985c	Rv2100	Rv2890c	Rv3394c
Rv2238c	Rv1894c	Rv2469c	Rv2071c	Rv1986	Rv2101	Rv2894c	Rv3395c
Rv2240c	Rv1895	Rv2470	Rv2072c	Rv1987	Rv2102	Rv2895c	Rv3396c
Rv2241	Rv1896c	Rv2471	Rv2073c	Rv1988	Rv2103c	Rv2896c	Rv3397c
Rv2242	Rv1897c	Rv2473	Rv2074	Rv1989c	Rv2104c	Rv2897c	Rv3398c
Rv2243	Rv1898	Rv2476c	Rv2075c	Rv1990.1	Rv2106	Rv2899c	Rv3400
Rv2244	Rv1899c	Rv2477c	Rv2077c	Rv1992c	Rv2108	Rv2901c	Rv3401
Rv2245	Rv1900c	Rv2478c	Rv2079	Rv1993c	Rv2110c	Rv2902c	Rv3403c
Rv2246	Rv1901	Rv2480c	Rv2082	Rv1995	Rv2112c	Rv2903c	Rv3405c
Rv2247	Rv1902c	Rv2481c	Rv2083	Rv1996	Rv2113	Rv2905	Rv3406
Rv2249c	Rv1903	Rv2482c	Rv2084	Rv1997	Rv2114	Rv2906c	Rv3408
Rv2251	Rv1904	Rv2483c	Rv2085	Rv1999c	Rv2115c	Rv2907c	Rv3409c
Rv2252	Rv1905c	Rv2484c	Rv2086	Rv2000	Rv2117	Rv2908c	Rv3410c
Rv2253	Rv1906c	Rv2485c	Rv2088	Rv2001	Rv2118c	Rv2909c	Rv3411c
Rv2256c	Rv1907c	Rv2486	Rv2089c	Rv2002	Rv2119	Rv2911	Rv3413c
Rv2257c	Rv1908c	Rv2488c	Rv2090	Rv2004c	Rv2121c	Rv2912c	Rv3417c
Rv2258c	Rv1909c	Rv2490c	Rv2091c	Rv2005c	Rv2122c	Rv2913c	Rv3420c
Rv2259	Rv1910c	Rv2491	Rv2092c	Rv2006	Rv2123	Rv2915c	Rv3423c
Rv2263	Rv1912c	Rv2493	Rv2093c	Rv2008c	Rv2124c	Rv2916c	Rv3430c
Rv2265	Rv1913	Rv2495c	Rv2095c	Rv2009	Rv2125	Rv2917	Rv3432c
Rv2266	Rv1915	Rv2496c	Rv2096c	Rv2010	Rv2127	Rv2918c	Rv3433c
Rv2267c	Rv1916	Rv2497c	Rv2097c	Rv2011c	Rv2128	Rv2919c	Rv3436c
Rv2268c	Rv1919c	Rv2499c	Rv2100	Rv2012	Rv2129c	Rv2920c	Rv3438
Rv2270	Rv1920	Rv2500c	Rv2101	Rv2013	Rv2130c	Rv2921c	Rv3441c
Rv2271	Rv1921c	Rv2501c	Rv2102	Rv2014	Rv2133c	Rv2922A	Rv3442c
Rv2273	Rv1922	Rv2502c	Rv2104c	Rv2016	Rv2134c	Rv2922c	Rv3443c
Rv2275	Rv1923	Rv2503c	Rv2105	Rv2017	Rv2135c	Rv2923c	Rv3446c
Rv2276	Rv1924c	Rv2505c	Rv2106	Rv2018	Rv2137c	Rv2924c	Rv3448
Rv2280	Rv1925	Rv2506	Rv2108	Rv2019	Rv2139	Rv2925c	Rv3450c
Rv2281	Rv1926c	Rv2510c	Rv2109c	Rv2020c	Rv2141c	Rv2926c	Rv3455c
Rv2282c	Rv1927	Rv2511	Rv2110c	Rv2021c	Rv2142c	Rv2927c	Rv3456c
Rv2284	Rv1928c	Rv2513	Rv2112c	Rv2022c	Rv2143	Rv2928	Rv3457c
Rv2285	Rv1929c	Rv2515c	Rv2113	Rv2023c	Rv2145c	Rv2935	Rv3458c
Rv2286c	Rv1930c	Rv2516c	Rv2114	Rv2024c	Rv2147c	Rv2936	Rv3460c
Rv2287	Rv1931c	Rv2520c	Rv2115c	Rv2026c	Rv2148c	Rv2938	Rv3463
Rv2288	Rv1933c	Rv2521	Rv2116	Rv2027c	Rv2149c	Rv2951c	Rv3464
Rv2290	Rv1934c	Rv2522c	Rv2117	Rv2028c	Rv2150c	Rv2955c	Rv3466
Rv2293c	Rv1936	Rv2523c	Rv2118c	Rv2029c	Rv2152c	Rv2957	Rv3468c
Rv2294	Rv1937	Rv2524c	Rv2119	Rv2030c	Rv2153c	Rv2963	Rv3470c
Rv2295	Rv1938	Rv2525c	Rv2121c	Rv2031c	Rv2154c	Rv2965c	Rv3472
Rv2296	Rv1940	Rv2528c	Rv2122c	Rv2032	Rv2155c	Rv2966c	Rv3480c
Rv2297	Rv1941	Rv2529	Rv2123	Rv2033c	Rv2157c	Rv2967c	Rv3487c
Rv2298	Rv1942c	Rv2530A	Rv2124c	Rv2034	Rv2158c	Rv2969c	Rv3490
Rv2299c	Rv1943c	Rv2530c	Rv2126c	Rv2035	Rv2159c	Rv2973c	Rv3493c
Rv2300c	Rv1945	Rv2531c	Rv2127	Rv2036	Rv2160.1	Rv2974c	Rv3494c
Rv2302	Rv1946c	Rv2532c	Rv2130c	Rv2037c	Rv2161c	Rv2975c	Rv3495c
Rv2303c	Rv1947	Rv2534c	Rv2134c	Rv2038c	Rv2163c	Rv2976c	Rv3496c
Rv2305	Rv1948c	Rv2535c	Rv2135c	Rv2039c	Rv2164c	Rv2977c	Rv3497c
Rv2306c	Rv1949c	Rv2536	Rv2137c	Rv2040c	Rv2165c	Rv2981c	Rv3499c
Rv2307c	Rv1954c	Rv2537c	Rv2138	Rv2041c	Rv2166c	Rv2984	Rv3501c
Rv2307.2	Rv1955	Rv2538c	Rv2139	Rv2042c	Rv2167c	Rv2985	Rv3502c
Rv2308	Rv1956	Rv2540c	Rv2140c	Rv2044c	Rv2169c	Rv2986c	Rv3505
Rv2309c	Rv1957	Rv2541	Rv2141c	Rv2045c	Rv2170	Rv2987c	Rv3506
Rv2310	Rv1958c	Rv2542	Rv2142c	Rv2046	Rv2171	Rv2988c	Rv3510c
Rv2311	Rv1959c	Rv2543	Rv2143	Rv2047c	Rv2172c	Rv2989	Rv3515c
Rv2313c	Rv1960c	Rv2544	Rv2145c	Rv2048c	Rv2173	Rv2991	Rv3516
Rv2314c	Rv1961	Rv2545	Rv2147c	Rv2049c	Rv2174	Rv2994	Rv3517
Rv2315c	Rv1962c	Rv2546	Rv2148c	Rv2050	Rv2175c	Rv2995c	Rv3519
Rv2317	Rv1963c	Rv2547	Rv2149c	Rv2051c	Rv2176	Rv2996c	Rv3521
Rv2318	Rv1964	Rv2553c	Rv2150c	Rv2052c	Rv2177c	Rv2997	Rv3523
Rv2319c	Rv1966	Rv2555c	Rv2151c	Rv2053c	Rv2178c	Rv3001c	Rv3526
Rv2320c	Rv1967	Rv2557	Rv2152c	Rv2054	Rv2180c	Rv3003c	Rv3528c
Rv2323c	Rv1968	Rv2559c	Rv2153c	Rv2055c	Rv2181	Rv3004	Rv3529c
Rv2324	Rv1969	Rv2563	Rv2154c	Rv2056c	Rv2182c	Rv3006	Rv3532
Rv2325c	Rv1970	Rv2564	Rv2155c	Rv2058c	Rv2183c	Rv3007c	Rv3534c
Rv2326c	Rv1971	Rv2565	Rv2156c	Rv2059	Rv2184c	Rv3009c	Rv3535c
Rv2327	Rv1972	Rv2566	Rv2157c	Rv2062c	Rv2186c	Rv3010c	Rv3536c
Rv2328	Rv1973	Rv2567	Rv2158c	Rv2063	Rv2187	Rv3011c	Rv3537
Rv2329c	Rv1974	Rv2568c	Rv2159c	Rv2064	Rv2188c	Rv3012c	Rv3538
Rv2331	Rv1975	Rv2569c	Rv2160.1	Rv2065	Rv2189c	Rv3013	Rv3542c
Rv2331.1	Rv1976c	Rv2570	Rv2160c	Rv2066	Rv2190c	Rv3014c	Rv3543c
Rv2332	Rv1977	Rv2571c	Rv2161c	Rv2067c	Rv2191	Rv3015c	Rv3545c
Rv2333c	Rv1978	Rv2572c	Rv2162c	Rv2068c	Rv2192c	Rv3024c	Rv3546
Rv2334	Rv1979c	Rv2573	Rv2163c	Rv2069	Rv2193	Rv3025c	Rv3549c
Rv2335	Rv1980c	Rv2577	Rv2164c	Rv2070c	Rv2194	Rv3026c	Rv3550
Rv2336	Rv1981c	Rv2578c	Rv2165c	Rv2071c	Rv2195	Rv3027c	Rv3551
Rv2337c	Rv1982c	Rv2579	Rv2166c	Rv2075c	Rv2196	Rv3028c	Rv3552
Rv2338c	Rv1984c	Rv2580c	Rv2167c	Rv2077c	Rv2197c	Rv3029c	Rv3553
Rv2339	Rv1985c	Rv2581c	Rv2168c	Rv2079	Rv2198c	Rv3030	Rv3554
Rv2340c	Rv1986	Rv2583c	Rv2169c	Rv2080	Rv2200c	Rv3031	Rv3555c
Rv2343c	Rv1988	Rv2584c	Rv2170	Rv2082	Rv2201	Rv3032	Rv3556c
Rv2344c	Rv1989c	Rv2585c	Rv2171	Rv2083	Rv2202c	Rv3034c	Rv3557c
Rv2345	Rv1990.1	Rv2586c	Rv2172c	Rv2084	Rv2204c	Rv3035	Rv3559c
Rv2346c	Rv1991c	Rv2587c	Rv2173	Rv2085	Rv2205c	Rv3036c	Rv3560c
Rv2347c	Rv1992c	Rv2589	Rv2174	Rv2086	Rv2206	Rv3037c	Rv3561
Rv2350c	Rv1993c	Rv2590	Rv2175c	Rv2088	Rv2207	Rv3038c	Rv3562
Rv2351c	Rv1994c	Rv2592c	Rv2176	Rv2089c	Rv2209	Rv3039c	Rv3563
Rv2356c	Rv1995	Rv2593c	Rv2178c	Rv2090	Rv2210c	Rv3040c	Rv3567c
Rv2357c	Rv1996	Rv2594c	Rv2179c	Rv2091c	Rv2211c	Rv3041c	Rv3568c
Rv2359	Rv1997	Rv2597	Rv2180c	Rv2092c	Rv2212	Rv3043c	Rv3569c
Rv2360c	Rv1998c	Rv2601A	Rv2181	Rv2093c	Rv2213	Rv3044	Rv3570c
Rv2361c	Rv1999c	Rv2602	Rv2182c	Rv2094c	Rv2214c	Rv3045	Rv3571
Rv2362c	Rv2000	Rv2604c	Rv2183c	Rv2095c	Rv2215	Rv3046c	Rv3573c
Rv2363	Rv2001	Rv2605c	Rv2184c	Rv2096c	Rv2216	Rv3048c	Rv3575c
Rv2364c	Rv2002	Rv2606c	Rv2185c	Rv2097c	Rv2218	Rv3049c	Rv3579c
Rv2366c	Rv2003c	Rv2609c	Rv2187	Rv2098c	Rv2219	Rv3050c	Rv3580c
Rv2368c	Rv2004c	Rv2610c	Rv2188c	Rv2099c	Rv2219.1	Rv3051c	Rv3583c
Rv2370c	Rv2005c	Rv2611c	Rv2189c	Rv2100	Rv2220	Rv3052c	Rv3588c
Rv2373c	Rv2006	Rv2614c	Rv2190c	Rv2101	Rv2221c	Rv3053c	Rv3589
Rv2375	Rv2008c	Rv2615c	Rv2191	Rv2102	Rv2222c	Rv3054c	Rv3594
Rv2378c	Rv2009	Rv2617c	Rv2192c	Rv2104c	Rv2223c	Rv3055	Rv3596c
Rv2381c	Rv2010	Rv2618	Rv2195	Rv2106	Rv2224c	Rv3056	Rv3598c
Rv2382c	Rv2011c	Rv2621c	Rv2197c	Rv2107	Rv2225	Rv3057c	Rv3602c
Rv2383c	Rv2012	Rv2622	Rv2198c	Rv2108	Rv2226	Rv3058c	Rv3604c
Rv2384	Rv2013	Rv2624c	Rv2200c	Rv2109c	Rv2227	Rv3059	Rv3607c
Rv2385	Rv2014	Rv2625c	Rv2201	Rv2110c	Rv2228c	Rv3060c	Rv3609c
Rv2386c	Rv2015c	Rv2626c	Rv2202c	Rv2112c	Rv2229c	Rv3061c	Rv3610c
Rv2387	Rv2016	Rv2627c	Rv2203	Rv2113	Rv2230c	Rv3062	Rv3625c
Rv2389c	Rv2017	Rv2630	Rv2205c	Rv2114	Rv2231c	Rv3063	Rv3628
Rv2391	Rv2018	Rv2631	Rv2207	Rv2115c	Rv2232	Rv3070	Rv3631
Rv2392	Rv2019	Rv2632c	Rv2208	Rv2117	Rv2234	Rv3071	Rv3633
Rv2393	Rv2020c	Rv2633c	Rv2209	Rv2118c	Rv2235	Rv3073c	Rv3635
Rv2394	Rv2021c	Rv2636	Rv2210c	Rv2119	Rv2236c	Rv3074	Rv3639c
Rv2395	Rv2022c	Rv2638	Rv2211c	Rv2121c	Rv2237	Rv3075c	Rv3640c
Rv2396	Rv2023c	Rv2642	Rv2212	Rv2122c	Rv2240c	Rv3094c	Rv3641c
Rv2397c	Rv2024c	Rv2643	Rv2213	Rv2123	Rv2241	Rv3095	Rv3644c
Rv2399c	Rv2025c	Rv2646	Rv2214c	Rv2124c	Rv2242	Rv3096	Rv3645
Rv2400c	Rv2026c	Rv2647	Rv2215	Rv2125	Rv2243	Rv3101c	Rv3647c
Rv2402	Rv2027c	Rv2648	Rv2216	Rv2127	Rv2244	Rv3102c	Rv3649
Rv2403c	Rv2028c	Rv2650c	Rv2217	Rv2129c	Rv2245	Rv3104c	Rv3651
Rv2404c	Rv2029c	Rv2651c	Rv2218	Rv2130c	Rv2246	Rv3105c	Rv3658c
Rv2406c	Rv2030c	Rv2653c	Rv2219	Rv2131c	Rv2247	Rv3106	Rv3660c
Rv2407	Rv2031c	Rv2654c	Rv2219.1	Rv2133c	Rv2248	Rv3118	Rv3662c
Rv2408	Rv2032	Rv2655c	Rv2220	Rv2134c	Rv2249c	Rv3120	Rv3663c
Rv2409c	Rv2033c	Rv2658c	Rv2221c	Rv2135c	Rv2250c	Rv3127	Rv3665c
Rv2410c	Rv2034	Rv2659c	Rv2222c	Rv2137c	Rv2251	Rv3129	Rv3666c
Rv2411c	Rv2035	Rv2662	Rv2223c	Rv2138	Rv2252	Rv3133c	Rv3670
Rv2412	Rv2036	Rv2667	Rv2224c	Rv2139	Rv2253	Rv3134c	Rv3671c
Rv2413c	Rv2038c	Rv2669	Rv2226	Rv2140c	Rv2254c	Rv3135	Rv3672c
Rv2414c	Rv2039c	Rv2670c	Rv2228c	Rv2141c	Rv2255c	Rv3136	Rv3673c
Rv2415c	Rv2040c	Rv2671	Rv2229c	Rv2142c	Rv2257c	Rv3137	Rv3674c
Rv2417c	Rv2041c	Rv2672	Rv2230c	Rv2143	Rv2258c	Rv3139	Rv3676
Rv2418c	Rv2042c	Rv2673	Rv2232	Rv2145c	Rv2259	Rv3140	Rv3680
Rv2419c	Rv2043c	Rv2676c	Rv2234	Rv2147c	Rv2260	Rv3141	Rv3682
Rv2420c	Rv2044c	Rv2677c	Rv2235	Rv2148c	Rv2262c	Rv3143	Rv3683
Rv2421c	Rv2045c	Rv2678c	Rv2236c	Rv2149c	Rv2263	Rv3145	Rv3684
Rv2422	Rv2046	Rv2679	Rv2237	Rv2150c	Rv2264c	Rv3146	Rv3685c
Rv2423	Rv2047c	Rv2681	Rv2238c	Rv2151c	Rv2265	Rv3147	Rv3688c
Rv2426c	Rv2048c	Rv2686c	Rv2240c	Rv2152c	Rv2266	Rv3148	Rv3692
Rv2427c	Rv2049c	Rv2687c	Rv2241	Rv2153c	Rv2267c	Rv3149	Rv3694c
Rv2428	Rv2050	Rv2690c	Rv2242	Rv2154c	Rv2268c	Rv3150	Rv3696c
Rv2429	Rv2051c	Rv2691	Rv2243	Rv2155c	Rv2271	Rv3151	Rv3700c
Rv2430c	Rv2052c	Rv2692	Rv2244	Rv2157c	Rv2273	Rv3152	Rv3701c
Rv2431c	Rv2053c	Rv2694c	Rv2245	Rv2158c	Rv2274c	Rv3153	Rv3707c
Rv2434c	Rv2054	Rv2696c	Rv2246	Rv2159c	Rv2275	Rv3156	Rv3710
Rv2435c	Rv2058c	Rv2697c	Rv2247	Rv2160.1	Rv2276	Rv3157	Rv3711c
Rv2436	Rv2059	Rv2698	Rv2248	Rv2161c	Rv2277c	Rv3158	Rv3712
Rv2437	Rv2062c	Rv2700	Rv2249c	Rv2162c	Rv2279	Rv3163c	Rv3714c
Rv2439c	Rv2063	Rv2701c	Rv2250.1	Rv2163c	Rv2280	Rv3164c	Rv3715c
Rv2440c	Rv2064	Rv2702	Rv2250c	Rv2164c	Rv2281	Rv3165c	Rv3718c
Rv2441c	Rv2065	Rv2703	Rv2251	Rv2165c	Rv2282c	Rv3166c	Rv3719
Rv2443	Rv2066	Rv2708c	Rv2252	Rv2166c	Rv2283	Rv3167c	Rv3721c
Rv2444c	Rv2067c	Rv2709	Rv2253	Rv2167c	Rv2284	Rv3168	Rv3725
Rv2445c	Rv2068c	Rv2710	Rv2255c	Rv2169c	Rv2285	Rv3169	Rv3726
Rv2447c	Rv2069	Rv2711	Rv2256c	Rv2170	Rv2286c	Rv3170	Rv3729
Rv2448c	Rv2070c	Rv2712c	Rv2257c	Rv2171	Rv2288	Rv3171c	Rv3730c
Rv2449c	Rv2071c	Rv2713	Rv2258c	Rv2172c	Rv2289	Rv3173c	Rv3732
Rv2450c	Rv2072c	Rv2715	Rv2260	Rv2173	Rv2291	Rv3192	Rv3734c
Rv2451	Rv2073c	Rv2717c	Rv2262c	Rv2174	Rv2293c	Rv3193c	Rv3736
Rv2453c	Rv2074	Rv2718c	Rv2263	Rv2175c	Rv2294	Rv3194c	Rv3740c
Rv2454c	Rv2075c	Rv2719c	Rv2264c	Rv2176	Rv2296	Rv3195	Rv3742c
Rv2455c	Rv2077c	Rv2720	Rv2265	Rv2177c	Rv2297	Rv3196	Rv3743c
Rv2456c	Rv2078	Rv2721c	Rv2266	Rv2178c	Rv2298	Rv3197	Rv3744
Rv2457c	Rv2079	Rv2723	Rv2268c	Rv2179c	Rv2299c	Rv3197.1	Rv3747
Rv2458	Rv2080	Rv2724c	Rv2269c	Rv2181	Rv2300c	Rv3198A	Rv3750c
Rv2459	Rv2081c	Rv2725c	Rv2270	Rv2182c	Rv2301	Rv3198c	Rv3752c
Rv2460c	Rv2082	Rv2726c	Rv2273	Rv2183c	Rv2302	Rv3199c	Rv3755c
Rv2461c	Rv2083	Rv2727c	Rv2275	Rv2184c	Rv2303c	Rv3200c	Rv3756c
Rv2462c	Rv2084	Rv2728c	Rv2276	Rv2185c	Rv2305	Rv3201c	Rv3758c
Rv2463	Rv2085	Rv2731	Rv2277c	Rv2186c	Rv2306.1	Rv3202c	Rv3760
Rv2464c	Rv2086	Rv2732c	Rv2278	Rv2187	Rv2307.2	Rv3203	Rv3761c
Rv2465c	Rv2088	Rv2733c	Rv2279	Rv2188c	Rv2307.4	Rv3204	Rv3762c
Rv2466c	Rv2089c	Rv2734	Rv2280	Rv2189c	Rv2307c	Rv3205c	Rv3764c
Rv2467	Rv2090	Rv2735c	Rv2281	Rv2190c	Rv2308	Rv3206c	Rv3765c
Rv2468c	Rv2091c	Rv2736c	Rv2282c	Rv2191	Rv2309.1	Rv3207c	Rv3767c
Rv2469c	Rv2092c	Rv2737c	Rv2283	Rv2192c	Rv2311	Rv3208	Rv3772
Rv2470	Rv2093c	Rv2739c	Rv2284	Rv2193	Rv2313c	Rv3208.1	Rv3774
Rv2471	Rv2094c	Rv2742c	Rv2285	Rv2194	Rv2314c	Rv3210c	Rv3776
Rv2473	Rv2095c	Rv2743c	Rv2286c	Rv2195	Rv2315c	Rv3212	Rv3777
Rv2474c	Rv2096c	Rv2744c	Rv2288	Rv2196	Rv2316	Rv3213c	Rv3778c
Rv2475c	Rv2097c	Rv2745c	Rv2289	Rv2197c	Rv2318	Rv3214	Rv3779
Rv2476c	Rv2100	Rv2748c	Rv2291	Rv2200c	Rv2319c	Rv3215	Rv3780
Rv2477c	Rv2101	Rv2749	Rv2294	Rv2201	Rv2320c	Rv3216	Rv3781
Rv2483c	Rv2102	Rv2750	Rv2296	Rv2202c	Rv2321c	Rv3218	Rv3782
Rv2486	Rv2103c	Rv2752c	Rv2297	Rv2203	Rv2322c	Rv3220c	Rv3783
Rv2488c	Rv2104c	Rv2753c	Rv2298	Rv2204c	Rv2324	Rv3224	Rv3784
Rv2489c	Rv2105	Rv2754c	Rv2299c	Rv2205c	Rv2325c	Rv3226c	Rv3787c
Rv2491	Rv2106	Rv2756c	Rv2300c	Rv2206	Rv2326c	Rv3227	Rv3790
Rv2492	Rv2107	Rv2757c	Rv2302	Rv2207	Rv2327	Rv3228	Rv3791
Rv2494	Rv2108	Rv2758c	Rv2303c	Rv2209	Rv2329c	Rv3229c	Rv3792
Rv2496c	Rv2109c	Rv2759c	Rv2305	Rv2210c	Rv2330c	Rv3230c	Rv3793
Rv2497c	Rv2110c	Rv2761c	Rv2306.1	Rv2211c	Rv2331	Rv3231c	Rv3794
Rv2498c	Rv2112c	Rv2764c	Rv2306.2	Rv2212	Rv2331.1	Rv3232c	Rv3796
Rv2499c	Rv2114	Rv2767c	Rv2306c	Rv2213	Rv2332	Rv3233c	Rv3799c
Rv2500c	Rv2115c	Rv2768c	Rv2307.2	Rv2214c	Rv2333c	Rv3234c	Rv3800c
Rv2501c	Rv2117	Rv2772c	Rv2307.4	Rv2215	Rv2334	Rv3235	Rv3801c
Rv2502c	Rv2118c	Rv2773c	Rv2307c	Rv2216	Rv2335	Rv3236c	Rv3804c
Rv2503c	Rv2119	Rv2776c	Rv2308	Rv2217	Rv2336	Rv3238c	Rv3805c
Rv2505c	Rv2120c	Rv2778c	Rv2309c	Rv2218	Rv2337c	Rv3241c	Rv3808c
Rv2506	Rv2121c	Rv2779c	Rv2310	Rv2219	Rv2338c	Rv3242c	Rv3809c
Rv2507	Rv2122c	Rv2780	Rv2311	Rv2219.1	Rv2339	Rv3245c	Rv3811
Rv2508c	Rv2123	Rv2781c	Rv2312	Rv2220	Rv2340c	Rv3247c	Rv3813c
Rv2509	Rv2124c	Rv2782c	Rv2314c	Rv2221c	Rv2342	Rv3248c	Rv3814c
Rv2510c	Rv2125	Rv2783c	Rv2315c	Rv2222c	Rv2343c	Rv3249c	Rv3815c
Rv2511	Rv2127	Rv2784c	Rv2316	Rv2224c	Rv2344c	Rv3250c	Rv3818
Rv2513	Rv2129c	Rv2785c	Rv2318	Rv2225	Rv2345	Rv3252c	Rv3822
Rv2514c	Rv2130c	Rv2786c	Rv2319c	Rv2226	Rv2353c	Rv3253c	Rv3823c
Rv2515c	Rv2131c	Rv2787	Rv2320c	Rv2228c	Rv2355	Rv3254	Rv3826
Rv2516c	Rv2132	Rv2788	Rv2321c	Rv2229c	Rv2357c	Rv3255c	Rv3828c
Rv2518c	Rv2133c	Rv2789c	Rv2323c	Rv2230c	Rv2358	Rv3256c	Rv3829c
Rv2521	Rv2134c	Rv2790c	Rv2324	Rv2231c	Rv2359	Rv3259	Rv3834c
Rv2522c	Rv2135c	Rv2791c	Rv2325c	Rv2232	Rv2360c	Rv3260c	Rv3837c
Rv2523c	Rv2137c	Rv2793c	Rv2326c	Rv2234	Rv2361c	Rv3261	Rv3838c
Rv2524c	Rv2138	Rv2794c	Rv2327	Rv2235	Rv2362c	Rv3262	Rv3839
Rv2525c	Rv2139	Rv2796c	Rv2329c	Rv2236c	Rv2363	Rv3263	Rv3846
Rv2528c	Rv2140c	Rv2797c	Rv2330c	Rv2237	Rv2365c	Rv3264c	Rv3849
Rv2529	Rv2141c	Rv2800	Rv2331	Rv2238c	Rv2366c	Rv3265c	Rv3850
Rv2530c	Rv2142c	Rv2801c	Rv2331.1	Rv2240c	Rv2368c	Rv3266c	Rv3853
Rv2531c	Rv2143	Rv2802c	Rv2332	Rv2241	Rv2369c	Rv3267	Rv3855
Rv2532c	Rv2145c	Rv2803	Rv2334	Rv2242	Rv2370c	Rv3268	Rv3856c
Rv2533c	Rv2147c	Rv2805	Rv2335	Rv2243	Rv2372c	Rv3269	Rv3858c
Rv2534c	Rv2148c	Rv2807	Rv2336	Rv2245	Rv2373c	Rv3270	Rv3859c
Rv2535c	Rv2149c	Rv2810c	Rv2337c	Rv2246	Rv2374c	Rv3272	Rv3860
Rv2536	Rv2150c	Rv2811	Rv2338c	Rv2247	Rv2375	Rv3274c	Rv3863
Rv2538c	Rv2151c	Rv2812	Rv2339	Rv2248	Rv2378c	Rv3275c	Rv3866
Rv2539c	Rv2152c	Rv2813	Rv2340c	Rv2249c	Rv2379c	Rv3276c	Rv3868
Rv2540c	Rv2153c	Rv2815c	Rv2342	Rv2250c	Rv2380c	Rv3277	Rv3869
Rv2542	Rv2154c	Rv2816c	Rv2343c	Rv2251	Rv2381c	Rv3278c	Rv3870
Rv2543	Rv2155c	Rv2817c	Rv2344c	Rv2252	Rv2382c	Rv3279c	Rv3876
Rv2544	Rv2156c	Rv2818c	Rv2345	Rv2253	Rv2383c	Rv3280	Rv3879c
Rv2545	Rv2157c	Rv2819c	Rv2347c	Rv2254c	Rv2384	Rv3281	Rv3882c
Rv2547	Rv2158c	Rv2820c	Rv2349c	Rv2255c	Rv2385	Rv3283	Rv3884c
Rv2548	Rv2159c	Rv2821c	Rv2350c	Rv2256c	Rv2386c	Rv3284	Rv3885c
Rv2549c	Rv2160.1	Rv2823c	Rv2351c	Rv2257c	Rv2387	Rv3285	Rv3887c
Rv2550c	Rv2160c	Rv2825c	Rv2354	Rv2258c	Rv2390c	Rv3286c	Rv3888c
Rv2551c	Rv2161c	Rv2826c	Rv2355	Rv2259	Rv2391	Rv3287c	Rv3889c
Rv2552c	Rv2163c	Rv2827c	Rv2356c	Rv2260	Rv2392	Rv3290c	Rv3894c
Rv2553c	Rv2164c	Rv2828c	Rv2357c	Rv2262c	Rv2393	Rv3291c	Rv3895c
Rv2554c	Rv2165c	Rv2829c	Rv2358	Rv2263	Rv2394	Rv3292	Rv3896c
Rv2555c	Rv2166c	Rv2830c	Rv2360c	Rv2264c	Rv2395	Rv3293	Rv3900c
Rv2557	Rv2167c	Rv2831	Rv2361c	Rv2265	Rv2397c	Rv3295	Rv3907c
Rv2558	Rv2168c	Rv2832c	Rv2362c	Rv2266	Rv2398c	Rv3296	Rv3908
Rv2559c	Rv2169c	Rv2833c	Rv2363	Rv2267c	Rv2399c	Rv3298c	Rv3909
Rv2560	Rv2170	Rv2834c	Rv2364c	Rv2268c	Rv2401	Rv3300c	Rv3910
Rv2563	Rv2171	Rv2835c	Rv2365c	Rv2274c	Rv2402	Rv3302c	Rv3912
Rv2564	Rv2172c	Rv2837c	Rv2366c	Rv2275	Rv2403c	Rv3305c	Rv3913
Rv2565	Rv2173	Rv2838c	Rv2368c	Rv2276	Rv2404c	Rv3306c	Rv3914
Rv2567	Rv2175c	Rv2839c	Rv2369c	Rv2277c	Rv2406c	Rv3307	Rv3915
Rv2568c	Rv2176	Rv2840c	Rv2370c	Rv2279	Rv2407	Rv3308	Rv3916c
Rv2569c	Rv2177c	Rv2841c	Rv2372c	Rv2280	Rv2408	Rv3309c	Rv3918c
Rv2570	Rv2178c	Rv2842c	Rv2373c	Rv2281	Rv2409c	Rv3310	Rv3922c
Rv2571c	Rv2179c	Rv2843	Rv2374c	Rv2282c	Rv2410c	Rv3311	Rv3923c
Rv2572c	Rv2180c	Rv2844	Rv2375	Rv2284	Rv2411c	Rv3313c
Rv2574	Rv2181	Rv2845c	Rv2378c	Rv2285	Rv2412	Rv3314c
Rv2575	Rv2182c	Rv2847c	Rv2379c	Rv2286c	Rv2413c	Rv3315c
Rv2576c	Rv2183c	Rv2848c	Rv2380c	Rv2287	Rv2414c	Rv3316
Rv2577	Rv2184c	Rv2849c	Rv2381c	Rv2288	Rv2415c	Rv3317
Rv2578c	Rv2185c	Rv2850c	Rv2382c	Rv2289	Rv2416c	Rv3318
Rv2579	Rv2187	Rv2854	Rv2383c	Rv2294	Rv2417c	Rv3319
Rv2580c	Rv2188c	Rv2855	Rv2384	Rv2295	Rv2418c	Rv3322c
Rv2582	Rv2189c	Rv2857c	Rv2385	Rv2296	Rv2419c	Rv3327
Rv2583c	Rv2190c	Rv2858c	Rv2386c	Rv2297	Rv2420c	Rv3328c
Rv2584c	Rv2191	Rv2859c	Rv2387	Rv2298	Rv2421c	Rv3329
Rv2585c	Rv2192c	Rv2862c	Rv2388c	Rv2299c	Rv2423	Rv3332
Rv2586c	Rv2193	Rv2864c	Rv2389c	Rv2300c	Rv2425c	Rv3336c
Rv2587c	Rv2194	Rv2865	Rv2391	Rv2301	Rv2426c	Rv3337
Rv2588c	Rv2195	Rv2867c	Rv2392	Rv2303c	Rv2427c	Rv3338
Rv2589	Rv2196	Rv2868c	Rv2393	Rv2304c	Rv2429	Rv3339c
Rv2590	Rv2197c	Rv2869c	Rv2394	Rv2305	Rv2430c	Rv3341
Rv2592c	Rv2198c	Rv2870c	Rv2395	Rv2306.1	Rv2431c	Rv3342
Rv2593c	Rv2200c	Rv2871	Rv2397c	Rv2306.2	Rv2434c	Rv3346c
Rv2594c	Rv2201	Rv2874	Rv2398c	Rv2307.4	Rv2435c	Rv3355c
Rv2596	Rv2202c	Rv2877c	Rv2399c	Rv2307c	Rv2436	Rv3356c
Rv2597	Rv2203	Rv2879c	Rv2401	Rv2308	Rv2438c	Rv3359
Rv2599	Rv2204c	Rv2880c	Rv2402	Rv2309.1	Rv2439c	Rv3361c
Rv2601	Rv2205c	Rv2883c	Rv2403c	Rv2309c	Rv2440c	Rv3362c
Rv2602	Rv2206	Rv2884	Rv2404c	Rv2310	Rv2441c	Rv3363c
Rv2603c	Rv2207	Rv2885c	Rv2405	Rv2311	Rv2442c	Rv3364c
Rv2604c	Rv2209	Rv2886c	Rv2406c	Rv2312	Rv2443	Rv3365c
Rv2605c	Rv2210c	Rv2887	Rv2407	Rv2313c	Rv2444c	Rv3366
Rv2606c	Rv2211c	Rv2888c	Rv2408	Rv2314c	Rv2445c	Rv3368c
Rv2607	Rv2212	Rv2889c	Rv2409c	Rv2315c	Rv2447c	Rv3370c
Rv2608	Rv2213	Rv2890c	Rv2410c	Rv2316	Rv2448c	Rv3371
Rv2609c	Rv2214c	Rv2891	Rv2411c	Rv2317	Rv2449c	Rv3372
Rv2610c	Rv2215	Rv2892c	Rv2412	Rv2318	Rv2451	Rv3389c
Rv2611c	Rv2216	Rv2893	Rv2413c	Rv2319c	Rv2453c	Rv3390
Rv2612c	Rv2217	Rv2894c	Rv2414c	Rv2320c	Rv2454c	Rv3391
Rv2613c	Rv2218	Rv2896c	Rv2415c	Rv2321c	Rv2455c	Rv3393
Rv2614c	Rv2219	Rv2897c	Rv2416c	Rv2322c	Rv2456c	Rv3394c
Rv2616	Rv2219.1	Rv2898c	Rv2417c	Rv2323c	Rv2457c	Rv3395c
Rv2617c	Rv2220	Rv2899c	Rv2419c	Rv2324	Rv2458	Rv3400
Rv2619c	Rv2221c	Rv2900c	Rv2421c	Rv2325c	Rv2459	Rv3401
Rv2620c	Rv2223c	Rv2902c	Rv2423	Rv2326c	Rv2460c	Rv3405c
Rv2621c	Rv2224c	Rv2903c	Rv2424c	Rv2327	Rv2461c	Rv3406
Rv2622	Rv2225	Rv2906c	Rv2425c	Rv2329c	Rv2462c	Rv3409c
Rv2623	Rv2226	Rv2908c	Rv2426c	Rv2331	Rv2463	Rv3410c
[truncated: 1,545 more rows]

## Sheet: Sheet3
MTB core proteome
Rv loci	NAME
RV3494C	mce4F MCE-family protein virulence, detoxification, adaptation
RV3670	ephE epoxide hydrolase virulence, detoxification, adaptation
RV3846	sodA superoxide dismutase virulence, detoxification, adaptation
RV2006	otsB1 trehalose-6-phosphate phosphatase virulence, detoxification, adaptation
RV3499C	mce4A MCE-family protein virulence, detoxification, adaptation
RV3660C	conserved hypothetical protein virulence, detoxification, adaptation
RV1608C	bcpB peroxidoxin virulence, detoxification, adaptation
RV1085C	hemolysin virulence, detoxification, adaptation
RV0350	dnaK chaperone protein virulence, detoxification, adaptation
RV2373C	dnaJ2 chaperone protein virulence, detoxification, adaptation
RV0440	groEL 60 kda chaperonin 2 groEL2 virulence, detoxification, adaptation
RV1966	mce3A MCE-family protein virulence, detoxification, adaptation
RV2521	bcp bacterioferritin comigratory protein virulence, detoxification, adaptation
RV1901	cinA competence damage-inducible protein A virulence, detoxification, adaptation
RV3497C	mce4C MCE-family protein virulence, detoxification, adaptation
RV0554	bpoC non-haem peroxidase virulence, detoxification, adaptation
RV3372	otsB2 trehalose-6-phosphate phosphatase virulence, detoxification, adaptation
RV1477	invasion-associated protein virulence, detoxification, adaptation
RV3922C	hemolysin virulence, detoxification, adaptation
RV2238C	ahpE peroxiredoxin virulence, detoxification, adaptation
RV0384C	clpB endopeptidase ATP binding protein chain B virulence, detoxification, adaptation
RV0351	grpE chaperone virulence, detoxification, adaptation
RV1908C	katG catalase-peroxidase-peroxynitritase T virulence, detoxification, adaptation
RV2701C	suhB extragenic suppressor protein virulence, detoxification, adaptation
RV1938	ephB epoxide hydrolase virulence, detoxification, adaptation
RV2214C	ephD short-chain type dehydrogenase virulence, detoxification, adaptation
RV1694	tlyA cytotoxin|haemolysin virulence, detoxification, adaptation
RV3490	otsA alpha, alpha-trehalose-phosphate synthase virulence, detoxification, adaptation
RV0352	dnaJ1 chaperone protein virulence, detoxification, adaptation
RV2299C	htpG chaperone protein virulence, detoxification, adaptation
RV0634C	glyoxalase II virulence, detoxification, adaptation
RV3417C	groEL 60 kda chaperonin 1 groEL1 virulence, detoxification, adaptation
RV2940C	mas multifunctional mycocerosic acid synthase membrane-associated lipid metabolism
RV1493	mutB methylmalonyl-CoA mutase large subunit lipid metabolism
RV0645C	mmaA1 methoxy mycolic acid synthase 1 lipid metabolism
RV3515C	fadD19 fatty-acid-CoA ligase lipid metabolism
RV1660	pks10 chalcone synthase lipid metabolism
RV0904C	accD3 acetyl-CoA carboxylase carboxyl transferase beta subunit lipid metabolism
RV3826	fadD23 fatty-acid-CoA ligase lipid metabolism
RV2831	echA16 enoyl-CoA hydratase lipid metabolism
RV1521	fadD25 fatty-acid-CoA ligase lipid metabolism
RV0752C	fadE9 acyl-CoA dehydrogenase lipid metabolism
RV2247	accD6 acetyl/propionyl-CoA carboxylase beta subunit lipid metabolism
RV3506	fadD17 fatty-acid-CoA synthetase lipid metabolism
RV3546	fadA5 acetyl-CoA acetyltransferase lipid metabolism
RV2939	papA5 polyketide synthase associated protein lipid metabolism
RV3061C	fadE22 acyl-CoA dehydrogenase lipid metabolism
RV0468	fadB2 3-hydroxybutyryl-CoA dehydrogenase lipid metabolism
RV3800C	pks13 polyketide synthase lipid metabolism
RV0675	echA5 enoyl-CoA hydratase lipid metabolism
RV1094	desA2 acyl-[acyl-carrier protein] desaturase lipid metabolism
RV2505C	fadD35 fatty-acid-CoA ligase lipid metabolism
RV2941	fadD28 fatty-acid-CoA ligase lipid metabolism
RV1350	fabG 3-oxoacyl-[acyl-carrier protein] reductase fabG2 lipid metabolism
RV1551	plsB1 acyltransferase lipid metabolism
RV1483	fabG1 3-oxoacyl-[acyl-carrier protein] reductase lipid metabolism
RV2500C	fadE19 acyl-CoA dehydrogenase lipid metabolism
RV3409C	choD cholesterol oxidase precursor lipid metabolism
RV1345	fadD33 polyketide synthase lipid metabolism
RV2503C	scoB succinyl-CoA:3-ketoacid-coenzyme A transferase beta subunit lipid metabolism
RV1346	fadE14 acyl-CoA dehydrogenase lipid metabolism
RV1543	fatty-acyl-CoA reductase lipid metabolism
RV1472	echA12 enoyl-CoA hydratase lipid metabolism
RV1372	pks18 conserved hypothetical protein lipid metabolism
RV0905	echA6 enoyl-CoA hydratase lipid metabolism
RV0852	fadD16 fatty-acid-CoA ligase lipid metabolism
RV1070C	echA8 enoyl-CoA hydratase lipid metabolism
RV0035	fadD34 fatty-acid-CoA ligase lipid metabolism
RV1323	fadA4 acetyl-CoA acetyltransferase lipid metabolism
RV0533C	fabH 3-oxoacyl-[acyl-carrier-protein] synthase III lipid metabolism
RV3801C	fadD32 fatty-acid-CoA ligase lipid metabolism
RV1185C	fadD21 fatty-acid-CoA ligase lipid metabolism
RV2501C	accA1 acetyl-/propionyl-CoA carboxylase alpha subunit lipid metabolism
RV2948C	fadD22 fatty-acid-CoA ligase lipid metabolism
RV0045C	hydrolase lipid metabolism
RV2679	echA15 enoyl-CoA hydratase lipid metabolism
RV2246	kasB 3-oxoacyl-[acyl-carrier protein] synthase 2 lipid metabolism
RV3804C	fbpA secreted fibronectin-binding protein antigen lipid metabolism
RV3550	echA20 enoyl-CoA hydratase lipid metabolism
RV0972C	fadE12 acyl-CoA dehydrogenase lipid metabolism
RV3505	fadE27 acyl-CoA dehydrogenase lipid metabolism
RV0099	fadD10 fatty-acid-CoA ligase lipid metabolism
RV2982C	gpsA glycerol-3-phosphate dehydrogenase gpdA2 lipid metabolism
RV1182	papA3 polyketide synthase associated protein lipid metabolism
RV1550	fadD11 fatty-acid-CoA ligase lipid metabolism
RV0824C	desA1 acyl-[acyl-carrier protein] desaturase lipid metabolism
RV2244	acpM meromycolate extension acyl carrier protein lipid metabolism
RV1013	pks16 polyketide synthase lipid metabolism
RV0855	far fatty-acid-CoA racemase lipid metabolism
RV2187	fadD15 long-chain fatty-acid-CoA ligase lipid metabolism
RV2605C	tesB2 acyl-CoA thioesterase II lipid metabolism
RV2383C	mbtB phenyloxazoline synthase lipid metabolism
RV2950C	fadD29 fatty-acid-CoA ligase lipid metabolism
RV2502C	accD1 acetyl-/propionyl-CoA carboxylase beta subunit lipid metabolism
RV0914C	lipid carrier protein or keto acyl-CoA thiolase lipid metabolism
RV1715	fadB3 3-hydroxybutyryl-CoA dehydrogenase lipid metabolism
RV3089	fadD13 fatty-acid-CoA ligase lipid metabolism
RV3229C	desA3 linoleoyl-CoA desaturase lipid metabolism
RV2002	fabG3 20-beta-hydroxysteroid dehydrogenase lipid metabolism
RV3274C	fadE25 acyl-CoA dehydrogenase lipid metabolism
RV0436C	pssA CDP-diacylglycerol-serine o-phosphatidyltransferase lipid metabolism
RV0873	fadE10 acyl-CoA dehydrogenase lipid metabolism
RV3556C	fadA6 acetyl-CoA acetyltransferase lipid metabolism
RV3280	accD5 propionyl-CoA carboxylase beta chain 5 lipid metabolism
RV3472	conserved hypothetical protein lipid metabolism
RV2486	echA14 enoyl-CoA hydratase lipid metabolism
RV3562	fadE31 acyl-CoA dehydrogenase lipid metabolism
RV0129C	fbpC secreted fibronectin-binding protein C antigen 85-C lipid metabolism
RV2930	fadD26 fatty-acid-CoA ligase lipid metabolism
RV3523	ltp3 lipid carrier protein or keto acyl-CoA thiolase lipid metabolism
RV3039C	echA17 enoyl-CoA hydratase lipid metabolism
RV2935	ppsE phenolpthiocerol synthesis type-I polyketide synthase lipid metabolism
RV3560C	fadE30 acyl-CoA dehydrogenase lipid metabolism
RV0404	fadD30 fatty-acid-CoA ligase lipid metabolism
RV3641C	fic cell filamentation protein cell wall and cell processes
RV1481	membrane protein cell wall and cell processes
RV2937	drrB daunorubicin-dim-transport membrane protein ABC transporter cell wall and cell processes
RV1997	ctpF metal cation transporting P-type ATPase cell wall and cell processes
RV3645	conserved membrane protein cell wall and cell processes
RV2155C	murD UDP-N-acetylmuramoylalanine-D-glutamate ligase cell wall and cell processes
RV1159	conserved membrane protein cell wall and cell processes
RV3495C	lprN MCE-family lipoprotein mce4E cell wall and cell processes
RV2673	conserved membrane protein cell wall and cell processes
RV1418	lprH lipoprotein cell wall and cell processes
RV2339	mmpL9 transmembrane transport protein cell wall and cell processes
RV3270	ctpC metal cation transporting P-type ATPase cell wall and cell processes
RV2209	conserved membrane protein cell wall and cell processes
RV0625C	conserved membrane protein cell wall and cell processes
RV2145C	wag31 hypothetical protein cell wall and cell processes
RV0955	conserved membrane protein cell wall and cell processes
RV0876C	conserved membrane protein cell wall and cell processes
RV0202C	mmpL11 transmembrane transport protein cell wall and cell processes
RV1522C	mmpL12 transmembrane transport protein cell wall and cell processes
RV1999C	conserved membrane protein cell wall and cell processes
RV3805C	conserved membrane protein cell wall and cell processes
RV1110	lytB2 lytB-related protein cell wall and cell processes
RV1315	murA UDP-N-acetylglucosamine 1-carboxyvinyltransferase cell wall and cell processes
RV3658C	conserved membrane protein cell wall and cell processes
RV2869C	conserved membrane protein cell wall and cell processes
RV2686C	antibiotic-transport membrane leucine and alanine and valine rich protein ABC transporter cell wall and cell processes
RV2723	conserved membrane protein cell wall and cell processes
RV0346C	ansP2 L-asparagine permease cell wall and cell processes
RV0475	hbhA iron-regulated heparin binding hemagglutinin cell wall and cell processes
RV2874	dipZ cytochrome C biogenesis protein cell wall and cell processes
RV2326C	transmembrane ATP-binding protein ABC transorter cell wall and cell processes
RV1282C	oppC oligopeptide-transport membrane protein ABC transporter cell wall and cell processes
RV0072	glutamine-transport transmembrane protein ABC transporter cell wall and cell processes
RV3448	conserved membrane protein cell wall and cell processes
RV2813	conserved hypothetical protein cell wall and cell processes
RV1514C	conserved hypothetical protein cell wall and cell processes
RV2564	glnQ glutamine-transport ATP-binding protein ABC transporter cell wall and cell processes
RV3793	embC membrane indolylacetylinositol arabinosyltransferase cell wall and cell processes
RV2181	conserved membrane protein cell wall and cell processes
RV1018C	glmU UDP-N-acetylglucosamine pyrophosphorylase cell wall and cell processes
RV0806C	cpsY UDP-glucose-4-epimerase cell wall and cell processes
RV1747	conserved transmembrane ATP-binding protein ABC transporter cell wall and cell processes
RV2834C	ugpE sn-glycerol-3-phosphate transport membrane protein ABC transporter cell wall and cell processes
RV1411C	lprG lipoprotein cell wall and cell processes
RV0103C	ctpB cation-transporter P-type ATPase B cell wall and cell processes
RV0107C	ctpI cation-transporter ATPase I cell wall and cell processes
RV2281	pitB phosphate-transport permease cell wall and cell processes
RV1992C	ctpG metal cation transporting P-type ATPase cell wall and cell processes
RV0073	glutamine-transport ATP-binding protein ABC transporter cell wall and cell processes
RV1302	rfe undecapaprenyl-phosphate alpha-N-acetylglucosaminyltransferase cell wall and cell processes
RV2586C	secF protein-export membrane protein cell wall and cell processes
RV3240C	secA1 preprotein translocase cell wall and cell processes
RV1030	kdpB potassium-transporting ATPase B chain cell wall and cell processes
RV3782	rfbE L-rhamnosyltransferase cell wall and cell processes
RV2152C	murC UDP-N-acetylmuramate-alanine ligase cell wall and cell processes
RV3887C	conserved membrane protein cell wall and cell processes
RV0885	conserved hypothetical protein cell wall and cell processes
RV2091C	membrane protein cell wall and cell processes
RV1348	drugs-transport transmembrane ATP-binding protein ABC transporter cell wall and cell processes
RV1557	mmpL6 transmembrane transport protein cell wall and cell processes
RV2916C	ffh signal recognition particle protein cell wall and cell processes
RV0933	pstB phosphate-transport ATP-binding protein ABC transporter cell wall and cell processes
RV2587C	secD protein-export membrane protein cell wall and cell processes
RV1857	modA molybdate-binding lipoprotein cell wall and cell processes
RV1280C	oppA periplasmic oligopeptide-binding lipoprotein cell wall and cell processes
RV3682	ponA2 bifunctional membrane-associated penicillin-binding protein 1A/1B cell wall and cell processes
RV0928	pstS3 periplasmic phosphate-binding lipoprotein cell wall and cell processes
RV0820	phoT phosphate-transport ATP-binding protein ABC transporter cell wall and cell processes
RV1490	membrane protein cell wall and cell processes
RV2158C	murE UDP-N-acetylmuramoylalanyl-D-glutamate-2,6-diaminopimelat E ligase cell wall and cell processes
RV3794	embA membrane indolylacetylinositol arabinosyltransferase cell wall and cell processes
RV2691	ceoB trk system potassium uptake protein cell wall and cell processes
RV3625C	mesJ cell cycle protein cell wall and cell processes
RV0930	pstA1 phosphate-transport membrane ABC transporter cell wall and cell processes
RV3610C	ftsH membrane-bound ell division protein cell wall and cell processes
RV2832C	ugpC sn-glycerol-3-phosphate transport ATP-binding protein ABC transporter cell wall and cell processes
RV1859	modC molybdenum-transport ATP-binding protein ABC transporter cell wall and cell processes
RV2462C	tig trigger factor protein cell wall and cell processes
RV0402C	mmpL1 transmembrane transport protein cell wall and cell processes
RV0482	murB UDP-N-acetylenolpyruvoylglucosamine reductase cell wall and cell processes
RV0935	pstC1 phosphate-transport membrane ABC transporter cell wall and cell processes
RV0732	secY preprotein translocase cell wall and cell processes
RV2544	lppB lipoprotein cell wall and cell processes
RV0265C	fecB2 periplasmic iron-transport lipoprotein cell wall and cell processes
RV2692	ceoC trk system potassium uptake protein cell wall and cell processes
RV2563	glutamine-transport transmembrane protein ABC transporter cell wall and cell processes
RV3809C	glf UDP-galactopyranose mutase cell wall and cell processes
RV0292	conserved membrane protein cell wall and cell processes
RV1739C	sulphate-transport transmembrane protein ABC transporter cell wall and cell processes
RV1491C	conserved membrane protein cell wall and cell processes
RV1811	mgtC Mg2+ transport ATPase C cell wall and cell processes
RV2127	ansP1 L-asparagine permease cell wall and cell processes
RV2903C	lepB signal peptidase I cell wall and cell processes
RV1281C	oppD oligopeptide-transport ATP-binding protein ABC transporter cell wall and cell processes
RV3666C	dppA periplasmic dipeptide-binding lipoprotein cell wall and cell processes
RV2911	dacB2 D-alanyl-D-alanine carboxypeptidase cell wall and cell processes
RV2936	drrA daunorubicin-dim-transport ATP-binding protein ABC transporter cell wall and cell processes
RV1236	sugA sugar-transport membrane protein ABC transporter cell wall and cell processes
RV1819C	drugs-transport transmembrane ATP-binding protein ABC transporter cell wall and cell processes
RV2150C	ftsZ cell division protein cell wall and cell processes
RV1841C	conserved membrane protein cell wall and cell processes
RV1368	lprF lipoprotein cell wall and cell processes
RV0908	ctpE metal cation transporting P-type ATPase cell wall and cell processes
RV0671	lpqP lipoprotein cell wall and cell processes
RV0522	gabP gabA permease cell wall and cell processes
RV3680	anion transporter ATPase cell wall and cell processes
RV1101C	conserved membrane protein cell wall and cell processes
RV3743C	ctpJ cation transporter P-type ATPase cell wall and cell processes
RV1821	secA2 preprotein translocase ATPase cell wall and cell processes
RV3792	conserved membrane protein cell wall and cell processes
RV2942	mmpL7 transmembrane transport protein cell wall and cell processes
RV2643	arsC arsenic-transport membrane protein cell wall and cell processes
RV2994	conserved membrane protein cell wall and cell processes
RV2945C	lppX lipoprotein cell wall and cell processes
RV3101C	ftsX cell division protein cell wall and cell processes
RV2265	conserved membrane protein cell wall and cell processes
RV0817C	hypothetical exported protein cell wall and cell processes
RV1238	sugC sugar-transport ATP-binding protein ABC transporter cell wall and cell processes
RV2154C	ftsW cell division protein cell wall and cell processes
RV1469	ctpD cation transporter P-type ATPase D cell wall and cell processes
RV0593	lprL MCE-family lipoprotein mce2E cell wall and cell processes
RV0686	membrane protein cell wall and cell processes
RV1272C	drugs-transport transmembrane ATP-binding protein ABC transporter cell wall and cell processes
RV2921C	ftsY cell division protein cell wall and cell processes
RV3450C	conserved membrane protein cell wall and cell processes
RV3823C	mmpL8 membrane transport protein cell wall and cell processes
RV1733C	conserved membrane protein cell wall and cell processes
RV0016C	pbpA penicillin-binding protein cell wall and cell processes
RV2224C	exported protease cell wall and cell processes
RV3635	conserved membrane protein cell wall and cell processes
RV3244C	lpqB lipoprotein cell wall and cell processes
RV1877	conserved membrane protein cell wall and cell processes
RV2748C	ftsK cell division transmembrane protein cell wall and cell processes
RV3663C	dppD dipeptide-transport ATP-binding protein ABC transporter cell wall and cell processes
RV1349	drugs-transport transmembrane ATP-binding protein ABC transporter cell wall and cell processes
RV0506	mmpS2 membrane protein cell wall and cell processes
RV0604	lpqO lipoprotein cell wall and cell processes
RV2477C	macrolide-transport ATP-binding protein ABC transporter cell wall and cell processes
RV3910	conserved membrane protein cell wall and cell processes
RV0936	pstA2 phosphate-transport membrane ABC transporter cell wall and cell processes
RV2397C	cysA1 sulfate-transport ATP-binding protein ABC transporter cell wall and cell processes
RV2151C	ftsQ cell division protein cell wall and cell processes
RV3665C	dppB dipeptide-transport membrane protein ABC transporter cell wall and cell processes
RV1842C	conserved membrane protein cell wall and cell processes
RV3236C	kefB conserved membrane transport protein cell wall and cell processes
RV2345	conserved membrane protein cell wall and cell processes
RV0929	pstC2 phosphate-transport membrane ABC transporter cell wall and cell processes
RV1016C	lpqT lipoprotein cell wall and cell processes
RV0497	conserved membrane protein cell wall and cell processes
RV1235	lpqY sugar-binding lipoprotein cell wall and cell processes
RV1273C	drugs-transport transmembrane ATP-binding protein ABC transporter cell wall and cell processes
RV1270C	lprA lipoprotein cell wall and cell processes
RV3193C	conserved membrane protein cell wall and cell processes
RV2456C	conserved membrane transport protein cell wall and cell processes
RV2454C	oxidoreductase beta subunit intermediary metabolism and respiration
RV0510	hemC porphobilinogen deaminase intermediary metabolism and respiration
RV1098C	fumC fumarase fum intermediary metabolism and respiration
RV0803	purL phosphoribosylformylglycinamidine synthase II intermediary metabolism and respiration
RV1500	glycosyltransferase intermediary metabolism and respiration
RV2470	glbO oxygen-binding protein globin intermediary metabolism and respiration
RV3276C	purK phosphoribosylaminoimidazole carboxylase ATPase subunit intermediary metabolism and respiration
RV3700C	conserved hypothetical protein intermediary metabolism and respiration
RV3588C	carbonic anhydrase intermediary metabolism and respiration
RV1464	csd cysteine desulfurase intermediary metabolism and respiration
RV2066	cobI bifunctional cobI-cobJ fusion protein intermediary metabolism and respiration
RV3858C	gltD NADH-dependent glutamate synthase small subunit intermediary metabolism and respiration
RV2780	ald 40 kda secreted L-alanine dehydrogenase intermediary metabolism and respiration
RV3116	moeB2 molybdenum cofactor biosynthesis protein intermediary metabolism and respiration
RV3248C	sahH adenosylhomocysteinase intermediary metabolism and respiration
RV1260	oxidoreductase intermediary metabolism and respiration
RV2888C	amiC amidase intermediary metabolism and respiration
RV1659	argH argininosuccinate lyase intermediary metabolism and respiration
RV3283	sseA thiosulfate sulfurtransferase intermediary metabolism and respiration
RV0889C	citA citrate synthase II intermediary metabolism and respiration
RV0869C	moaA2 molybdenum cofactor biosynthesis protein A2 intermediary metabolism and respiration
RV1017C	prsA ribose-phosphate pyrophosphokinase intermediary metabolism and respiration
RV2952	methyltransferase/methylase intermediary metabolism and respiration
RV2677C	hemY protoporphyrinogen oxidase intermediary metabolism and respiration
RV2447C	folC folylpolyglutamate synthase protein intermediary metabolism and respiration
RV1625C	cya membrane-anchored adenylyl cyclase intermediary metabolism and respiration
RV2217	lipB lipoate biosynthesis protein B intermediary metabolism and respiration
RV2071C	cobM precorrin-4 c11-methyltransferase intermediary metabolism and respiration
RV2294	aminotransferase intermediary metabolism and respiration
RV2455C	oxidoreductase alpha subunit intermediary metabolism and respiration
RV3079C	conserved hypothetical protein intermediary metabolism and respiration
RV3772	hisC2 histidinol-phosphate aminotransferase intermediary metabolism and respiration
RV3579C	tRNA/rRNA methyltransferase intermediary metabolism and respiration
RV3052C	nrdI hypothetical protein intermediary metabolism and respiration
RV2847C	cysG multifunctional siroheme synthase intermediary metabolism and respiration
RV1564C	treX maltooligosyltrehalose synthase intermediary metabolism and respiration
RV2857C	short-chain type dehydrogenase/reductase intermediary metabolism and respiration
RV2849C	cobO cob(I)alamin adenosyltransferase intermediary metabolism and respiration
RV0438C	moeA2 molybdopterin biosynthesis protein intermediary metabolism and respiration
RV2726C	dapF diaminopimelate epimerase intermediary metabolism and respiration
RV2483C	plsC bifunctionnal phospholipid biosynthesis enzyme intermediary metabolism and respiration
RV0512	hemB delta-aminolevulinic acid dehydratase intermediary metabolism and respiration
RV2951C	oxidoreductase intermediary metabolism and respiration
RV1448C	tal transaldolase intermediary metabolism and respiration
RV3048C	nrdF2 ribonucleoside-diphosphate reductase beta chain intermediary metabolism and respiration
RV3923C	rnpA ribonuclease P protein component intermediary metabolism and respiration
RV3119	moaE1 molybdenum cofactor biosynthesis protein E intermediary metabolism and respiration
RV0957	purH bifunctional purine biosynthesis protein intermediary metabolism and respiration
RV1604	impA inositol-monophosphatase intermediary metabolism and respiration
RV2344C	dgt deoxyguanosine triphosphate triphosphohydrolase intermediary metabolism and respiration
RV1392	metK S-adenosylmethionine synthetase intermediary metabolism and respiration
RV2178C	aroG 3-deoxy-D-arabino-heptulosonate 7-phosphate synthase intermediary metabolism and respiration
RV2883C	pyrH uridylate kinase intermediary metabolism and respiration
RV0778	cyp126 cytochrome P450 126 intermediary metabolism and respiration
RV1609	trpE anthranilate synthase component I intermediary metabolism and respiration
RV2029C	pfkB phosphofructokinase intermediary metabolism and respiration
RV3059	cyp136 cytochrome P450 136 intermediary metabolism and respiration
RV2971	oxidoreductase intermediary metabolism and respiration
RV0843	dehydrogenase intermediary metabolism and respiration
RV0501	galE2 UDP-glucose 4-epimerase intermediary metabolism and respiration
RV1293	lysA diaminopimelate decarboxylase intermediary metabolism and respiration
RV1851	ureF urease accessory protein intermediary metabolism and respiration
RV0940C	oxidoreductase intermediary metabolism and respiration
RV0548C	menB naphthoate synthase intermediary metabolism and respiration
RV1437	pgk phosphoglycerate kinase intermediary metabolism and respiration
RV2068C	blaC class A beta-lactamase intermediary metabolism and respiration
RV1655	argD acetylornithine aminotransferase intermediary metabolism and respiration
RV3398C	idsA1 multifunctional geranylgeranyl pyrophosphate synthetase intermediary metabolism and respiration
RV1832	gcvB glycine dehydrogenase intermediary metabolism and respiration
RV1848	ureA urease gamma subunit intermediary metabolism and respiration
RV2850C	magnesium chelatase intermediary metabolism and respiration
RV3151	nuoG NADH dehydrogenase I chain G intermediary metabolism and respiration
RV0840C	pip proline iminopeptidase intermediary metabolism and respiration
RV2583C	relA GTP pyrophosphokinase intermediary metabolism and respiration
RV1833C	haloalkane dehalogenase intermediary metabolism and respiration
RV3106	fprA NADPH:adrenodoxin oxidoreductase intermediary metabolism and respiration
RV1381	pyrC dihydroorotase intermediary metabolism and respiration
RV3470C	ilvB2 acetolactate synthase large subunit intermediary metabolism and respiration
RV1820	ilvG acetolactate synthase intermediary metabolism and respiration
RV2782C	pepR zinc protease intermediary metabolism and respiration
RV0772	purD phosphoribosylamine-glycine ligase intermediary metabolism and respiration
RV1895	dehydrogenase intermediary metabolism and respiration
RV2386C	mbtI isochorismate synthase intermediary metabolism and respiration
RV3314C	deoA thymidine phosphorylase intermediary metabolism and respiration
RV3441C	mrsA phospho-sugar mutase intermediary metabolism and respiration
RV2499C	oxidase regulatory-related protein intermediary metabolism and respiration
RV3914	trxC thioredoxin intermediary metabolism and respiration
RV2200C	ctaC transmembrane cytochrome C oxidase subunit II intermediary metabolism and respiration
RV2713	sthA soluble pyridine nucleotide transhydrogenase intermediary metabolism and respiration
RV2900C	fdhF formate dehydrogenase H intermediary metabolism and respiration
RV2351C	plcA membrane-associated phospholipase C 1 intermediary metabolism and respiration
RV1524	glycosyltransferase intermediary metabolism and respiration
RV2332	mez NAD-dependent malate oxidoreductase intermediary metabolism and respiration
RV0768	aldA aldehyde dehydrogenase NAD-dependent intermediary metabolism and respiration
RV2334	cysK1 cysteine synthase A intermediary metabolism and respiration
RV3109	moaA1 molybdenum cofactor biosynthesis protein A intermediary metabolism and respiration
RV0802C	conserved hypothetical protein intermediary metabolism and respiration
RV1559	ilvA threonine dehydratase intermediary metabolism and respiration
RV0337C	aspC aspartate aminotransferase intermediary metabolism and respiration
RV0858C	aminotransferase intermediary metabolism and respiration
RV2786C	ribF bifunctional FAD synthetase/riboflavin biosynthesis protein intermediary metabolism and respiration
RV3084	lipR acetyl-hydrolase/esterase intermediary metabolism and respiration
RV1602	hisH amidotransferase intermediary metabolism and respiration
RV1595	nadB L-aspartate oxidase intermediary metabolism and respiration
RV0198C	zinc metalloprotease intermediary metabolism and respiration
RV0694	lldD1 L-lactate dehydrogenase intermediary metabolism and respiration
RV3545C	cyp125 cytochrome P450 125 intermediary metabolism and respiration
RV1320C	adenylate cyclase intermediary metabolism and respiration
RV3148	nuoD NADH dehydrogenase I chain D intermediary metabolism and respiration
RV3206C	moeB1 molybdenum cofactor biosynthesis protein intermediary metabolism and respiration
RV3568C	bphC biphenyl-2,3-diol 1,2-dioxygenase intermediary metabolism and respiration
RV3339C	icd1 isocitrate dehydrogenase intermediary metabolism and respiration
RV3026C	conserved hypothetical protein intermediary metabolism and respiration
RV0382C	pyrE orotate phosphoribosyltransferase intermediary metabolism and respiration
RV0570	nrdZ ribonucleoside-diphosphate reductase large subunit intermediary metabolism and respiration
RV2848C	cobB cobyrinic acid a,c-diamide synthase intermediary metabolism and respiration
RV0663	atsD arylsulfatase intermediary metabolism and respiration
RV3400	hydrolase intermediary metabolism and respiration
RV0462	lpd dihydrolipoamide dehydrogenase intermediary metabolism and respiration
RV3596C	clpC1 ATP-dependent protease ATP-binding subunit intermediary metabolism and respiration
RV0069C	sdaA L-serine dehydratase intermediary metabolism and respiration
RV1666C	cyp139 cytochrome P450 139 intermediary metabolism and respiration
RV0764C	cyp51 cytochrome P450 51 intermediary metabolism and respiration
RV2266	cyp124 cytochrome P450 124 intermediary metabolism and respiration
RV3001C	ilvC ketol-acid reductoisomerase intermediary metabolism and respiration
RV2678C	hemE uroporphyrinogen decarboxylase intermediary metabolism and respiration
RV1360	oxidoreductase intermediary metabolism and respiration
RV2391	nirA ferredoxin-dependent nitrite reductase intermediary metabolism and respiration
RV1121	zwf1 glucose-6-phosphate 1-dehydrogenase intermediary metabolism and respiration
RV0211	pckA iron-regulated phosphoenolpyruvate carboxykinase intermediary metabolism and respiration
RV2535C	pepQ cytoplasmic peptidase intermediary metabolism and respiration
RV1092C	coaA pantothenate kinase intermediary metabolism and respiration
RV1570	bioD dethiobiotin synthetase intermediary metabolism and respiration
RV3537	dehydrogenase intermediary metabolism and respiration
RV2268C	cyp128 cytochrome P450 128 intermediary metabolism and respiration
RV2913C	D-amino acid aminohydrolase intermediary metabolism and respiration
RV0319	pcp pyrrolidone-carboxylate peptidase intermediary metabolism and respiration
RV1653	argJ glutamate n-acetyltransferase intermediary metabolism and respiration
RV2753C	dapA dihydrodipicolinate synthase intermediary metabolism and respiration
RV1384	carB carbamoyl-phosphate synthase large chain intermediary metabolism and respiration
RV2589	gabT 4-aminobutyrate aminotransferase intermediary metabolism and respiration
RV3215	entC isochorismate synthase intermediary metabolism and respiration
RV0423C	thiC thiamine biosynthesis protein intermediary metabolism and respiration
RV3397C	phyA phytoene synthase intermediary metabolism and respiration
RV1785C	cyp143 cytochrome P450 143 intermediary metabolism and respiration
RV2497C	pdhA pyruvate dehydrogenase E1 component alpha subunit intermediary metabolism and respiration
RV2531C	adi amino acid decarboxylase intermediary metabolism and respiration
RV2335	cysE serine acetyltransferase intermediary metabolism and respiration
RV2715	hydrolase intermediary metabolism and respiration
RV1812C	dehydrogenase intermediary metabolism and respiration
RV0734	mapA methionine aminopeptidase intermediary metabolism and respiration
RV3609C	folE GTP cyclohydrolase I intermediary metabolism and respiration
RV3293	pcd piperideine-6-carboxilic acid dehydrogenase intermediary metabolism and respiration
RV2727C	miaA tRNA delta(2)-isopentenylpyrophosphate transferase intermediary metabolism and respiration
RV2461C	clpP1 ATP-dependent clp protease proteolytic subunit 1 intermediary metabolism and respiration
RV2445C	ndkA nucleoside diphosphate kinase intermediary metabolism and respiration
RV0952	sucD succinyl-CoA synthetase alpha chain intermediary metabolism and respiration
RV3536C	hydratase intermediary metabolism and respiration
RV3559C	oxidoreductase intermediary metabolism and respiration
RV3111	moaC molybdenum cofactor biosynthesis protein C moaC1 intermediary metabolism and respiration
RV0561C	oxidoreductase intermediary metabolism and respiration
RV1447C	zwf2 glucose-6-phosphate 1-dehydrogenase intermediary metabolism and respiration
RV3313C	add adenosine deaminase intermediary metabolism and respiration
RV0913C	dioxygenase intermediary metabolism and respiration
RV3671C	membrane-associated serine protease intermediary metabolism and respiration
RV1307	atpH ATP synthase delta chain intermediary metabolism and respiration
RV1412	ribC riboflavin synthase alpha chain intermediary metabolism and respiration
RV3859C	gltB ferredoxin-dependent glutamate synthase large subunit intermediary metabolism and respiration
RV2750	dehydrogenase intermediary metabolism and respiration
RV2218	lipA lipoate biosynthesis protein A intermediary metabolism and respiration
RV2855	mtr NADPH-dependent mycothiol reductase intermediary metabolism and respiration
RV3432C	gadB glutamate decarboxylase intermediary metabolism and respiration
RV3791	short-chain type dehydrogenase/reductase intermediary metabolism and respiration
RV0539	dolichyl-phosphate sugar synthase intermediary metabolism and respiration
RV0896	gltA2 citrate synthase I intermediary metabolism and respiration
RV3158	nuoN NADH dehydrogenase I chain N intermediary metabolism and respiration
RV1449C	tkt transketolase intermediary metabolism and respiration
RV1326C	glgB 1,4-alpha-glucan branching enzyme intermediary metabolism and respiration
RV2579	dhaA haloalkane dehalogenase intermediary metabolism and respiration
RV3049C	monooxygenase intermediary metabolism and respiration
RV0417	thiG thiamin biosynthesis protein intermediary metabolism and respiration
RV1310	atpD ATP synthase beta chain intermediary metabolism and respiration
RV2440C	obg GTP1/obg-family GTP-binding protein intermediary metabolism and respiration
RV1712	cmk cytidylate kinase intermediary metabolism and respiration
RV1394C	cyp132 cytochrome P450 132 intermediary metabolism and respiration
RV1940	ribA1 riboflavin biosynthesis protein intermediary metabolism and respiration
RV0505C	serB1 phosphoserine phosphatase intermediary metabolism and respiration
RV2241	aceE pyruvate dehydrogenase E1 component intermediary metabolism and respiration
RV1077	cbs cystathionine beta-synthase intermediary metabolism and respiration
RV3324C	moaC molybdenum cofactor biosynthesis protein C 3 moaC3 intermediary metabolism and respiration
RV1079	metB cystathionine gamma-synthase intermediary metabolism and respiration
RV2207	cobT nicotinate-nucleotide-dimethylbenzimidazol phosphoribosyltransferase intermediary metabolism and respiration
RV3673C	membrane-anchored thioredoxin intermediary metabolism and respiration
RV2457C	clpX ATP-dependent clp protease ATP-binding subunit intermediary metabolism and respiration
RV2997	alanine rich dehydrogenase intermediary metabolism and respiration
RV0697	dehydrogenase intermediary metabolism and respiration
RV3790	oxidoreductase intermediary metabolism and respiration
RV1552	frdA fumarate reductase flavoprotein subunit intermediary metabolism and respiration
RV0800	pepC aminopeptidase intermediary metabolism and respiration
RV3710	leuA 2-isopropylmalate synthase intermediary metabolism and respiration
RV3607C	folB dihydroneopterin aldolase intermediary metabolism and respiration
RV0136	cyp138 cytochrome P450 138 intermediary metabolism and respiration
RV0610C	hypothetical protein intermediary metabolism and respiration
RV1562C	treZ maltooligosyltrehalose trehalohydrolase intermediary metabolism and respiration
RV3570C	oxidoreductase intermediary metabolism and respiration
RV2350C	plcB membrane-associated phospholipase C 2 intermediary metabolism and respiration
RV3290C	lat L-lysine-epsilon aminotransferase intermediary metabolism and respiration
RV0422C	thiD phosphomethylpyrimidine kinase intermediary metabolism and respiration
RV2201	asnB asparagine synthetase intermediary metabolism and respiration
RV2967C	pca pyruvate carboxylase intermediary metabolism and respiration
RV0946C	pgi glucose-6-phosphate isomerase intermediary metabolism and respiration
RV0945	short-chain type dehydrogenase/reductase intermediary metabolism and respiration
RV3083	monooxygenase intermediary metabolism and respiration
RV1131	gltA1 citrate synthase I intermediary metabolism and respiration
RV2622	methyltransferase/methylase intermediary metabolism and respiration
RV1106C	cholesterol dehydrogenase intermediary metabolism and respiration
RV0500	proC pyrroline-5-carboxylate reductase intermediary metabolism and respiration
RV2368C	phoH1 phosphate starvation-inducible protein intermediary metabolism and respiration
RV2467	pepN aminopeptidase N intermediary metabolism and respiration
RV1850	ureC urease alpha subunit intermediary metabolism and respiration
RV0509	hemA glutamyl-tRNA reductase intermediary metabolism and respiration
RV1436	gap glyceraldehyde 3-phosphate dehydrogenase intermediary metabolism and respiration
RV2073C	short-chain type dehydrogenase intermediary metabolism and respiration
RV0363C	fba fructose-bisphosphate aldolase intermediary metabolism and respiration
RV0032	bioF2 8-amino-7-oxononanoate synthase intermediary metabolism and respiration
RV0654	dioxygenase intermediary metabolism and respiration
RV3696C	glpK glycerol kinase intermediary metabolism and respiration
RV1308	atpA ATP synthase alpha chain intermediary metabolism and respiration
RV0884C	serC phosphoserine aminotransferase intermediary metabolism and respiration
RV1530	adh alcohol dehydrogenase intermediary metabolism and respiration
RV2902C	rnhB ribonuclease HII protein intermediary metabolism and respiration
RV0553	menC muconate cycloisomerase intermediary metabolism and respiration
RV1309	atpG ATP synthase gamma chain intermediary metabolism and respiration
RV2070C	cobK precorrin-6x reductase intermediary metabolism and respiration
RV3377C	cyclase intermediary metabolism and respiration
RV3436C	glmS glucosamine-fructose-6-phosphate aminotransferase intermediary metabolism and respiration
RV0785	conserved hypothetical protein intermediary metabolism and respiration
RV0729	xylB D-xylulose kinase intermediary metabolism and respiration
RV1498C	methyltransferase intermediary metabolism and respiration
RV3150	nuoF NADH dehydrogenase I chain F intermediary metabolism and respiration
RV2065	cobH precorrin-8x methylmutase intermediary metabolism and respiration
RV3389C	dehydrogenase intermediary metabolism and respiration
RV3602C	panC pantoate-beta-alanine ligase intermediary metabolism and respiration
RV1658	argG argininosuccinate synthase intermediary metabolism and respiration
RV3227	aroA 3-phosphoshikimate 1-carboxyvinyltransferase intermediary metabolism and respiration
RV3526	oxidoreductase intermediary metabolism and respiration
RV3406	dioxygenase intermediary metabolism and respiration
RV1880C	cyp140 cytochrome P450 140 intermediary metabolism and respiration
RV0321	dcd deoxycytidine triphosphate deaminase intermediary metabolism and respiration
RV1279	dehydrogenase FAD flavoprotein gmc oxidoreductase intermediary metabolism and respiration
RV1415	ribA2 riboflavin biosynthesis protein intermediary metabolism and respiration
RV0769	dehydrogenase/reductase intermediary metabolism and respiration
RV0408	pta phosphate acetyltransferase intermediary metabolism and respiration
RV3685C	cyp137 cytochrome P450 137 intermediary metabolism and respiration
RV2215	dlaT pyruvate dehydrogenase E2 component sucB intermediary metabolism and respiration
RV0255C	cobQ1 cobyric acid synthase intermediary metabolism and respiration
RV1333	hydrolase intermediary metabolism and respiration
RV0357C	purA adenylosuccinate synthetase intermediary metabolism and respiration
RV0853C	pdc pyruvate or indole-3-pyruvate decarboxylase intermediary metabolism and respiration
RV0956	purN 5-phosphoribosylglycinamide formyltransferase intermediary metabolism and respiration
RV1294	thrA homoserine dehydrogenase intermediary metabolism and respiration
RV3423C	alr alanine racemase intermediary metabolism and respiration
RV0085	hycP hydrogenase intermediary metabolism and respiration
RV0693	pqqE coenzyme pqq synthesis protein E intermediary metabolism and respiration
RV3549C	short-chain type dehydrogenase/reductase intermediary metabolism and respiration
RV3410C	guaB3 inosine-5-monophosphate dehydrogenase intermediary metabolism and respiration
RV1327C	glgE glucanase intermediary metabolism and respiration
RV3275C	purE phosphoribosylaminoimidazole carboxylase catalytic subunit intermediary metabolism and respiration
RV0558	menH ubiquinone/menaquinone biosynthesis methyltransferase intermediary metabolism and respiration
RV3567C	oxidoreductase intermediary metabolism and respiration
RV1594	nadA quinolinate synthetase intermediary metabolism and respiration
RV2276	cyp121 cytochrome P450 121 intermediary metabolism and respiration
RV0773C	ggtA bifunctional acylase intermediary metabolism and respiration
RV2988C	leuC 3-isopropylmalate dehydratase large subunit intermediary metabolism and respiration
RV3396C	guaA GMP synthase intermediary metabolism and respiration
RV2893	oxidoreductase intermediary metabolism and respiration
RV2439C	proB glutamate 5-kinase protein intermediary metabolism and respiration
RV2249C	glpD1 glycerol-3-phosphate dehydrogenase intermediary metabolism and respiration
RV3534C	4-hydroxy-2-oxovalerate aldolase intermediary metabolism and respiration
RV1285	cysD sulfate adenylyltransferase subunit 2 intermediary metabolism and respiration
RV1852	ureG urease accessory protein intermediary metabolism and respiration
RV0780	hemH phosphoribosylaminoimidazole-succinocarboxamide synthase purC intermediary metabolism and respiration
RV3147	nuoC NADH dehydrogenase I chain C intermediary metabolism and respiration
RV1438	tpi triosephosphate isomerase intermediary metabolism and respiration
RV1872C	lldD2 L-lactate dehydrogenase intermediary metabolism and respiration
RV1093	glyA1 serine hydroxymethyltransferase 1 intermediary metabolism and respiration
RV2296	haloalkane dehalogenase intermediary metabolism and respiration
RV0407	fgd1 F420-dependent glucose-6-phosphate dehydrogenase intermediary metabolism and respiration
RV1612	trpB tryptophan synthase, beta subunit intermediary metabolism and respiration
RV0467	icl isocitrate lyase intermediary metabolism and respiration
RV2538C	aroB 3-dehydroquinate synthase intermediary metabolism and respiration
RV3915	cwlM hydrolase intermediary metabolism and respiration
RV0809	purM phosphoribosylformylglycinamidine cyclo-ligase intermediary metabolism and respiration
RV3463	conserved hypothetical protein intermediary metabolism and respiration
RV1525	wbbL2 rhamnosyl transferase intermediary metabolism and respiration
RV3571	hmp hemoglobine-related protein intermediary metabolism and respiration
RV0126	treS trehalose synthase intermediary metabolism and respiration
RV3341	metA homoserine O-acetyltransferase intermediary metabolism and respiration
RV3411C	guaB2 inosine-5-monophosphate dehydrogenase intermediary metabolism and respiration
RV3045	adhC NADP-dependent alcohol dehydrogenase intermediary metabolism and respiration
RV1862	adhA alcohol dehydrogenase intermediary metabolism and respiration
RV0788	purQ phosphoribosylformylglycinamidine synthase I purG intermediary metabolism and respiration
RV1355C	moeY molybdopterin biosynthesis protein intermediary metabolism and respiration
RV0223C	aldehyde dehydrogenase intermediary metabolism and respiration
RV3230C	oxidoreductase intermediary metabolism and respiration
RV3853	menG S-adenosylmethionine:2-demethylmenaquinone methyltransferase intermediary metabolism and respiration
RV3569C	bphD 2-hydroxy-6-oxo-6-phenylhexa-2,4-dienoate hydrolase intermediary metabolism and respiration
RV3913	trxB2 thioredoxin reductase intermediary metabolism and respiration
RV0808	purF amidophosphoribosyltransferase intermediary metabolism and respiration
RV3306C	amiB1 amidohydrolase intermediary metabolism and respiration
RV1328	glgP glycogen phosphorylase intermediary metabolism and respiration
RV3247C	tmk thymidylate kinase intermediary metabolism and respiration
RV0897C	oxidoreductase intermediary metabolism and respiration
RV2918C	glnD protein-pii uridylyltransferase intermediary metabolism and respiration
RV1213	glgC glucose-1-phosphate adenylyltransferase intermediary metabolism and respiration
RV0815C	cysA2 thiosulfate sulfurtransferase intermediary metabolism and respiration
RV0951	sucC succinyl-CoA synthetase beta chain intermediary metabolism and respiration
RV2221C	glnE glutamate-ammonia-ligase adenylyltransferase intermediary metabolism and respiration
RV2610C	pimA alpha-mannosyltransferase intermediary metabolism and respiration
RV0484C	short-chain type oxidoreductase intermediary metabolism and respiration
RV3303C	lpdA dihydrolipoamide dehydrogenase intermediary metabolism and respiration
RV2996C	serA1 D-3-phosphoglycerate dehydrogenase intermediary metabolism and respiration
RV3464	rmlB dTDP-glucose 4,6-dehydratase intermediary metabolism and respiration
RV1617	pykA pyruvate kinase intermediary metabolism and respiration
RV1373	glycolipid sulfotransferase intermediary metabolism and respiration
RV2121C	hisG ATP phosphoribosyltransferase intermediary metabolism and respiration
RV1264	adenylyl cyclase intermediary metabolism and respiration
RV2195	qcrA Rieske iron-sulfur protein intermediary metabolism and respiration
RV1108C	xseA exodeoxyribonuclease VII large subunit intermediary metabolism and respiration
RV0864	moaC molybdenum cofactor biosynthesis protein C 2 moaC2 intermediary metabolism and respiration
RV1485	hemZ ferrochelatase intermediary metabolism and respiration
RV2213	pepB aminopeptidase intermediary metabolism and respiration
RV1771	oxidoreductase intermediary metabolism and respiration
RV3838C	pheA prephenate dehydratase intermediary metabolism and respiration
RV1399C	lipH lipase intermediary metabolism and respiration
RV3279C	birA bifunctional biotin biosynthesis protein intermediary metabolism and respiration
RV1383	carA carbamoyl-phosphate synthase small chain intermediary metabolism and respiration
RV0751C	mmsB 3-hydroxyisobutyrate dehydrogenase intermediary metabolism and respiration
RV0162C	adhE1 zinc-type alcohol dehydrogenase E subunit adhE intermediary metabolism and respiration
RV3535C	acetaldehyde dehydrogenase intermediary metabolism and respiration
RV2773C	dapB dihydrodipicolinate reductase intermediary metabolism and respiration
RV3264C	manB D-alpha-D-mannose-1-phosphate guanylyltransferase intermediary metabolism and respiration
RV2202C	cbhK carbohydrate kinase intermediary metabolism and respiration
RV2962C	glycosyltransferase intermediary metabolism and respiration
RV0542C	menE O-succinylbenzoic acid-CoA ligase intermediary metabolism and respiration
RV3002C	ilvN acetolactate synthase small subunit intermediary metabolism and respiration
RV0568	cyp135B1 cytochrome P450 135B1 intermediary metabolism and respiration
RV0886	fprB NADPH:adrenodoxin oxidoreductase intermediary metabolism and respiration
RV2496C	pdhB pyruvate dehydrogenase E1 component beta subunit intermediary metabolism and respiration
RV1248C	kgd 2-oxoglutarate dehydrogenase sucA intermediary metabolism and respiration
RV0070C	glyA2 serine hydroxymethyltransferase 2 intermediary metabolism and respiration
RV2404C	lepA GTP-binding protein intermediary metabolism and respiration
RV3146	nuoB NADH dehydrogenase I chain B intermediary metabolism and respiration
RV1731	gabD2 succinate-semialdehyde dehydrogenase [NADP+]-dependent intermediary metabolism and respiration
RV2220	glnA1 glutamine synthetase intermediary metabolism and respiration
RV3003C	ilvB1 acetolactate synthase large subunit intermediary metabolism and respiration
RV3028C	fixB electron transfer flavoprotein alpha subunit intermediary metabolism and respiration
RV1781C	malQ 4-alpha-glucanotransferase intermediary metabolism and respiration
RV1613	trpA tryptophan synthase, alpha subunit intermediary metabolism and respiration
RV0777	purB adenylosuccinate lyase intermediary metabolism and respiration
RV0733	adk adenylate kinase intermediary metabolism and respiration
RV1207	folP2 dihydropteroate synthase 2 intermediary metabolism and respiration
RV1699	pyrG CTP synthase intermediary metabolism and respiration
RV3487C	lipF esterase/lipase intermediary metabolism and respiration
RV1409	ribG riboflavin biosynthesis protein intermediary metabolism and respiration
RV3628	ppa inorganic pyrophosphatase intermediary metabolism and respiration
RV2363	amiA2 amidase intermediary metabolism and respiration
RV0334	rmlA alpha-D-glucose-1-phosphate thymidylyltransferase intermediary metabolism and respiration
RV1538C	ansA L-aparaginase intermediary metabolism and respiration
RV0770	dehydrogenase/reductase intermediary metabolism and respiration
RV2957	glycosyltransferase intermediary metabolism and respiration
RV0765C	oxidoreductase intermediary metabolism and respiration
RV1736C	narX nitrate reductase intermediary metabolism and respiration
RV3170	aofH flavin-containing monoamine oxidase intermediary metabolism and respiration
RV3551	CoA-transferase alpha subunit intermediary metabolism and respiration
RV2427C	proA gamma-glutamyl phosphate reductase protein intermediary metabolism and respiration
RV1563C	treY maltooligosyltrehalose synthase intermediary metabolism and respiration
RV2781C	alanine rich oxidoreductase intermediary metabolism and respiration
RV1202	dapE succinyl-diaminopimelate desuccinylase intermediary metabolism and respiration
RV2977C	thiL thiamine-monophosphate kinase intermediary metabolism and respiration
RV3265C	wbbL1 dTDP-rha:a-D-glcnac-diphosphoryl polyprenol, a-3-L-rhamnosyl transferase intermediary metabolism and respiration
RV0189C	ilvD dihydroxy-acid dehydratase intermediary metabolism and respiration
RV2124C	metH 5-methyltetrahydrofolate-homocystein methyltransferase intermediary metabolism and respiration
RV2667	clpC2 ATP-dependent protease ATP-binding subunit intermediary metabolism and respiration
RV1144	short-chain type dehydrogenase/reductase intermediary metabolism and respiration
RV2089C	pepE dipeptidase intermediary metabolism and respiration
RV0492C	oxidoreductase gmc-type intermediary metabolism and respiration
RV3010C	pfkA 6-phosphofructokinase intermediary metabolism and respiration
RV0391	metZ O-succinylhomoserine sulfhydrylase intermediary metabolism and respiration
RV1363C	membrane protein conserved hypotheticals
RV1488	conserved hypothetical protein conserved hypotheticals
RV2389C	rpfD resuscitation-promoting factor conserved hypotheticals
RV1224	tatB hypothetical protein conserved hypotheticals
RV0813C	conserved hypothetical protein conserved hypotheticals
RV2609C	conserved membrane protein conserved hypotheticals
RV2450C	rpfE resuscitation-promoting factor conserved hypotheticals
RV0822C	conserved hypothetical protein conserved hypotheticals
RV2361C	long-chain (C50)-Z-isoprenyl diphosphate synthase conserved hypotheticals
RV2759C	conserved hypothetical protein conserved hypotheticals
RV1830	conserved hypothetical protein conserved hypotheticals
RV0019C	conserved hypothetical protein conserved hypotheticals
RV2879C	conserved hypothetical protein conserved hypotheticals
RV2511	orn oligoribonuclease conserved hypotheticals
RV0574C	conserved hypothetical protein conserved hypotheticals
RV2300C	conserved hypothetical protein conserved hypotheticals
RV2870C	dxr 1-deoxy-D-xylulose 5-phosphate reductoisomerase conserved hypotheticals
RV1173	fbiC F420 biosynthesis protein conserved hypotheticals
RV2100	conserved hypothetical protein conserved hypotheticals
RV1201C	transferase conserved hypotheticals
RV2631	conserved hypothetical protein conserved hypotheticals
RV2585C	conserved lipoprotein conserved hypotheticals
RV3529C	conserved hypothetical protein conserved hypotheticals
RV1631	coaE dephospho-CoA kinase conserved hypotheticals
RV3672C	conserved hypothetical protein conserved hypotheticals
RV1710	conserved hypothetical protein conserved hypotheticals
RV3734C	conserved hypothetical protein conserved hypotheticals
RV2880C	conserved hypothetical protein conserved hypotheticals
RV0284	conserved membrane protein conserved hypotheticals
RV0626	conserved hypothetical protein conserved hypotheticals
RV0895	conserved hypothetical protein conserved hypotheticals
RV3024C	trmU tRNA (5-methylaminomethyl-2-thiouridylate)-methyltransferase conserved hypotheticals
RV1729C	conserved hypothetical protein conserved hypotheticals
RV2966C	methyltransferase/methylase conserved hypotheticals
RV1422	conserved hypothetical protein conserved hypotheticals
RV3361C	conserved hypothetical protein conserved hypotheticals
RV1700	conserved hypothetical protein conserved hypotheticals
RV1247C	conserved hypothetical protein conserved hypotheticals
RV1993C	conserved hypothetical protein conserved hypotheticals
RV3000	conserved membrane protein conserved hypotheticals
RV0022C	whiB5 transcriptional regulator whib-like conserved hypotheticals
RV1284	conserved hypothetical protein conserved hypotheticals
RV1241	conserved hypothetical protein conserved hypotheticals
RV1462	conserved hypothetical protein conserved hypotheticals
RV2522C	conserved hypothetical protein conserved hypotheticals
RV0597C	conserved hypothetical protein conserved hypotheticals
RV2362C	recO conserved hypothetical protein conserved hypotheticals
RV0874C	conserved hypothetical protein conserved hypotheticals
RV1495	conserved hypothetical protein conserved hypotheticals
RV1128C	conserved hypothetical protein insertion seqs and phages
RV2842C	conserved hypothetical protein conserved hypotheticals
RV2149C	yfiH hypothetical protein conserved hypotheticals
RV1021	conserved hypothetical protein conserved hypotheticals
RV2165C	mraW conserved hypothetical protein conserved hypotheticals
RV0665	conserved hypothetical protein conserved hypotheticals
RV0036C	conserved hypothetical protein conserved hypotheticals
RV3466	conserved hypothetical protein insertion seqs and phages
RV0091	mtn bifunctional nucleosidase conserved hypotheticals
RV2823C	conserved hypothetical protein conserved hypotheticals
RV1063C	conserved hypothetical protein conserved hypotheticals
RV1959C	conserved hypothetical protein conserved hypotheticals
RV1246C	conserved hypothetical protein conserved hypotheticals
RV0046C	ino1 myo-inositol-1-phosphate synthase conserved hypotheticals
RV1783	conserved membrane protein conserved hypotheticals
RV2285	conserved hypothetical protein conserved hypotheticals
RV2778C	conserved hypothetical protein conserved hypotheticals
RV2638	conserved hypothetical protein conserved hypotheticals
RV2868C	gcpE 4-hydroxy-3-methylbut-2-en-1-yl diphosphate synthase conserved hypotheticals
RV0025	conserved hypothetical protein conserved hypotheticals
RV2096C	conserved hypothetical protein conserved hypotheticals
RV0020C	TB39.8 conserved hypothetical protein conserved hypotheticals
RV2557	conserved hypothetical protein conserved hypotheticals
RV3778C	aminotransferase conserved hypotheticals
RV0624	conserved hypothetical protein conserved hypotheticals
RV1745C	idi isopentenyl-diphosphate delta-isomerase conserved hypotheticals
RV0342	iniA isoniazid inductible gene protein conserved hypotheticals
RV0774C	hypothetical exported protein conserved hypotheticals
RV3076	conserved hypothetical protein conserved hypotheticals
RV0127	conserved hypothetical protein conserved hypotheticals
RV2407	conserved hypothetical protein conserved hypotheticals
RV0038	conserved hypothetical protein conserved hypotheticals
RV2166C	conserved hypothetical protein conserved hypotheticals
RV3876	conserved alanine and proline rich protein conserved hypotheticals
RV3895C	conserved membrane protein conserved hypotheticals
RV2421C	nadD nicotinate-nucleotide adenylyltransferase conserved hypotheticals
RV2005C	conserved hypothetical protein conserved hypotheticals
RV2325C	conserved hypothetical protein conserved hypotheticals
RV2298	conserved hypothetical protein conserved hypotheticals
RV2718C	conserved hypothetical protein conserved hypotheticals
RV1011	ispE 4-diphosphocytidyl-2-C-methyl-D-erythritol kinase conserved hypotheticals
RV3131	conserved hypothetical protein conserved hypotheticals
RV2230C	conserved hypothetical protein conserved hypotheticals
RV2821C	conserved hypothetical protein conserved hypotheticals
RV0146	conserved hypothetical protein conserved hypotheticals
RV2030C	conserved hypothetical protein conserved hypotheticals
RV2032	acg hypothetical protein conserved hypotheticals
RV2104C	conserved hypothetical protein conserved hypotheticals
RV2366C	conserved membrane protein conserved hypotheticals
RV2993C	2-hydroxyhepta-2,4-diene-1,7-dioate isomerase conserved hypotheticals
RV1592C	conserved hypothetical protein conserved hypotheticals
RV3342	methyltransferase/methylase conserved hypotheticals
RV2800	hydrolase conserved hypotheticals
RV1312	conserved secreted protein conserved hypotheticals
RV0004	conserved hypothetical protein conserved hypotheticals
RV0669C	hydrolase conserved hypotheticals
RV1695	ppnK inorganic polyphosphate/ATP-NAD kinase conserved hypotheticals
RV3384C	conserved hypothetical protein conserved hypotheticals
RV3866	conserved hypothetical protein conserved hypotheticals
RV1208	conserved hypothetical protein conserved hypotheticals
RV3707C	conserved hypothetical protein conserved hypotheticals
RV3074	conserved hypothetical protein conserved hypotheticals
RV2008C	conserved hypothetical protein conserved hypotheticals
RV2865	conserved hypothetical protein conserved hypotheticals
RV2559C	conserved alanine, leucine valine rich protein conserved hypotheticals
RV2897C	conserved hypothetical protein conserved hypotheticals
RV1009	rpfB resuscitation-promoting factor conserved hypotheticals
RV2743C	conserved alanine rich membrane protein conserved hypotheticals
RV2757C	conserved hypothetical protein conserved hypotheticals
RV2927C	conserved hypothetical protein conserved hypotheticals
RV3908	conserved hypothetical protein conserved hypotheticals
RV2606C	pyridoxine biosynthesis protein conserved hypotheticals
RV2086	conserved hypothetical protein insertion seqs and phages
RV3088	conserved hypothetical protein conserved hypotheticals
RV0283	conserved membrane protein conserved hypotheticals
RV2676C	conserved hypothetical protein conserved hypotheticals
RV0496	conserved hypothetical protein conserved hypotheticals
RV3767C	conserved hypothetical protein conserved hypotheticals
RV3261	fbiA F420 biosynthesis protein conserved hypotheticals
RV2837C	conserved hypothetical protein conserved hypotheticals
RV1896C	conserved hypothetical protein conserved hypotheticals
RV2604C	conserved hypothetical protein conserved hypotheticals
RV2212	conserved hypothetical protein conserved hypotheticals
RV1943C	conserved hypothetical protein conserved hypotheticals
RV2625C	conserved alanine and leucine rich membrane protein conserved hypotheticals
RV3882C	conserved membrane protein conserved hypotheticals
RV1636	TB15.3 iron-regulated conserved hypothetical protein conserved hypotheticals
RV0799C	conserved hypothetical protein conserved hypotheticals
RV2095C	conserved hypothetical protein conserved hypotheticals
RV0805	conserved hypothetical protein conserved hypotheticals
RV0208C	trmB methlytransferase conserved hypotheticals
RV0130	conserved hypothetical protein conserved hypotheticals
RV3776	conserved hypothetical protein conserved hypotheticals
RV1998C	conserved hypothetical protein conserved hypotheticals
RV2216	conserved hypothetical protein conserved hypotheticals
RV0566C	conserved hypothetical protein conserved hypotheticals
RV0623	conserved hypothetical protein conserved hypotheticals
RV1229C	mrp hypothetical protein conserved hypotheticals
RV2510C	conserved hypothetical protein conserved hypotheticals
RV2240C	hypothetical protein conserved hypotheticals
RV2670C	conserved hypothetical protein conserved hypotheticals
RV1797	conserved hypothetical protein conserved hypotheticals
RV1711	conserved hypothetical protein conserved hypotheticals
RV0731C	conserved hypothetical protein conserved hypotheticals
RV0433	conserved hypothetical protein conserved hypotheticals
RV3376	conserved hypothetical protein conserved hypotheticals
RV3480C	conserved hypothetical protein conserved hypotheticals
RV3683	conserved hypothetical protein conserved hypotheticals
RV0804	conserved hypothetical protein conserved hypotheticals
RV3870	conserved membrane protein conserved hypotheticals
RV1480	conserved hypothetical protein conserved hypotheticals
RV2758C	conserved hypothetical protein conserved hypotheticals
RV0748	conserved hypothetical protein conserved hypotheticals
RV2910C	conserved hypothetical protein conserved hypotheticals
RV2817C	conserved hypothetical protein conserved hypotheticals
RV2721C	conserved alanine and glycine rich membrane protein conserved hypotheticals
RV3869	conserved membrane protein conserved hypotheticals
RV3884C	cbxX/cfqX family protein conserved hypotheticals
RV2627C	conserved hypothetical protein conserved hypotheticals
RV2402	conserved hypothetical protein conserved hypotheticals
RV0726C	conserved hypothetical protein conserved hypotheticals
RV2698	conserved alanine rich membrane protein conserved hypotheticals
RV2611C	acyltransferase conserved hypotheticals
RV1558	conserved hypothetical protein conserved hypotheticals
RV3168	conserved hypothetical protein conserved hypotheticals
RV0007	conserved membrane protein conserved hypotheticals
RV2828C	conserved hypothetical protein conserved hypotheticals
RV2148C	conserved hypothetical protein conserved hypotheticals
RV1262C	hypothetical protein conserved hypotheticals
RV3510C	conserved hypothetical protein conserved hypotheticals
RV3760	conserved membrane protein conserved hypotheticals
RV1782	conserved membrane protein conserved hypotheticals
RV1996	conserved hypothetical protein conserved hypotheticals
RV2417C	conserved hypothetical protein conserved hypotheticals
RV3712	ligase conserved hypotheticals
RV2840C	conserved hypothetical protein conserved hypotheticals
RV0026	conserved hypothetical protein conserved hypotheticals
RV2733C	conserved alanine and arginine rich protein conserved hypotheticals
RV2565	conserved hypothetical protein conserved hypotheticals
RV0502	conserved hypothetical protein conserved hypotheticals
RV3292	conserved hypothetical protein conserved hypotheticals
RV0106	conserved hypothetical protein conserved hypotheticals
RV3282	maf conserved hypothetical protein conserved hypotheticals
RV0659C	conserved hypothetical protein conserved hypotheticals
RV1357C	conserved hypothetical protein conserved hypotheticals
RV2953	conserved hypothetical protein conserved hypotheticals
RV2624C	conserved hypothetical protein conserved hypotheticals
RV0893C	conserved hypothetical protein conserved hypotheticals
RV0097	oxidoreductase conserved hypotheticals
RV1314C	conserved hypothetical protein conserved hypotheticals
RV1375	conserved hypothetical protein conserved hypotheticals
RV2744C	35kd_ag conserved alanine rich protein conserved hypotheticals
RV1461	conserved hypothetical protein conserved hypotheticals
RV1261C	conserved hypothetical protein conserved hypotheticals
RV2681	conserved alanine rich protein conserved hypotheticals
RV2411C	conserved hypothetical protein conserved hypotheticals
RV2719C	conserved membrane protein conserved hypotheticals
RV0281	conserved hypothetical protein conserved hypotheticals
RV2286C	conserved hypothetical protein conserved hypotheticals
RV3868	conserved hypothetical protein conserved hypotheticals
RV0282	conserved hypothetical protein conserved hypotheticals
RV0910	conserved hypothetical protein conserved hypotheticals
RV3401	conserved hypothetical protein conserved hypotheticals
RV2307C	conserved hypothetical protein conserved hypotheticals
RV3740C	conserved hypothetical protein conserved hypotheticals
RV1834	hydrolase conserved hypotheticals
RV3688C	conserved hypothetical protein conserved hypotheticals
RV2696C	conserved alanine, glycine and valine rich protein conserved hypotheticals
RV0164	TB18.5 conserved hypothetical protein conserved hypotheticals
RV0968	conserved hypothetical protein conserved hypotheticals
RV0811C	conserved hypothetical protein conserved hypotheticals
RV2567	conserved alanine and leucine rich protein conserved hypotheticals
RV2188C	conserved hypothetical protein conserved hypotheticals
RV2252	conserved hypothetical protein conserved hypotheticals
RV1798	conserved hypothetical protein conserved hypotheticals
RV2047C	conserved hypothetical protein conserved hypotheticals
RV1425	conserved hypothetical protein conserved hypotheticals
RV2862C	conserved hypothetical protein conserved hypotheticals
RV1003	conserved hypothetical protein conserved hypotheticals
RV3408	conserved hypothetical protein conserved hypotheticals
RV0343	iniC isoniazid inductible gene protein conserved hypotheticals
RV2632C	conserved hypothetical protein conserved hypotheticals
RV3639C	conserved hypothetical protein conserved hypotheticals
RV2347C	esxP Esat-6 like protein conserved hypotheticals
RV0919	conserved hypothetical protein conserved hypotheticals
RV2974C	conserved alanine rich protein conserved hypotheticals
RV1496	arginine/ornithine transport system ATPase conserved hypotheticals
RV0444C	conserved hypothetical protein conserved hypotheticals
RV3433C	conserved hypothetical protein conserved hypotheticals
RV1835C	conserved hypothetical protein conserved hypotheticals
RV3787C	conserved hypothetical protein conserved hypotheticals
RV2140C	TB18.6 conserved hypothetical protein conserved hypotheticals
RV3030	conserved hypothetical protein conserved hypotheticals
RV2917	conserved alanine and arginine rich protein conserved hypotheticals
RV1713	engA GTP-binding protein conserved hypotheticals
RV3262	fbiB F420 biosynthesis protein conserved hypotheticals
RV2754C	thyX thymidylate synthase conserved hypotheticals
RV1078	pra proline-rich antigen conserved hypotheticals
RV1421	conserved hypothetical protein conserved hypotheticals
RV3357	conserved hypothetical protein conserved hypotheticals
RV3385C	conserved hypothetical protein conserved hypotheticals
RV3438	conserved hypothetical protein conserved hypotheticals
RV2571C	transmembrane alanine and valine and leucine rich protein conserved hypotheticals
RV0880	transcriptional regulator, marR-family conserved hypotheticals
RV3127	conserved hypothetical protein conserved hypotheticals
RV0216	conserved hypothetical protein conserved hypotheticals
RV2547	conserved hypothetical protein conserved hypotheticals
RV0557	pimB mannosyltransferase conserved hypotheticals
RV1287	conserved hypothetical protein conserved hypotheticals
RV2449C	conserved hypothetical protein conserved hypotheticals
RV3371	conserved hypothetical protein conserved hypotheticals
RV3633	conserved hypothetical protein conserved hypotheticals
RV2569C	conserved hypothetical protein conserved hypotheticals
RV3701C	conserved hypothetical protein conserved hypotheticals
RV2530C	conserved hypothetical protein conserved hypotheticals
RV2752C	conserved hypothetical protein conserved hypotheticals
RV2949C	conserved hypothetical protein unknown
RV0959	conserved hypothetical protein unknown
RV1955	hypothetical protein unknown
RV1259	conserved hypothetical protein unknown
RV3808C	glfT bifunctional UDP-galactofuranosyl transferase unknown
RV3849	conserved hypothetical protein unknown
RV2819C	hypothetical protein unknown
RV3528C	hypothetical protein unknown
RV2004C	conserved hypothetical protein unknown
RV1995	hypothetical protein unknown
RV2636	conserved hypothetical protein unknown
RV3033	hypothetical protein unknown
RV2297	hypothetical protein unknown
RV3594	conserved hypothetical protein unknown
RV0762C	conserved hypothetical protein unknown
RV2074	conserved hypothetical protein unknown
RV3403C	hypothetical protein unknown
RV3035	conserved hypothetical protein unknown
RV0887C	conserved hypothetical protein unknown
RV2476C	gdh NAD-dependent glutamate dehydrogenase unknown
RV2570	conserved hypothetical protein unknown
RV3413C	hypothetical alanine and proline rich protein unknown
RV0508	conserved hypothetical protein unknown
RV2954C	hypothetical protein unknown
RV0612	conserved hypothetical protein unknown
RV3718C	conserved hypothetical protein unknown
RV0662C	conserved hypothetical protein unknown
RV2731	conserved alanine and arginine rich protein unknown
RV0572C	hypothetical protein unknown
RV2734	conserved hypothetical protein unknown
RV0499	conserved hypothetical protein unknown
RV0299	hypothetical protein unknown
RV3889C	hypothetical protein unknown
RV2468C	conserved hypothetical protein unknown
RV2772C	conserved membrane protein unknown
RV3662C	conserved hypothetical protein unknown
RV2142C	hypothetical protein unknown
RV3885C	conserved membrane protein unknown
RV2990C	hypothetical protein unknown
RV0998	conserved hypothetical protein unknown
RV0584	hypothetical exported protein unknown
RV2305	hypothetical protein unknown
RV2275	conserved hypothetical protein unknown
RV1414	conserved hypothetical protein unknown
RV1265	hypothetical protein unknown
RV2633C	hypothetical protein unknown
RV0088	hypothetical protein unknown
RV2491	conserved hypothetical protein unknown
RV2525C	conserved hypothetical protein unknown
RV2630	hypothetical protein unknown
RV1268C	hypothetical protein unknown
RV2891	conserved hypothetical protein unknown
RV2617C	transmembrane protein unknown
RV2515C	conserved hypothetical protein unknown
RV0789C	hypothetical protein unknown
RV0257C	hypothetical protein unknown
RV2516C	hypothetical protein unknown
RV1155	conserved hypothetical protein unknown
RV3126C	hypothetical protein unknown
RV2084	hypothetical protein unknown
RV2735C	conserved hypothetical protein unknown
RV0743C	hypothetical protein unknown
RV3651	conserved hypothetical protein unknown
RV1885C	conserved hypothetical protein unknown
RV1898	conserved hypothetical protein unknown
RV2075C	hypothetical exported protein unknown
RV2229C	conserved hypothetical protein unknown
RV0057	hypothetical protein unknown
RV3395C	conserved hypothetical protein unknown
RV2331	hypothetical protein unknown
RV3038C	conserved hypothetical protein unknown
RV0767C	conserved hypothetical protein unknown
RV2453C	mobA molybdopterin-guanine dinucleotide biosynthesis protein A unknown
RV1351	hypothetical protein unknown
RV1290C	conserved hypothetical protein unknown
RV3818	hypothetical protein unknown
RV2803C	hypothetical protein unknown
RV2597	membrane protein unknown
RV3493C	MCE-associated alanine and valine rich protein unknown
RV0090	membrane protein unknown
RV0678	conserved hypothetical protein unknown
RV3091	conserved hypothetical protein unknown
RV2820C	hypothetical protein unknown
RV0048C	membrane protein unknown
RV2844	conserved alanine rich protein unknown
RV2578C	conserved hypothetical protein unknown
RV0582	hypothetical protein unknown
RV2242	conserved hypothetical protein unknown
RV3037C	conserved hypothetical protein unknown
RV1413	conserved hypothetical protein unknown
RV0079	hypothetical protein unknown
RV3780	conserved hypothetical protein unknown
RV3552	CoA-transferase beta subunit unknown
RV2867C	conserved hypothetical protein unknown
RV3879C	hypothetical alanine and proline rich protein unknown
RV1322	conserved hypothetical protein unknown
RV2228C	conserved hypothetical protein unknown
RV3542C	conserved hypothetical protein unknown
RV0104	conserved hypothetical protein unknown
RV0250C	conserved hypothetical protein unknown
RV0925C	conserved hypothetical protein unknown
RV1509	hypothetical protein unknown
RV2000	hypothetical protein unknown
RV2311	conserved hypothetical protein unknown
RV3647C	conserved hypothetical protein unknown
RV1825	conserved hypothetical protein unknown
RV2761C	hsdS Type I restriction/modification system specificity determinant unknown
RV0690C	conserved hypothetical protein unknown
RV0964C	hypothetical protein unknown
RV2012	conserved hypothetical protein unknown
RV2235	conserved membrane protein unknown
RV2553C	conserved membrane protein unknown
RV0837C	hypothetical protein unknown
RV2219	conserved membrane protein unknown
RV0923C	conserved hypothetical protein unknown
RV0117	oxyS oxidative stress response regulatory protein regulatory proteins
RV2027C	histidine kinase response regulator regulatory proteins
RV3765C	two component system transcriptional regulator regulatory proteins
RV0494	transcriptional regulator, gntR-family regulatory proteins
RV2711	ideR iron-dependent repressor and activator regulatory proteins
RV3245C	mtrB two component system sensor histidine kinase regulatory proteins
RV3764C	two component system sensor kinase regulatory proteins
RV0485	transcriptional regulator regulatory proteins
RV2034	arsR-type repressor protein regulatory proteins
RV1675C	transcriptional regulator regulatory proteins
RV0823C	transcriptional regulator regulatory proteins
RV0600C	two component system sensor kinase regulatory proteins
RV3744	transcriptional regulator, arsR-family regulatory proteins
RV3405C	transcriptional regulator regulatory proteins
RV2912C	transcriptional regulator, tetR-family regulatory proteins
RV1359	transcriptional regulator regulatory proteins
RV0890C	transcriptional regulator, luxR-family regulatory proteins
RV0023	transcriptional regulator regulatory proteins
RV1267C	embR transcriptional regulator regulatory proteins
RV2175C	conserved hypothetical protein regulatory proteins
RV1049	transcriptional repressor regulatory proteins
RV2914C	pknI transmembrane serine/threonine-protein kinase I regulatory proteins
RV3557C	transcriptional regulator, tetR-family regulatory proteins
RV2884	transcriptional regulator regulatory proteins
RV3080C	pknK serine/threonine-protein kinase transcriptional regulator regulatory proteins
RV1994C	transcriptional regulator regulatory proteins
RV3291C	transcriptional regulator, asnC-family regulatory proteins
RV0931C	pknD transmembrane serine/threonine-protein kinase D regulatory proteins
RV2234	ptpA phosphotyrosine protein phosphatase regulatory proteins
RV0196	transcriptional regulator regulatory proteins
RV0894	transcriptional regulator, luxR-family regulatory proteins
RV0586	transcriptional regulator, gntR-family regulatory proteins
RV1033C	trcR two component system transcriptional regulator regulatory proteins
RV0903C	prrA two component system transcriptional regulator regulatory proteins
RV0982	mprB two component system sensor kinase regulatory proteins
RV1626	two component system transcriptional regulator regulatory proteins
RV3143	response regulator regulatory proteins
RV2720	lexA repressor regulatory proteins
RV2745C	transcriptional regulator regulatory proteins
RV3692	moxR2 methanol dehydrogenase transcriptional regulator regulatory proteins
RV3855	ethR tetR-family transcriptional repressor regulatory proteins
RV0410C	pknG serine/threonine-protein kinase regulatory proteins
RV2621C	transcriptional regulator regulatory proteins
RV1846C	transcriptional regulator regulatory proteins
RV1816	transcriptional regulator regulatory proteins
RV0737	transcriptional regulator regulatory proteins
RV1332	transcriptional regulator regulatory proteins
RV3132C	devS two component system sensor histidine kinase regulatory proteins
RV1395	transcriptional regulator regulatory proteins
RV0153C	ptbB phosphotyrosine protein phosphatase ptpb regulatory proteins
RV3133C	devR two component system transcriptional regulator regulatory proteins
RV2088	pknJ transmembrane serine/threonine-protein kinase J regulatory proteins
RV0902C	prrB two component system sensor histidine kinase regulatory proteins
RV1266C	pknH transmembrane serine/threonine-protein kinase H regulatory proteins
RV1027C	kdpE transcriptional regulator regulatory proteins
RV0043C	transcriptional regulator, gntR-family regulatory proteins
RV3095	transcriptional regulator regulatory proteins
RV3583C	transcriptional regulator regulatory proteins
RV3676	transcriptional regulator, crp/fnr-family regulatory proteins
RV2669	conserved hypothetical protein regulatory proteins
RV1556	regulatory protein regulatory proteins
RV1423	whiA transcriptional regulator regulatory proteins
RV0465C	transcriptional regulator regulatory proteins
RV0845	two component system sensor kinase regulatory proteins
RV0602C	tcrA two component system transcriptional regulator regulatory proteins
RV1985C	transcriptional regulator, lysR-family regulatory proteins
RV3066	transcriptional regulator, deoR-family regulatory proteins
RV0827C	transcriptional regulator regulatory proteins
RV2282C	transcriptional regulator, lysR-family regulatory proteins
RV3050C	transcriptional regulator, asnC-family regulatory proteins
RV1353C	transcriptional regulator regulatory proteins
RV2788	sirR transcriptional repressor regulatory proteins
RV1379	pyrR pyrimidine operon regulatory protein regulatory proteins
RV1743	pknE transmembrane serine/threonine-protein kinase E regulatory proteins
RV2308	conserved hypothetical protein regulatory proteins
RV0014C	pknB transmembrane serine/threonine-protein kinase B regulatory proteins
RV0490	senX3 two component system sensor histidine kinase regulatory proteins
RV1080C	greA transcription elongation factor information pathways
RV3456C	rplQ 50S ribosomal protein L17 information pathways
RV0056	rplI 50S ribosomal protein L9 information pathways
RV1317C	alkA ada regulatory protein information pathways
RV0702	rplD 50S ribosomal protein L4 information pathways
RV1406	fmt methionyl-tRNA formyltransferase information pathways
RV2357C	glyS glycyl-tRNA synthetase information pathways
RV0001	dnaA chromosomal replication initiator protein information pathways
RV2594C	ruvC crossover junction endodeoxyribonuclease information pathways
RV2793C	truB tRNA pseudouridine synthase B information pathways
RV1547	dnaE1 DNA polymerase III alpha chain information pathways
RV3834C	serS seryl-tRNA synthetase information pathways
RV2572C	aspS aspartyl-tRNA synthetase information pathways
RV0714	rplN 50S ribosomal protein L14 information pathways
RV1010	ksgA dimethyladenosine transferase information pathways
RV3420C	rimI ribosomal-protein-alanine acetyltransferase information pathways
RV3443C	rplM 50S ribosomal protein L13 information pathways
RV0058	dnaB replicative DNA helicase information pathways
RV3014C	ligA NAD-dependent DNA ligase information pathways
RV3370C	dnaE2 DNA polymerase III alpha chain information pathways
RV2736C	recX regulatory protein information pathways
RV2890C	rpsB 30S ribosomal protein S2 information pathways
RV1536	ileS isoleucyl-tRNA synthetase information pathways
RV1696	recN DNA repair protein information pathways
RV0735	sigL alternative RNA polymerase sigma factor information pathways
RV2985	mutT1 hydrolase information pathways
RV1420	uvrC excinuclease ABC subunit C information pathways
RV3589	mutY adenine glycosylase information pathways
RV3455C	truA tRNA pseudouridine synthase A information pathways
RV0707	rpsC 30S ribosomal protein S3 information pathways
RV2841C	nusA N utilization substance protein A information pathways
RV2783C	gpsI bifunctional polyribonucleotide nucleotidyltransferase information pathways
RV1020	mfd transcription-repair coupling factor information pathways
RV0652	rplL 50S ribosomal protein L7/L12 information pathways
RV2614C	thrS threonyl-tRNA synthetase information pathways
RV2785C	rpsO 30S ribosomal protein S15 information pathways
RV2092C	helY ATP-dependent DNA helicase information pathways
RV0683	rpsG 30S ribosomal protein S7 information pathways
RV2592C	ruvB holliday junction DNA helicase information pathways
RV2528C	mrr restriction system protein information pathways
RV1160	mutT2 mutator protein mutT information pathways
RV2839C	infB translation initiation factor IF-2 information pathways
RV2703	sigA RNA polymerase sigma factor information pathways
RV2593C	ruvA holliday junction DNA helicase information pathways
RV3442C	rpsI 30S ribosomal protein S9 information pathways
RV2845C	proS prolyl-tRNA synthetase information pathways
RV0054	ssb single-strand binding protein information pathways
RV2986C	hupB histone-like DNA-binding protein information pathways
RV0719	rplF 50S ribosomal protein L6 information pathways
RV1007C	metG methionyl-tRNA synthetase metS information pathways
RV2580C	hisS histidyl-tRNA synthetase information pathways
RV2412	rpsT 30S ribosomal protein S20 information pathways
RV0640	rplK 50S ribosomal protein L11 information pathways
RV0704	rplB 50S ribosomal protein L2 information pathways
RV1298	rpmE 50S ribosomal protein L31 information pathways
RV1689	tyrS tyrosyl-tRNA synthase information pathways
RV3198C	uvrD2 ATP-dependent DNA helicase II information pathways
RV0720	rplR 50S ribosomal protein L18 information pathways
RV3460C	rpsM 30S ribosomal protein S13 information pathways
RV0105C	rpmB1 50S ribosomal protein information pathways
RV3907C	pcnA poly(A) polymerase information pathways
RV3105C	prfB peptide chain release factor 2 information pathways
RV2448C	valS valyl-tRNA synthase protein information pathways
RV0009	ppiA iron-regulated peptidyl-prolyl-cis-trans-isomerase A information pathways
RV0715	rplX 50S ribosomal protein L24 information pathways
RV2737C	recA recombination protein information pathways
RV3062	ligB ATP-dependent DNA ligase information pathways
RV2191	conserved hypothetical protein information pathways
RV0949	uvrD1 ATP-dependent DNA helicase II information pathways
RV2555C	alaS alanyl-tRNA synthetase information pathways
RV1641	infC initiation factor IF-3 information pathways
RV2838C	rbfA ribosome-binding factor A information pathways
RV3674C	nth endonuclease III information pathways
RV3721C	dnaZX DNA polymerase III gamma/tau subunit dnaZ/X information pathways
RV0629C	recD exonuclease V alpha chain information pathways
RV0630C	recB exonuclease V beta chain information pathways
RV0041	leuS leucyl-tRNA synthetase information pathways
RV0710	rpsQ 30S ribosomal protein S17 information pathways
RV2889C	tsf elongation factor information pathways
RV3580C	cysS cysteinyl-tRNA synthetase 1 cysS1 information pathways
RV0651	rplJ 50S ribosomal protein L10 information pathways
RV2534C	efp elongation factor P information pathways
RV3457C	rpoA DNA-directed RNA polymerase alpha chain information pathways
RV1316C	ogt methylated-DNA-protein-cysteine methyltransferase information pathways
RV1297	rho transcription termination factor information pathways
RV2924C	fpg formamidopyrimidine-DNA glycosylase information pathways
RV2992C	gltX glutamyl-tRNA synthetase gltS information pathways
RV1402	priA primosomal protein N information pathways
RV2343C	dnaG DNA primase information pathways
RV0706	rplV 50S ribosomal protein L22 information pathways
RV3009C	gatB glutamyl-tRNA(gln) amidotransferase subunit B information pathways
RV0668	rpoC DNA-directed RNA polymerase beta chain information pathways
RV3286C	sigF RNA polymerase sigma factor information pathways
RV0684	fusA1 elongation factor G information pathways
RV3458C	rpsD 30S ribosomal protein S4 information pathways
RV0701	rplC 50S ribosomal protein L3 information pathways
RV1407	fmu SUN protein information pathways
RV1629	polA DNA polymerase I information pathways
RV0705	rpsS 30S ribosomal protein S19 information pathways
RV3715C	recR recombination protein information pathways
RV0641	rplA 50S ribosomal protein L1 information pathways
RV3598C	lysS lysyl-tRNA synthetase 1 information pathways
RV1630	rpsA 30S ribosomal protein S1 information pathways
RV1253	deaD cold shock deaD-box protein A information pathways
RV2973C	recG ATP-dependent DNA helicase information pathways
RV0718	rpsH 30S ribosomal protein S8 information pathways
RV0682	rpsL 30S ribosomal protein S12 information pathways
RV1015C	rplY 50S ribosomal protein L25 information pathways
RV0723	rplO 50S ribosomal protein L15 information pathways
RV1329C	dinG ATP-dependent helicase information pathways
RV3056	dinP DNA-damage-inducible protein P information pathways
RV3426	PPE58 PPE family protein PE/PPE
RV1706C	PPE23 PPE family protein PE/PPE
RV1802	PPE30 PPE family protein PE/PPE
RV1068C	PE_PGRS20 PE-PGRS family protein PE/PPE
RV2340C	PE_PGRS39 PE-PGRS family protein PE/PPE
RV0915C	PPE14 PPE family protein PE/PPE
RV1168C	PPE17 PPE family protein PE/PPE
RV2356C	PPE40 PPE family protein PE/PPE
RV0335C	PE6 PE family protein PE/PPE
RV2892C	PPE45 PPE family protein PE/PPE
RV3125C	PPE49 PPE family protein PE/PPE
RV0286	PPE4 PPE family protein PE/PPE
RV3532	PPE61 PPE family protein PE/PPE
RV0922	transposase insertion seqs and phages
RV3474	transposase insertion seqs and phages
RV1370C	transposase insertion seqs and phages
RV2646	integrase insertion seqs and phages
RV3184	transposase insertion seqs and phages
RV2815C	transposase insertion seqs and phages
RV2943	transposase insertion seqs and phages
RV2651C	phiRv2 phage protease insertion seqs and phages
RV2354	transposase insertion seqs and phages
RV0795	transposase insertion seqs and phages
RV0920C	transposase insertion seqs and phages
RV1757C	transposase insertion seqs and phages
RV3381C	transposase insertion seqs and phages
RV0741	transposase insertion seqs and phages
RV2480C	transposase insertion seqs and phages
RV2979C	resolvase insertion seqs and phages
RV1763	transposase insertion seqs and phages
RV2278	transposase insertion seqs and phages
RV3325	transposase insertion seqs and phages
RV1701	integrase insertion seqs and phages
RV2310	excisionase insertion seqs and phages
RV2659C	phiRv2 phage integrase insertion seqs and phages
RV0921	resolvase insertion seqs and phages
RV2885C	transposase insertion seqs and phages
RV2894C	xerC integrase insertion seqs and phages
RV3430C	transposase insertion seqs and phages
RV2655C	phiRv2 phage protein insertion seqs and phages
RV2648	transposase insertion seqs and phages
RV2168C	transposase insertion seqs and phages
RV3186	transposase insertion seqs and phages
RV2978C	transposase insertion seqs and phages
RV2105	transposase insertion seqs and phages
